# Supplementary material for: Lysosome-mediated mitochondrial apoptosis induced by tea polysaccharides promotes colon cancer cell death
Source: Royal Society of Chemistry journal article supplement (doi:10.1039/d1fo00987g), 2021-01-01
Supplement: d1fo00987g1.xlsx [file d1fo00987g1.xlsx]

## Sheet: Sheet1
gene	NC-1	NC-2	NC-3	C800-1	C800-2	C800-3	log2(Fold_change)	p-value
U2af1	3026.14	2679.37	2675.44	896.491	849.098	898.079	-1.66433	4.4508e-85
Tmem97	1656.85	1610.39	1597.12	297.237	334.615	420.499	-2.20826	2.35153e-74
Incenp	2934.78	2976.75	2966.68	1209.02	1154.57	1267.2	-1.28976	8.4385e-70
Mogs	2735.46	2662.58	2647.26	1003.53	913.409	1061.71	-1.43308	4.47687e-68
Fscn1	6517.36	6496.88	6512.71	2964.73	2923.11	2724.68	-1.18101	8.48226e-67
Pitpnc1	1076.54	1238.91	1199.41	312.529	298.44	349.147	-1.87176	1.42144e-65
Ngdn	1269.63	1100.6	1103.37	275.255	286.382	332.974	-1.95663	1.00505e-63
Nfya	2486.31	2379.03	2626.38	897.447	830.006	971.333	-1.47252	2.91798e-62
Trim27	2655.53	2483.75	2543.92	1104.84	1130.46	1099.77	-1.20401	5.93716e-61
Atxn7l3b	4184.69	3992.38	4007.42	1895.25	1757.48	1834.21	-1.15081	3.60544e-60
Mib2	2203.94	2156.74	2208.83	930.898	865.176	962.771	-1.25134	2.23304e-57
Cherp	4613.43	4179.11	4398.87	1610.43	1422.87	1235.81	-1.62758	8.1984e-57
Mthfd1	2865.23	2962.92	2755.82	898.403	794.836	1056.96	-1.64171	2.34591e-54
Kifc5b	1069.27	1117.39	1167.05	411.927	360.741	389.104	-1.52889	4.93849e-53
Ajuba	5158.45	5197.7	5342.53	2649.33	2480.97	2439.27	-1.05231	7.76318e-52
Cpox	11814.9	10295.6	10951.3	4965.11	4652.46	4857.62	-1.19151	1.80963e-50
Ran	26476.4	24685.4	23693.8	9882.43	9518.94	10838.8	-1.30762	2.04865e-50
Bop1	2566.25	2347.41	2298.61	1056.1	934.51	964.674	-1.28691	1.15019e-49
Wbscr22	1327.76	1181.61	1160.79	438.688	380.838	354.855	-1.64376	1.52753e-48
Slc19a2	1958.94	1825.77	1951	842.013	833.021	887.614	-1.16204	9.14394e-48
Hdgfrp2	2597.39	2416.57	2667.09	1114.4	1057.1	941.841	-1.30284	1.53901e-47
Polr1c	1506.32	1432.55	1360.16	542.865	514.483	599.354	-1.37527	2.05264e-46
Ddx23	3612.68	3359.09	3559.6	1789.16	1752.46	1749.54	-0.992927	8.87361e-46
Srsf3	8006.03	7233.91	7330.07	3620.37	3386.34	3649.4	-1.08262	1.1379e-45
Espl1	3299.17	3686.11	3527.24	1307.46	1177.68	1489.82	-1.40285	1.64151e-45
Ftsj3	3241.03	2691.23	2892.57	1193.73	1160.6	1253.89	-1.29004	2.76406e-45
Hira	1766.89	1833.67	1774.58	810.474	680.283	740.154	-1.2683	3.95783e-45
Tra2b	6332.57	5305.39	5571.14	2510.75	2329.24	2241.39	-1.281	7.73752e-45
Cdk2ap1	2699.13	2584.53	2479.19	1074.26	1048.06	1217.73	-1.21647	1.58964e-44
Slc14a1	1460.64	1324.87	1271.44	354.582	408.974	481.386	-1.70415	1.69516e-44
Phf19	1812.57	1773.4	1836.17	667.112	631.046	787.722	-1.37769	2.56232e-44
Srsf1	9392.97	8373.04	8466.84	4199.55	4257.55	4251.61	-1.04554	3.78113e-44
Nudc	1641.28	1766.49	1615.91	661.377	634.06	745.862	-1.29901	2.37904e-43
Maz	4270.85	4266.05	4390.52	2201.09	2117.22	2313.7	-0.962762	3.73422e-43
Ddx39	4249.05	3987.44	4122.25	2045.3	1888.11	1747.64	-1.12127	1.38406e-42
Vps72	1576.91	1343.64	1391.48	573.448	581.808	591.743	-1.30331	7.02254e-42
Atp1a1	9507.16	9799.66	9386.49	5257.57	5256.37	5339.96	-0.855892	1.34514e-41
Sav1	2040.96	2020.4	1812.16	907.004	840.055	878.101	-1.16173	1.99033e-41
Kifc1	2155.15	2182.42	2252.67	1036.99	850.103	927.571	-1.22698	3.56292e-41
Pabpn1	4065.3	3743.41	4008.47	1983.18	2007.69	2076.81	-0.961552	3.69789e-41
Ptrf	8500.18	9194.04	8974.16	2824.23	2816.59	3711.24	-1.51169	4.91701e-41
Obsl1	1569.65	1823.79	1633.66	651.82	629.036	726.835	-1.32407	7.26786e-41
Zc3h7b	3171.48	3093.33	3032.45	1597.05	1470.1	1614.45	-0.98958	9.25043e-41
Cad	4134.86	4460.68	4022.04	1848.42	1514.31	1427.98	-1.3971	1.53164e-40
Rpl22l1	3464.23	3136.8	2841.42	1360.98	1348.51	1232	-1.26051	1.74849e-40
Psrc1	1217.72	1063.05	1171.22	439.644	409.979	473.775	-1.38247	1.90492e-40
Gm10243	788.976	592.781	574.129	129.982	126.611	161.73	-2.22419	5.38646e-40
Ankrd10	1487.64	1651.88	1550.15	716.811	734.545	704.003	-1.12188	8.92129e-40
Scd2	17086.5	23374.4	19313.7	4388.79	5091.57	6303.68	-1.92106	9.58244e-40
Sardh	1854.09	1654.85	1756.84	816.208	710.429	760.133	-1.20287	9.62806e-40
Polr1b	1869.67	1658.8	1752.66	747.394	791.822	824.825	-1.15944	1.20578e-39
Cactin	1623.63	1579.76	1637.83	789.447	755.647	702.1	-1.10726	1.29391e-39
Sema6b	678.935	696.518	615.884	188.282	188.912	230.228	-1.7125	2.1199e-39
Lmf2	4004.05	4113.9	4004.29	2271.81	2201.63	2246.15	-0.851193	2.17601e-39
Sppl2b	664.401	761.724	662.858	183.503	210.014	233.082	-1.73746	2.26179e-39
Pcdh19	4306.15	3770.09	3697.39	1309.37	1682.12	1476.5	-1.39808	3.2186e-39
Pten	2924.4	2962.92	2838.29	1545.44	1587.66	1581.15	-0.888322	9.65902e-39
Rpp25l	340.506	371.476	335.083	75.504	75.3637	86.5733	-2.14034	1.72525e-38
Kat2a	1937.14	1901.84	1850.78	936.632	874.219	798.187	-1.12492	2.97963e-38
Mbd3	2380.42	2559.83	2300.69	1163.14	1025.95	1149.24	-1.11687	3.23085e-38
Nab2	4133.82	3596.21	3901.99	1590.36	1428.9	1780.94	-1.27663	5.00988e-38
Lmnb2	1196.96	1407.86	1315.28	470.228	460.221	550.835	-1.40381	9.09397e-38
Ivd	738.108	780.495	738.017	285.768	269.3	304.434	-1.3922	2.79586e-37
Tubg1	1189.69	1314.99	1203.58	558.156	511.469	549.883	-1.19507	2.81786e-37
Pcnx3	2193.56	2217.99	2298.61	1152.63	1203.81	1178.73	-0.92464	3.04378e-37
Mettl13	858.531	830.882	781.86	337.379	323.562	330.12	-1.3181	3.26816e-37
Nop2	4912.41	4253.21	4555.46	2319.6	2183.54	2258.52	-1.0208	4.38563e-37
Ahcy	3027.18	2726.79	2572.1	1272.1	1083.23	1217.73	-1.2202	4.43241e-37
2210016F16Rik	877.217	801.243	853.887	309.662	298.44	350.099	-1.40132	6.32501e-37
Sco2	1135.71	991.921	1108.59	408.104	360.741	299.677	-1.59866	6.60463e-37
Mrps7	974.801	973.149	993.766	414.794	408.974	449.04	-1.20829	7.0229e-37
Ndufs6	845.035	710.35	684.78	219.822	199.965	252.109	-1.73636	8.99422e-37
Vapb	4843.9	4728.42	4509.53	2337.76	2366.42	2582.93	-0.95036	1.44026e-36
Hypk	1176.2	1128.26	1062.66	412.883	382.848	481.386	-1.398	1.48162e-36
Snrnp70	9688.84	8271.27	9077.51	4433.71	4330.9	4510.37	-1.02618	1.99304e-36
Tymp	837.768	748.88	819.439	319.22	260.256	275.893	-1.49123	4.1046e-36
Psmc1	3578.42	3324.51	3350.83	1213.8	1248.02	1580.2	-1.3428	4.63162e-36
Myh14	839.844	890.16	888.335	272.388	306.479	353.904	-1.48893	4.98106e-36
Adam33	1728.48	2088.57	2048.08	442.511	525.537	688.781	-1.8236	6.08478e-36
Pabpc4	9579.83	9519.08	9061.85	5138.1	5085.55	5388.47	-0.850999	7.45575e-36
Rnf187	3478.76	3574.47	3453.13	1381.05	1427.89	1733.37	-1.20963	8.28738e-36
Pprc1	2918.17	2900.68	2942.67	1647.71	1636.9	1661.07	-0.82496	9.89889e-36
Cct3	8797.08	8031.2	8067.04	4489.15	4135.96	4020.43	-0.97721	6.44745e-35
Srsf4	2248.58	1995.7	2126.37	989.199	1062.13	912.349	-1.10425	3.04827e-34
Prpf38a	839.844	656.999	769.333	266.654	246.188	230.228	-1.60832	4.03157e-34
Mrps5	1350.6	1183.59	1222.37	583.962	539.604	528.002	-1.18532	4.59987e-34
Fkrp	781.709	702.446	695.218	277.167	291.406	278.747	-1.36309	4.83031e-34
Gm11223	944.695	900.04	989.59	221.733	255.232	342.488	-1.78973	8.95261e-34
Tmem128	1750.28	1728.95	1679.59	916.562	902.355	850.511	-0.950638	1.30939e-33
Nr2f2	2068.99	1995.7	1847.65	388.989	426.056	669.754	-1.99307	1.64164e-33
Fam198b	2037.84	2271.34	2130.54	799.961	991.787	974.187	-1.21956	2.40148e-33
Tomm40	4175.35	3865.92	3906.17	1936.34	1747.43	1499.34	-1.20483	2.8066e-33
Ndufa9	2193.56	1922.59	1885.23	972.951	957.622	948.501	-1.05961	4.13845e-33
Lemd2	2748.96	2546	2505.29	1092.42	1016.91	1284.33	-1.20034	4.18874e-33
Mta1	4760.85	4611.84	4645.23	2795.56	2685.96	2653.33	-0.785042	6.71638e-33
Mcm5	3574.27	3913.34	3717.23	1903.85	1554.5	1779.03	-1.09701	8.39067e-33
Cox6b1	3298.13	3005.4	3011.57	1535.89	1517.32	1689.61	-0.97364	1.01239e-32
Snrnp40	1310.12	1221.13	1157.65	564.847	499.41	567.959	-1.17587	1.73628e-32
Zfas1	4863.62	3212.87	3577.35	1332.31	1231.95	1101.67	-1.66851	4.66445e-32
Gm12191	7664.49	6800.19	7781.02	3806.74	3980.21	3719.8	-0.951036	5.17034e-32
Ruvbl2	3857.68	3651.53	3626.41	1537.8	1456.03	1872.27	-1.19411	5.48592e-32
Ttll12	2180.07	2419.54	2292.34	1229.09	1122.42	1203.46	-0.954978	7.38986e-32
Srsf7	5201.01	4375.71	4337.29	1889.51	1734.37	2170.04	-1.26373	1.15534e-31
Syde1	3291.9	3071.59	3293.41	1820.7	1833.85	1750.49	-0.837224	1.47387e-31
Pgp	1009.06	1012.67	882.071	411.927	405.959	432.867	-1.21514	1.75228e-31
Cd2bp2	1522.93	1555.06	1535.54	792.315	762.681	837.192	-0.947298	1.88301e-31
Ifrd2	1430.54	1289.3	1355.99	688.138	659.182	630.748	-1.04285	1.96153e-31
Imp3	1574.84	1267.56	1370.6	585.873	562.716	472.823	-1.37764	2.6778e-31
Gtse1	2050.3	1921.6	1931.16	962.438	751.628	757.279	-1.25587	3.05513e-31
Masp1	1169.97	1218.17	1214.02	578.227	483.333	563.202	-1.14803	3.27072e-31
Actr1a	4446.3	4146.5	4026.21	2156.17	1890.12	2217.61	-1.01025	3.40649e-31
Med22	2392.88	2205.15	2255.81	962.438	1123.42	1166.36	-1.07553	1.18908e-30
Fkbp4	6105.22	6112.56	6065.94	3750.35	3689.81	3565.68	-0.732313	1.32845e-30
Zfp771	563.703	532.515	580.393	150.052	185.897	205.493	-1.63063	1.37462e-30
Slc6a9	3549.35	3267.21	3439.56	1836.95	1942.37	1732.42	-0.896009	1.49803e-30
Jdp2	2094.94	2096.47	1955.17	1033.16	1088.25	1135.92	-0.91616	2.11339e-30
Ap1m1	1720.18	1592.61	1826.78	708.209	654.157	829.582	-1.22886	2.90082e-30
Pcca	1008.02	922.763	958.274	458.759	454.192	451.894	-1.08168	2.92648e-30
Dazap1	2969.04	3161.5	2956.24	1614.26	1608.76	1755.25	-0.868099	3.71158e-30
Dkc1	2826.82	2302.96	2517.82	924.208	840.055	1139.72	-1.39656	3.75365e-30
BC005624	896.941	823.966	826.746	375.609	391.891	384.347	-1.14526	4.26025e-30
Htra2	1666.19	1611.38	1619.04	812.385	768.71	889.517	-0.986511	4.58669e-30
Gfm1	2318.14	2388.91	2262.07	1304.6	1293.24	1184.44	-0.88193	5.22143e-30
4933404O12Rik	832.578	836.81	910.256	387.078	399.93	386.25	-1.13669	8.03838e-30
Rae1	2523.69	2394.84	2395.69	1383.92	1381.67	1417.52	-0.806034	8.83643e-30
Abt1	665.439	589.817	603.358	237.025	248.198	251.158	-1.33558	1.02696e-29
Grwd1	1807.38	1650.9	1573.11	827.677	668.225	694.489	-1.19945	1.51586e-29
Tmem11	1499.05	1235.95	1280.83	513.236	534.58	613.624	-1.27292	1.82477e-29
Mprip	9876.74	10085.2	10266.5	5131.41	5074.49	5845.12	-0.913183	1.89733e-29
Rbmx	1042.28	1080.84	1089.8	418.617	391.891	508.975	-1.28327	1.96655e-29
Dus3l	802.472	748.88	845.536	339.29	341.649	286.358	-1.30937	1.9697e-29
Tars	12343.3	10469.5	11054.6	5549.07	5435.23	6000.2	-0.99562	1.97317e-29
Gm4737	4542.84	4359.91	4302.84	2411.35	2300.1	2598.15	-0.853132	2.48985e-29
Gm12992	1380.71	1232.99	1274.57	618.369	617.983	525.148	-1.14251	2.77446e-29
Pwwp2b	1404.59	1412.8	1456.2	578.227	587.837	723.03	-1.17737	2.91884e-29
Nob1	2262.08	1972.97	2067.91	1045.59	882.258	1033.17	-1.08946	4.21036e-29
Slc25a3	12894.6	13271.4	12819.8	7600.1	7598.68	8018.02	-0.747771	5.66164e-29
Eftud2	3987.44	4015.11	3869.63	2335.85	2128.27	2035.9	-0.869064	6.30934e-29
Fiz1	1177.24	1267.56	1209.85	594.475	570.755	485.191	-1.14727	8.71999e-29
Hgh1	1271.71	1155.92	1172.27	600.209	497.401	515.634	-1.15752	9.0066e-29
Ndufa3	1091.07	1031.44	990.634	409.06	397.921	497.559	-1.25429	1.33534e-28
Cks1b	2414.68	2580.57	2652.48	1455.6	1336.45	1311.92	-0.897959	1.35754e-28
Ssrp1	13146.8	12124.4	12631.9	5843.44	5780.9	6935.38	-1.03008	1.53647e-28
Capn15	1075.5	1055.15	1010.47	531.396	530.561	507.072	-1.00158	1.58075e-28
Pdf	503.491	537.455	517.76	177.769	194.941	140.801	-1.60326	1.65255e-28
Gm11361	7049.92	5238.21	5848.81	2608.23	2434.75	2699.95	-1.22786	1.91997e-28
Arhgef1	3680.16	4011.15	3855.02	2251.74	2271.97	2254.71	-0.768508	2.08732e-28
Slc39a3	655.058	666.879	587.7	184.459	214.033	254.012	-1.54919	2.77805e-28
Capn10	498.301	598.709	550.12	187.326	167.81	210.249	-1.54202	3.81737e-28
Gm42047	11436	12330.8	13993.1	6311.76	6426.02	6107.7	-1.00264	4.73087e-28
Eif2b5	1775.2	1750.68	1725.52	931.854	915.418	1011.29	-0.877188	5.16033e-28
Nsfl1c	2265.19	2098.45	2064.78	1164.1	1193.76	1218.69	-0.845848	1.25786e-27
Cbx6	4834.56	5397.27	5058.6	2727.7	2723.14	2982.5	-0.858449	1.29345e-27
Atic	6164.4	5710.46	5821.67	3605.08	3468.74	3429.63	-0.752551	1.84222e-27
Cdc25b	4019.63	4471.55	4371.73	2462.96	2462.89	2505.87	-0.791493	2.01972e-27
Tada2b	1163.74	1130.24	1164.96	621.236	543.624	563.202	-1.00076	2.86921e-27
Trim11	1580.03	1582.73	1740.13	898.403	824.982	810.554	-0.952049	2.93732e-27
Col3a1	3760.09	4306.56	3712.01	1482.36	1906.2	1824.7	-1.17614	3.20649e-27
Trmt61a	842.959	754.808	827.79	374.653	324.567	363.418	-1.18981	3.26399e-27
Idh3b	2934.78	2823.61	2797.58	1464.2	1400.76	1655.36	-0.920263	3.38021e-27
Arf1	8318.51	7355.43	7716.3	4545.53	4294.73	4392.41	-0.821728	4.22563e-27
Psmc5	2454.13	2042.13	2180.65	1141.16	1124.43	1024.61	-1.02097	8.66158e-27
Eef1d	5048.41	4549.6	4514.74	2231.67	2143.34	2601	-1.01636	1.04549e-26
Klhdc4	1140.9	1060.09	1101.28	513.236	464.241	376.737	-1.28613	1.11686e-26
Mrpl35	1065.12	987.969	1002.12	524.705	519.507	497.559	-0.986658	1.15344e-26
Wdr4	1672.42	1414.77	1571.03	740.704	808.904	734.446	-1.02825	1.28115e-26
Telo2	986.22	984.017	994.81	476.918	433.09	511.829	-1.05967	1.31663e-26
Mid1	685.164	573.022	638.849	259.963	209.009	241.644	-1.41544	1.33458e-26
Luc7l	2848.62	2881.9	2769.39	1513.9	1577.61	1712.44	-0.823195	1.73619e-26
Samd1	1429.5	1664.73	1503.18	585.873	615.973	758.23	-1.2298	2.34553e-26
Kif1c	4509.62	4449.81	4446.89	2764.02	2797.5	2859.77	-0.670778	3.6429e-26
Scaf1	3381.18	3398.61	3514.72	2033.83	1903.19	2103.45	-0.768944	4.01472e-26
Trp53rka	584.465	584.878	553.252	222.689	225.086	258.769	-1.28538	4.28597e-26
Nsun5	1109.76	1152.96	1066.84	581.094	590.852	570.813	-0.93426	4.82357e-26
Fasn	4236.59	4373.74	4304.93	2662.71	2385.51	2368.87	-0.800101	5.26017e-26
Eif3g	2429.22	2289.12	2338.27	1278.79	1111.36	988.458	-1.0625	9.30651e-26
Noc2l	3355.23	3208.92	3223.48	2040.52	1957.45	1984.53	-0.710114	9.56382e-26
Rps29	9255.94	7444.34	7801.9	4208.16	3694.83	3639.88	-1.08585	1.18162e-25
Eif4h	13715.7	12397	12682	7785.52	7426.85	7453.87	-0.775286	1.59757e-25
Ccng1	2999.15	2990.58	2936.41	1604.7	1534.41	1795.21	-0.854981	1.67752e-25
Exosc5	718.384	734.061	670.166	329.733	332.605	303.482	-1.1365	1.71894e-25
Fam64a	2542.37	2554.89	2513.64	789.447	703.395	1139.72	-1.53122	1.74421e-25
Stk11	1736.79	1847.5	1773.54	939.5	862.161	1017.95	-0.925857	1.90109e-25
Rbmxl1	2025.38	1725.98	1925.94	997.8	1008.87	1009.39	-0.91234	2.19838e-25
Gm9825	3053.13	2793.98	2843.51	1613.3	1438.95	1662.02	-0.882117	2.3179e-25
Josd2	1020.48	951.414	959.318	496.033	467.255	512.78	-0.989269	2.72741e-25
BC005537	3338.62	3431.22	3561.69	2108.38	2141.34	2070.15	-0.70913	2.82021e-25
Ppp1r14b	5107.58	4705.7	4445.85	2285.19	2322.21	2692.33	-0.965883	2.82873e-25
Safb	3624.1	3551.75	3691.13	1823.57	1739.4	1346.17	-1.14652	2.96656e-25
Chd3	3883.63	4060.55	4005.34	2249.83	1933.33	2288.96	-0.88444	3.24677e-25
Ndufv1	1784.54	1777.36	1669.15	885.978	938.53	1009.39	-0.884322	3.85262e-25
Ddrgk1	1468.95	1275.47	1318.41	551.466	580.803	693.538	-1.15359	5.17101e-25
Apcdd1	343.62	416.923	435.294	124.247	125.606	137.946	-1.62447	5.36976e-25
Ect2	3844.18	3977.56	3796.56	1987.95	1891.13	2292.77	-0.912477	6.86278e-25
Kif20a	3466.3	3839.25	3728.71	1857.97	1686.14	2083.47	-0.971234	7.30351e-25
Psmb7	3873.25	3353.17	3237.05	1900.98	1713.27	1814.23	-0.946592	7.48881e-25
Ssbp1	1079.65	955.366	949.923	404.281	447.158	493.753	-1.14972	8.75613e-25
Samm50	2930.63	2805.83	2731.81	1749.02	1659.01	1674.38	-0.736478	1.13299e-24
Senp1	2133.35	2260.47	2220.31	1318.93	1314.34	1220.59	-0.779432	1.13709e-24
Rrp36	602.113	542.395	524.024	230.335	197.955	234.033	-1.33204	1.16823e-24
Atad3a	2875.61	2474.86	2687.97	1383.92	1447.99	1525.97	-0.883132	1.24801e-24
Zmat3	2874.57	2721.85	2723.46	1654.4	1516.32	1407.05	-0.861892	1.29908e-24
Nop9	1110.8	1121.34	1092.93	503.679	443.139	576.521	-1.12549	1.70946e-24
Ltbp3	5012.08	5012.95	5083.65	3272.48	3163.27	3245.07	-0.642116	1.94423e-24
Tarbp2	758.871	833.846	841.36	301.06	272.314	376.737	-1.35641	2.0251e-24
Trip6	4771.23	4338.17	4155.65	2063.46	1912.23	2427.86	-1.05051	2.14643e-24
Aup1	3557.66	3350.2	3394.67	2045.3	2131.29	2144.35	-0.704771	2.19385e-24
Efnb2	5545.67	5276.74	5182.82	2352.09	2263.93	2954.91	-1.07986	2.23506e-24
Polr3k	738.108	705.41	727.578	285.768	272.314	351.05	-1.25502	2.66304e-24
Cyc1	3830.69	3803.68	3780.9	2462.96	2339.29	2296.57	-0.685288	2.93493e-24
Hs6st1	1634.01	1544.2	1564.76	894.58	837.04	749.668	-0.934736	3.10738e-24
Armc5	891.751	879.292	836.141	420.529	328.586	400.52	-1.1805	3.15483e-24
Cox5a	2575.59	2341.49	2290.25	1000.67	955.612	1271.01	-1.15883	3.70996e-24
Btbd19	2110.51	2144.88	2088.79	808.562	903.36	1120.7	-1.16316	4.09589e-24
Rbck1	3443.47	3338.35	3408.24	1997.51	1839.88	2102.49	-0.778416	4.4579e-24
Wdr55	900.056	767.652	760.982	301.06	290.402	372.931	-1.33176	4.46756e-24
Tpgs1	472.348	455.454	422.768	94.619	101.49	159.828	-1.92272	4.49631e-24
Dohh	998.678	864.473	922.782	472.139	424.047	409.083	-1.09347	4.76708e-24
Sf3a1	4077.76	3736.5	3839.36	2088.31	1888.11	1572.59	-1.0705	5.04795e-24
Paf1	923.933	937.582	941.572	485.52	483.333	419.548	-1.01395	5.15132e-24
Rnf26	826.349	928.691	902.949	429.131	419.022	455.699	-1.02746	5.99354e-24
Dmap1	415.251	415.935	423.812	151.008	157.761	176.001	-1.37197	6.06298e-24
Xrcc1	1369.29	1359.45	1348.68	737.837	617.983	731.592	-0.965374	6.14463e-24
Dnaja1	2229.9	2332.59	2187.95	1317.98	1284.2	1141.63	-0.850696	6.53542e-24
Pfn1	9411.66	9644.55	8881.26	5362.7	4607.24	5336.15	-0.868029	6.73864e-24
Otud7b	4397.5	4484.39	4504.31	2442.89	2470.93	2799.84	-0.795171	7.10681e-24
Stk16	1411.85	1440.46	1436.37	757.908	723.492	836.241	-0.88753	7.11717e-24
Kctd17	786.9	774.568	774.553	376.564	355.717	405.277	-1.03758	7.30893e-24
Slc52a2	1168.93	1125.3	1177.49	631.749	593.866	652.63	-0.885797	1.04287e-23
Exosc6	648.829	680.71	605.446	181.592	186.902	272.088	-1.59418	1.67128e-23
Shc1	3439.31	3250.42	3399.89	2110.29	1919.26	2051.12	-0.730344	2.67135e-23
Cox7a2	1540.58	1368.34	1467.68	549.555	653.152	745.862	-1.16726	2.68647e-23
Hars	3645.9	3598.18	3381.1	2150.43	1928.31	2131.04	-0.774728	3.1964e-23
Ddx27	4113.06	3666.35	3779.86	2332.02	2122.24	2068.25	-0.82545	3.37613e-23
Sfpq	12306	11051.4	11405.3	6884.25	7093.24	7025.76	-0.726916	3.38812e-23
Tfpt	337.391	365.548	327.776	109.911	120.582	81.8165	-1.72446	3.64175e-23
Fen1	1033.97	1027.49	1036.56	514.192	530.561	420.499	-1.08071	3.80042e-23
Smarca4	3557.66	3479.63	3356.05	2170.5	1975.54	2129.13	-0.727784	3.81379e-23
Fbxo9	579.275	471.261	600.226	79.327	76.3686	161.73	-2.37686	3.99309e-23
Acin1	5160.53	4797.58	5113.93	2685.65	2450.83	1983.58	-1.08194	4.26994e-23
LOC101056014	21422.8	17802.2	18428.5	6490.48	8397.53	8999.82	-1.27114	4.47949e-23
Gpatch4	1440.92	1234.96	1434.28	738.793	667.22	676.413	-0.980491	4.80901e-23
Mlf2	4440.07	4445.86	4286.14	2745.86	2706.06	2873.09	-0.661911	5.06317e-23
Olfm1	443.28	546.347	479.137	172.99	161.781	201.687	-1.45267	5.6254e-23
Wiz	2306.72	2101.41	2200.48	1198.51	1227.93	1337.61	-0.811856	5.62932e-23
S1pr2	1035.01	1057.13	1019.86	542.865	541.614	590.791	-0.893302	9.4662e-23
Dus2	1401.47	1187.54	1274.57	602.121	624.012	694.489	-1.00801	1.06303e-22
Smarcb1	1610.13	1644.97	1609.65	954.792	982.743	983.701	-0.735893	1.19014e-22
Tnk2	6396.94	6773.51	6423.99	3211.31	3040.68	3842.52	-0.956784	1.19937e-22
Kcnj2	222.159	388.272	405.022	59.2563	73.354	63.7408	-2.37178	1.23498e-22
Ybx3	12288.3	10820.2	11220.6	6837.42	6486.31	6092.48	-0.822155	1.26014e-22
Fbxl6	1479.33	1354.51	1439.5	776.067	821.967	718.273	-0.883735	1.29292e-22
Fbxw4	1768.97	1454.29	1682.72	849.659	803.88	865.733	-0.961105	1.34453e-22
Shb	1080.69	1148.02	1084.58	535.219	503.43	613.624	-1.00343	1.69022e-22
Egln2	1123.25	1043.3	1128.43	351.715	385.862	528.002	-1.37999	2.37473e-22
Tle1	2763.49	2172.54	2285.03	1012.14	968.675	1227.25	-1.1702	2.47015e-22
Fam172a	1154.4	1051.2	1133.64	627.926	589.847	582.229	-0.891216	3.15835e-22
Ahsa1	1819.84	1857.38	1819.47	922.296	899.341	1093.11	-0.914911	3.29686e-22
Bax	3603.34	3125.93	3124.31	1688.81	1563.55	1877.97	-0.941362	3.48146e-22
Cstf1	1836.45	1591.62	1732.83	960.526	968.675	976.09	-0.828726	3.72992e-22
Styk1	867.874	938.57	920.695	407.148	486.347	454.748	-1.01692	4.11341e-22
Mtmr10	6792.46	6273.6	6314.38	4145.08	3976.19	3882.48	-0.691084	4.57623e-22
Ubac1	1138.82	1039.34	1080.41	519.927	484.338	597.451	-1.02397	5.38499e-22
Mbd6	2618.16	2404.72	2683.79	1569.34	1404.78	1421.32	-0.809849	5.46062e-22
Foxm1	7544.07	8043.05	7920.9	3277.26	3286.86	4368.62	-1.10443	6.14236e-22
Kif18b	1504.25	1608.41	1455.16	814.297	760.671	626.943	-1.05304	6.26091e-22
Fdps	1299.73	1506.65	1337.2	635.572	578.794	739.203	-1.08449	6.45693e-22
Actl6a	1664.12	1564.94	1490.65	895.535	927.477	883.809	-0.802249	7.11926e-22
Sigmar1	938.466	925.727	955.142	374.653	344.664	480.434	-1.23185	7.25192e-22
Igfbp4	3000.19	2904.63	3034.53	1938.26	1878.06	1897.95	-0.64548	9.65252e-22
Lsm14b	1719.14	1806.01	1657.67	987.287	1053.08	1010.34	-0.764924	1.06154e-21
Dnlz	1051.62	915.847	1027.17	437.732	445.149	529.905	-1.08326	1.06158e-21
Rpl35a-ps2	319.743	263.788	239.047	70.7253	82.3977	80.8652	-1.81415	1.24076e-21
Cdca7	1724.33	1661.76	1577.29	827.677	827.996	977.993	-0.91401	1.35225e-21
Snrpd2	2352.39	1943.33	1779.8	656.598	685.308	949.452	-1.40655	1.48248e-21
Impdh2	3046.9	3002.44	3003.22	1154.54	1113.37	1611.6	-1.2222	1.54491e-21
Sigirr	977.915	1106.53	995.853	388.033	432.085	526.099	-1.1941	1.57776e-21
Tmem55a	1247.83	1111.46	1125.29	455.892	498.406	610.77	-1.15444	1.58665e-21
Nhp2	1916.38	1843.55	1745.35	1028.38	882.258	1051.25	-0.893913	1.60279e-21
Ctdsp1	3382.22	3363.05	3305.94	2017.58	1859.98	2140.55	-0.739786	1.68783e-21
Mrfap1	6591.07	6401.05	6363.44	2456.27	2551.31	3496.23	-1.18647	1.70612e-21
Kdelc1	1135.71	1092.69	1130.51	595.431	609.944	658.338	-0.84957	1.891e-21
Wdr3	2957.62	2830.53	2833.07	1790.11	1826.82	1651.55	-0.710623	2.2016e-21
Srsf2	6837.1	6515.65	6483.49	4371.59	4318.85	4278.24	-0.613092	2.88106e-21
Eno3	4215.83	4286.8	4086.76	2343.49	2448.82	2702.8	-0.748162	3.07172e-21
Gsk3a	2789.45	2771.25	2765.22	1791.07	1824.81	1786.64	-0.624029	3.20819e-21
Uba52	18275.2	15026	15927.4	8828.24	8330.21	9202.46	-0.901055	3.38976e-21
Atf5	10766.4	10844.9	11031.6	4191.91	4202.28	2392.66	-1.59756	3.46678e-21
Clptm1l	3900.24	3474.69	3684.87	2112.2	1909.21	1638.23	-0.966528	3.85368e-21
Fads1	5234.23	5734.17	5313.31	3282.04	3464.72	3135.67	-0.720472	4.60921e-21
2410006H16Rik	4766.04	3412.44	4112.85	1968.84	1561.54	1818.99	-1.19998	5.08554e-21
Sema5a	3017.83	3070.61	2899.88	1770.04	1930.32	1882.73	-0.687164	5.17639e-21
Glud1	7180.72	7007.66	7014.82	4674.56	4785.1	4608.36	-0.591892	5.73259e-21
Map2k7	2788.41	2471.9	2571.06	1277.83	1378.65	1554.51	-0.894956	5.809e-21
2410002F23Rik	3668.74	3294.88	3393.63	1057.06	998.821	1653.45	-1.48116	6.61476e-21
Dhx16	1365.14	1415.76	1418.62	800.916	728.516	631.7	-0.958553	7.21155e-21
Dctd	675.82	597.721	716.096	295.326	314.518	312.996	-1.10808	7.89829e-21
U2af2	7021.89	6504.79	6650.51	4048.55	3962.12	3405.85	-0.821637	8.0524e-21
Ccdc114	165.062	167.955	179.546	26.7609	29.1406	46.6164	-2.31953	8.471e-21
Rpl7a-ps5	1081.73	842.737	703.569	334.512	291.406	238.79	-1.60377	8.53946e-21
Med8	993.487	1061.08	934.265	539.042	533.575	538.467	-0.891792	8.6407e-21
Neurl4	1352.68	1344.63	1485.43	793.27	746.604	659.289	-0.927502	9.07206e-21
Rcl1	1639.2	1333.76	1439.5	780.846	784.788	743.96	-0.93382	1.07659e-20
Zdhhc3	2523.69	2559.83	2533.48	1630.51	1580.63	1669.63	-0.642012	1.10946e-20
Trp53	3387.41	3330.44	3309.07	2110.29	2079.03	2235.68	-0.641999	1.15999e-20
Nr2f6	1661	1760.56	1667.06	740.704	745.599	967.528	-1.05199	1.4981e-20
Cdkn2c	701.774	802.231	762.026	243.716	237.145	352.953	-1.44171	1.52741e-20
Snhg8	1188.65	1066.02	915.475	431.998	455.197	524.197	-1.1673	1.53815e-20
Rps10-ps1	476.5	383.332	379.969	166.3	132.64	136.995	-1.50708	1.59064e-20
Rbm8a	2689.79	2372.11	2310.09	1311.29	1144.52	944.695	-1.11633	1.61721e-20
Clpp	1231.22	1021.56	1065.79	525.661	474.289	580.327	-1.06973	1.6854e-20
Cenpv	987.258	940.546	888.335	496.033	484.338	526.099	-0.902322	1.84208e-20
Sphk2	1755.47	1434.53	1612.78	877.376	858.142	803.895	-0.919214	1.86729e-20
Anp32b	11467.1	9863.88	10184	6282.13	6065.27	6275.14	-0.758944	1.9531e-20
Hnrnpd	6662.7	6139.24	6079.51	2889.22	2988.42	3721.7	-0.975877	2.4056e-20
Nle1	1026.71	795.315	923.826	342.158	440.124	386.25	-1.23285	2.40802e-20
Mrpl37	745.375	662.927	616.928	314.441	323.562	278.747	-1.14389	2.47443e-20
Dph2	555.398	523.623	537.594	256.14	244.179	266.379	-1.07569	2.62794e-20
Dnph1	934.314	973.149	807.957	311.574	364.761	440.477	-1.28181	2.6829e-20
Mrps6	1309.08	1381.18	1346.59	824.81	791.822	772.5	-0.756829	2.9148e-20
Omd	113.156	142.268	125.265	12.4247	25.1212	19.0271	-2.75575	3.02097e-20
Man1b1	2951.39	2999.47	3150.4	1954.5	1977.54	1929.35	-0.634832	3.17139e-20
Upf3a	976.877	803.219	910.256	323.043	298.44	431.915	-1.35185	3.22287e-20
Pip5k1c	841.921	925.727	873.721	464.493	429.071	488.045	-0.934667	3.98763e-20
Letmd1	748.489	711.338	724.447	375.609	397.921	365.32	-0.939862	4.36332e-20
Axin1	3263.87	2960.94	3039.75	1921.05	1872.04	1694.36	-0.755601	4.68413e-20
Sh2b1	1336.07	1375.25	1355.99	787.536	755.647	645.019	-0.894578	4.7777e-20
Hspbp1	742.261	681.698	699.394	364.14	363.756	372.931	-0.947508	5.59072e-20
Trmt1	2320.21	2137.96	2202.57	1352.38	1265.11	1122.6	-0.832617	5.85669e-20
Dhx38	1894.58	1669.67	1798.59	1047.5	946.569	851.463	-0.914194	6.05245e-20
Prr12	1398.36	1381.18	1335.11	799.005	850.103	813.408	-0.740886	6.05307e-20
Nfic	4135.9	3915.32	3975.06	2399.88	2380.49	2656.18	-0.693348	7.20461e-20
Hcfc1	4116.17	4504.15	4217.24	2717.19	2671.9	2795.08	-0.649496	7.31795e-20
Rgl1	6547.46	6634.21	6396.84	3993.11	4261.57	4363.87	-0.633762	7.61222e-20
Hnrnpab	9929.68	9634.67	9200.68	4909.67	4766	5906.96	-0.884317	8.28827e-20
Atp5g1	889.674	807.17	842.404	449.201	377.824	336.78	-1.12535	8.5221e-20
Gemin5	1768.97	1742.78	1737	1091.46	1093.28	988.458	-0.72621	9.64014e-20
Rbm10	1820.87	1804.03	1775.63	760.775	838.045	1038.88	-1.03365	9.74076e-20
Slc19a1	864.759	847.677	823.615	452.069	402.945	470.921	-0.934981	1.00452e-19
Irf2bp1	745.375	857.557	860.15	431.042	372.799	410.034	-1.0205	1.03867e-19
Nme2	9726.21	7813.85	7788.33	4684.12	4174.15	4192.62	-0.956558	1.10048e-19
1500011K16Rik	556.436	479.165	407.11	111.822	104.504	178.855	-1.86693	1.15697e-19
Mfsd10	2085.6	2039.17	2011.54	1173.66	1123.42	1310.97	-0.765877	1.48763e-19
Nde1	1609.1	1723.02	1676.46	827.677	810.914	1007.48	-0.920285	1.59141e-19
Aqr	2148.92	2016.44	2135.76	1328.49	1345.49	1272.91	-0.674878	1.6053e-19
Noa1	728.765	809.146	766.202	221.733	261.261	359.612	-1.45097	1.61654e-19
Slc25a38	358.154	334.921	315.249	139.539	122.592	106.552	-1.45161	1.7093e-19
Tmem64	889.674	916.835	828.834	452.069	496.396	432.867	-0.932645	1.74396e-19
Otud6b	1588.33	1539.26	1499	871.642	968.675	848.609	-0.783321	1.74958e-19
Slc25a33	2407.42	1979.89	2138.89	1208.06	1243	1227.25	-0.827075	1.87546e-19
Drg1	2310.87	2046.08	2061.65	1254.9	1213.86	1315.72	-0.761927	1.88306e-19
Hjurp	10670.9	12086.8	11502.4	7086.87	6627.99	7146.58	-0.715683	1.9023e-19
Nr2c2ap	997.64	944.498	854.931	393.768	362.751	489.948	-1.16548	1.95977e-19
Cdk4	11252.3	10459.6	10545.2	6307.93	6123.56	6993.41	-0.73165	2.03845e-19
Gm9843	242.922	242.052	210.862	70.7253	66.3201	80.8652	-1.67422	2.53805e-19
Timm13	1427.42	1268.55	1247.43	502.723	492.376	695.44	-1.22147	2.6086e-19
Pfas	2326.44	2453.13	2504.25	1509.13	1555.51	1393.74	-0.708374	2.8969e-19
Aaas	2519.53	2554.89	2554.35	1629.55	1642.93	1709.58	-0.614665	2.96317e-19
Polr2f	1049.55	913.871	869.545	477.874	496.396	485.191	-0.956914	3.1168e-19
Gpn1	721.498	710.35	724.447	360.317	380.838	301.58	-1.04882	3.63185e-19
Senp3	1787.65	1705.23	1723.43	1008.31	1079.21	903.787	-0.802567	4.04375e-19
Cytip	246.036	358.633	267.231	67.8581	89.4316	85.6219	-1.84531	4.34615e-19
Pcyox1l	350.887	428.778	402.934	138.583	116.563	165.536	-1.49006	4.81211e-19
Atp5k	539.826	539.431	513.585	271.432	239.154	220.714	-1.12307	5.44072e-19
Grasp	757.832	615.505	657.639	196.884	199.965	304.434	-1.53319	5.63655e-19
Rps18-ps3	419.403	296.391	402.934	132.849	117.567	125.579	-1.57191	5.89124e-19
Mrs2	1333.99	1354.51	1397.74	849.659	798.856	750.619	-0.768255	6.4012e-19
Cox14	1610.13	1299.18	1283.96	683.359	662.196	746.814	-1.00262	6.77514e-19
Dnajc27	620.8	587.841	588.744	247.539	299.445	300.628	-1.08474	6.78728e-19
Emp3	2316.06	2056.95	2160.81	1204.24	1199.79	1368.05	-0.792288	7.09322e-19
Metap1	2643.07	2360.26	2280.86	1221.45	1300.28	1469.84	-0.867702	7.9068e-19
Acly	4005.09	4078.34	4002.2	2446.71	2405.61	2722.78	-0.673855	8.35834e-19
Zkscan17	936.39	920.787	1011.51	492.21	552.667	463.31	-0.928025	8.64903e-19
Utp14a	1883.16	1664.73	1685.85	979.641	1074.18	990.361	-0.781922	9.38888e-19
Efcab14	999.716	1021.56	954.099	588.74	561.711	535.613	-0.819578	1.08862e-18
Atf4	19238.6	17453.5	18171.7	10846.8	10608.2	11821.5	-0.721314	1.15933e-18
Tufm	991.411	1127.27	1000.03	424.352	415.003	563.202	-1.15256	1.63719e-18
Rrp9	1234.33	1062.07	1126.34	638.439	595.876	517.537	-0.966233	1.7011e-18
Srcap	2707.43	2820.65	2822.63	1704.1	1590.68	1836.12	-0.702489	1.72836e-18
Map2k2	1979.71	2037.19	1907.15	1289.3	1232.95	1250.08	-0.651153	1.94391e-18
Zrsr2	1454.42	1346.6	1329.89	817.164	836.035	838.144	-0.729501	1.9652e-18
Usp5	3068.7	3112.1	3026.18	2031.92	1924.29	2078.71	-0.609279	2.38875e-18
Gm15210	1142.98	1229.03	1146.17	456.847	500.415	649.775	-1.13022	2.54196e-18
Npm3	1850.98	1785.26	1609.65	903.181	889.292	1061.71	-0.877918	2.80526e-18
Txn1	6194.5	6018.71	5878.04	3321.22	3353.18	3954.78	-0.767186	3.06493e-18
Ybx1	18508.8	18018.6	17403.4	9335.74	9052.69	11237.4	-0.864221	3.38566e-18
Slc1a5	16196.9	14805.7	15374.1	8401.02	8570.37	6483.48	-0.983542	3.49914e-18
Sac3d1	457.814	407.043	423.812	129.982	125.606	192.174	-1.52374	3.77506e-18
Usp21	596.923	679.723	635.718	323.043	287.387	332.023	-1.02051	3.82665e-18
Kctd15	380.992	310.222	363.267	115.645	144.698	137.946	-1.40487	4.20364e-18
Rrp8	1567.57	1349.57	1382.09	854.438	746.604	779.16	-0.852621	4.61311e-18
Cdk9	1840.6	1856.39	1924.9	1224.31	1149.55	1209.17	-0.649651	4.66787e-18
Fhl3	1309.08	1436.51	1367.47	574.404	476.299	734.446	-1.20362	5.32887e-18
Lonp1	16193.7	13281.3	14876.2	8268.17	8183.5	8888.51	-0.807504	5.64646e-18
Ap2s1	2315.02	2185.39	2003.19	1265.41	1043.03	1248.18	-0.870425	5.6703e-18
Rrp12	2912.98	2440.28	2655.61	1484.28	1376.64	1101.67	-1.01518	5.85396e-18
Ctbp1	5583.04	5256.98	5374.89	2406.57	2302.11	3210.82	-1.0337	6.40905e-18
2610507B11Rik	8031.99	9046.83	8623.42	4963.2	5113.68	5593.02	-0.713905	6.60593e-18
Rrs1	3188.09	2563.78	2913.45	1213.8	1094.28	1582.1	-1.1551	6.80607e-18
Lbr	3319.93	3685.12	3233.91	1781.51	1910.22	2143.4	-0.811278	6.94156e-18
Suv39h1	1038.13	1213.23	1127.38	604.988	524.532	636.456	-0.935697	7.88015e-18
Wdr74	1452.34	1222.12	1236.99	536.174	555.682	720.176	-1.1097	8.21147e-18
Vti1a	1042.28	930.667	1053.27	526.617	553.672	588.889	-0.85803	9.66368e-18
Aen	1450.26	1339.69	1321.54	839.146	708.419	686.878	-0.879533	1.0225e-17
Metap2	7031.23	6241.99	6456.35	4265.5	4191.23	3929.1	-0.671653	1.05429e-17
Reep4	1523.97	1496.77	1479.17	950.969	790.817	864.782	-0.78736	1.10646e-17
Mtcl1	1340.22	1598.53	1509.44	790.403	850.103	867.636	-0.826845	1.16708e-17
Traf7	3002.26	3136.8	3076.29	2079.71	1930.32	2053.98	-0.603669	1.21594e-17
Plpp2	2061.72	2033.24	1923.86	1245.34	1237.98	1329.04	-0.658723	1.25131e-17
Pex14	2830.97	2198.23	2532.43	1413.55	1309.32	1398.49	-0.875304	1.40039e-17
Mcl1	6582.76	6167.89	6052.37	3566.85	3740.05	4157.42	-0.713769	1.49763e-17
Ppid	4319.64	3896.55	4032.48	2597.72	2723.14	2516.33	-0.644249	1.60733e-17
Mettl9	2432.33	2194.28	2338.27	1213.8	1121.41	1440.35	-0.883042	1.66187e-17
C330006A16Rik	1598.71	1468.12	1553.28	755.04	668.225	910.447	-0.984746	1.68351e-17
Emc10	4662.23	4317.42	4299.71	1564.56	1519.33	2402.17	-1.27518	1.74523e-17
Chchd4	1031.9	866.449	845.536	452.069	395.911	485.191	-1.0407	1.78564e-17
Fads2	1128.44	1397.98	1249.51	647.997	579.798	703.051	-0.967432	1.80068e-17
Ppp1r8	1591.45	1661.76	1624.26	1012.14	1043.03	1062.66	-0.645681	1.92951e-17
Pomt2	555.398	604.637	525.067	250.406	295.426	261.623	-1.06244	2.37718e-17
Inpp5b	1926.76	2011.5	2009.45	1330.4	1239.98	1264.35	-0.633122	2.4479e-17
Gm25432	532.559	386.296	430.075	187.326	173.839	175.049	-1.33031	2.48684e-17
Rfxank	995.563	1001.8	933.221	576.316	572.764	579.375	-0.7618	2.58131e-17
Rps28	5819.74	5061.36	4645.23	3001.05	2569.4	2913.05	-0.871878	2.60781e-17
Scap	2086.63	1990.76	2142.02	1367.67	1280.18	1211.07	-0.688471	2.7157e-17
Bub3	2412.61	2399.78	2302.78	1552.13	1351.52	1507.9	-0.689371	2.75824e-17
Rbm14	1845.79	1931.48	1880.01	1115.36	1075.19	1246.27	-0.71883	2.85948e-17
Mecr	1033.97	1006.74	1007.34	619.324	574.774	521.343	-0.829352	2.8857e-17
Tead3	2047.19	1898.88	1810.07	1182.26	1222.9	1148.29	-0.69601	2.95596e-17
Ifitm2	2860.04	2568.72	2715.11	1787.25	1742.41	1724.81	-0.632038	3.68043e-17
Gemin6	502.453	520.66	457.216	167.256	170.824	240.693	-1.3542	3.82971e-17
Cdr2l	5179.21	5077.17	5197.44	3439.73	3380.32	3004.38	-0.653566	3.90323e-17
Uqcr11	926.009	806.183	679.56	343.113	324.567	398.618	-1.17708	4.29995e-17
Fam212b	312.476	276.631	342.39	115.645	98.4753	65.6435	-1.7356	4.32284e-17
Tmem14c	1690.07	1571.86	1557.46	860.173	885.273	1024.61	-0.798698	4.47986e-17
Tbrg4	2357.59	2042.13	2160.81	1392.52	1312.33	1303.36	-0.710659	4.60672e-17
Tada1	936.39	987.969	940.528	565.802	565.731	571.764	-0.750288	4.64144e-17
Wrnip1	1454.42	1415.76	1432.19	935.677	905.37	866.684	-0.668034	4.88086e-17
Serpinf1	1782.46	1504.68	1667.06	895.535	921.447	712.565	-0.969934	5.19746e-17
Timm10b	590.694	549.311	524.024	278.122	283.368	287.309	-0.971169	5.50499e-17
Slc4a2	2897.41	2996.51	3035.58	2044.34	1914.24	1839.92	-0.622892	5.53872e-17
Fbl	4696.48	3897.54	4115.99	2602.5	2455.85	2261.37	-0.796055	5.58363e-17
Mark3	2515.38	2269.36	2261.03	1366.72	1323.39	1524.07	-0.741262	5.74766e-17
Mthfd1l	3220.27	3079.5	2860.21	1553.09	1485.17	1911.27	-0.88787	6.20481e-17
Fam73b	738.108	737.025	805.869	385.166	323.562	248.304	-1.2531	6.28308e-17
Cacna1c	795.205	777.531	810.044	389.945	396.916	470.921	-0.921289	6.51018e-17
Med16	526.33	553.263	474.962	176.813	161.781	249.255	-1.40208	7.00401e-17
2310061I04Rik	790.014	819.026	747.412	304.883	386.867	419.548	-1.08466	7.26905e-17
Bag5	1645.43	1495.78	1525.1	739.748	765.696	954.209	-0.923508	7.94865e-17
Hdac7	2217.44	2712.96	2609.68	1399.21	1429.9	1519.31	-0.794154	8.1645e-17
Trim46	913.551	905.967	919.651	506.546	495.391	388.153	-0.978942	9.76762e-17
Pole3	1009.06	901.028	944.704	475.006	443.139	560.348	-0.94856	9.85622e-17
Pop1	733.955	693.554	721.315	410.971	363.756	328.217	-0.962061	1.08434e-16
Banf1	3347.96	2927.35	2872.73	1569.34	1662.02	1909.37	-0.831378	1.11698e-16
Cd3eap	784.824	732.085	729.666	410.016	371.794	431.915	-0.887628	1.14251e-16
Phb	1644.39	1608.41	1504.22	994.933	1020.93	995.117	-0.659986	1.14997e-16
Ncapd2	3418.55	4056.6	3738.1	2160.94	2139.33	2388.85	-0.745328	1.1682e-16
Mlh1	575.122	547.335	549.076	280.034	305.474	289.212	-0.934588	1.29112e-16
Dvl2	1350.6	1267.56	1294.4	743.571	732.536	570.813	-0.934924	1.29218e-16
Cdca8	1821.91	1803.04	1768.32	1162.19	1028.97	1163.51	-0.684662	1.29495e-16
Srrt	2877.69	3274.13	3256.88	1792.03	1800.69	2037.8	-0.740677	1.29955e-16
Rbm19	1546.81	1439.47	1484.39	758.863	808.904	554.64	-1.07517	1.34883e-16
Ptpn21	2939.97	2751.49	2847.68	1741.37	1930.32	1866.56	-0.624728	1.60211e-16
Spire2	1567.57	1425.64	1372.69	829.589	670.235	571.764	-1.07549	1.61033e-16
Ccdc12	427.708	432.73	436.338	128.07	119.577	199.785	-1.53386	1.76087e-16
Tomm40l	595.885	585.865	556.384	258.052	281.358	320.607	-1.01496	1.8744e-16
St3gal3	266.799	256.872	283.933	110.867	108.524	104.649	-1.31726	1.89988e-16
Nip7	2558.98	2018.42	2019.89	1253.94	1141.51	1132.11	-0.90305	1.9251e-16
Gm10443	794.167	689.602	628.411	367.963	299.445	282.552	-1.15255	2.04948e-16
Snx17	1910.15	1824.78	1864.35	1026.47	1013.89	1225.35	-0.777539	2.07968e-16
Rhox5	4019.63	4023.01	3942.7	1626.68	1606.76	2360.31	-1.09923	2.10975e-16
Wdr83	443.28	386.296	374.75	139.539	181.878	176.952	-1.27349	2.2373e-16
Elp3	2260	1952.23	2134.72	1359.07	1258.07	1220.59	-0.725606	2.316e-16
Gm9347	1775.2	1659.79	1599.21	1091.46	953.603	962.771	-0.742846	2.5207e-16
Pold2	1241.6	1298.19	1211.93	777.023	696.361	782.014	-0.733916	2.87089e-16
Slc35c1	734.994	626.372	697.306	359.361	353.707	376.737	-0.917075	2.99877e-16
Gm10052	1013.21	927.703	970.801	374.653	355.717	534.661	-1.202	3.22032e-16
Ttll4	2035.77	2020.4	2060.6	1381.05	1385.69	1321.43	-0.581367	3.43628e-16
Apba3	1035.01	1023.54	1065.79	663.289	589.847	593.645	-0.758235	3.45549e-16
Gm20605	1371.37	1414.77	1477.08	911.783	886.278	914.252	-0.652272	3.93249e-16
Ppan	1992.16	1805.02	1829.91	794.226	791.822	1113.09	-1.05956	4.33764e-16
Nol12	1209.42	1095.66	998.985	616.457	565.731	638.359	-0.859549	4.51331e-16
Prpf3	1675.54	1676.58	1535.54	978.685	985.758	807.7	-0.818479	4.5167e-16
Anapc4	2997.07	2998.49	2985.47	1778.65	1836.87	2070.15	-0.659456	4.61286e-16
Nelfe	1293.51	1382.17	1324.67	859.217	804.885	848.609	-0.670803	4.94246e-16
Col1a1	4170.15	4965.53	4447.94	2354.01	2316.18	2851.21	-0.852759	5.01566e-16
Cops6	3003.3	2873.01	2794.44	1874.22	1662.02	1915.08	-0.669315	5.56484e-16
Yars2	536.711	516.708	508.365	269.521	264.276	212.152	-1.06656	5.57315e-16
Tsn	2078.33	2101.41	1968.74	1383.92	1357.55	1308.11	-0.602581	6.43189e-16
Cpsf1	3222.34	3377.87	3230.78	2125.58	2046.88	1740.03	-0.733709	6.52734e-16
Polr3b	923.933	888.184	924.87	544.776	520.512	566.056	-0.746091	7.66156e-16
Ndufa2	2217.44	1617.3	1691.07	983.464	737.56	789.625	-1.1378	8.06703e-16
Nudcd2	1698.38	1592.61	1580.42	1071.39	1017.91	1050.3	-0.633565	8.16644e-16
Cyth2	2646.18	2541.06	2589.85	1507.21	1477.13	1761.91	-0.71221	8.68158e-16
Eif5a	21668.8	20496.4	19525.6	12443.8	11245.3	13317.1	-0.737261	8.87737e-16
Igf2bp1	1182.43	1252.74	1180.62	732.102	742.584	779.16	-0.682004	9.14771e-16
Ppp4c	1599.75	1554.07	1436.37	950.013	949.583	823.873	-0.753384	9.22944e-16
Crtc1	678.935	645.144	697.306	337.379	370.79	389.104	-0.881271	9.81956e-16
Hirip3	936.39	965.245	1009.42	398.547	370.79	549.883	-1.14121	9.85839e-16
Szrd1	2087.67	2095.48	2118.02	1372.45	1306.3	1451.77	-0.609059	9.87132e-16
Gps1	2135.43	2009.53	1983.36	1367.67	1352.53	1274.82	-0.617329	1.00906e-15
Rnf220	2054.45	1941.36	2126.37	1281.66	1371.62	1320.48	-0.623534	1.0117e-15
Aph1a	3009.53	2830.53	2880.04	2001.34	1760.5	1740.03	-0.664292	1.01833e-15
Csk	1480.37	1642.99	1557.46	675.713	602.91	907.593	-1.09793	1.07835e-15
Bcl10	1939.22	1856.39	1810.07	1185.13	1253.05	1238.66	-0.608512	1.11962e-15
Kif14	1002.83	1099.61	1042.83	653.731	580.803	625.992	-0.757296	1.14891e-15
Abcf1	4318.61	4268.03	4271.52	2963.77	2782.43	2534.41	-0.634898	1.35347e-15
Exosc7	655.058	579.938	572.042	324.954	291.406	321.558	-0.945467	1.3754e-15
Zc3h18	3094.66	2921.42	2802.8	1914.36	2012.71	1877.97	-0.603408	1.38816e-15
Mrpl12	1965.17	1702.27	1569.98	851.571	810.914	1036.03	-0.956399	1.3992e-15
Recql4	1993.2	1836.63	2087.74	679.536	708.419	1095.96	-1.25206	1.43183e-15
Armc1	1333.99	1349.57	1326.76	838.19	892.307	809.603	-0.659186	1.43184e-15
Rnps1	1797	1519.5	1640.97	870.686	875.224	1036.98	-0.832655	1.48974e-15
Ncdn	1206.3	1158.89	1037.61	674.758	649.133	685.927	-0.759593	1.72233e-15
Fkbp2	896.941	792.351	765.158	454.936	389.882	456.65	-0.914608	1.83519e-15
Inafm2	424.594	434.706	438.426	180.636	215.038	222.617	-1.06993	1.87454e-15
Plekha6	354.001	298.367	290.196	131.893	131.635	132.238	-1.25172	1.90902e-15
Tysnd1	737.07	797.291	770.377	414.794	325.571	264.477	-1.19767	2.17205e-15
Klhl22	2542.37	2446.21	2338.27	1344.74	1203.81	1576.4	-0.828534	2.23189e-15
Spr	1736.79	1534.32	1433.24	689.094	725.502	931.377	-1.00356	2.29312e-15
Taf5l	2124.01	1965.07	2007.37	1192.77	1270.13	1371.85	-0.668712	2.38494e-15
Cdca2	1138.82	1365.37	1279.79	707.253	651.143	764.889	-0.833458	2.56856e-15
Elovl6	878.255	1107.51	882.071	425.308	523.527	469.969	-1.01609	2.66023e-15
Vps36	912.513	845.701	810.044	477.874	507.449	505.169	-0.785102	2.68714e-15
Ctps	3921	3858.02	3737.06	2660.8	2376.47	2603.86	-0.591649	2.80153e-15
Rtn2	372.687	406.055	368.487	168.212	195.946	169.341	-1.10582	3.18749e-15
Wbscr16	1328.8	1088.74	1134.69	706.297	630.041	614.575	-0.864285	3.32388e-15
Nudt16l1	474.424	433.718	445.733	222.689	217.048	240.693	-0.991979	3.32982e-15
Srebf2	3689.5	4227.52	4042.91	2467.74	2497.05	2689.48	-0.643898	3.36564e-15
Map3k11	970.648	844.713	860.15	530.44	474.289	507.072	-0.823035	3.63638e-15
Mrps22	804.548	721.217	725.491	394.724	445.149	413.839	-0.844802	3.70498e-15
Fip1l1	3243.11	2830.53	3007.39	2033.83	1898.16	1871.32	-0.645835	3.74089e-15
Josd1	2791.52	2886.84	2901.96	1033.16	1054.09	1650.6	-1.19862	3.86228e-15
Lmnb1	2651.38	2820.65	2582.54	1852.24	1697.19	1755.25	-0.602538	3.94537e-15
Rfc4	672.706	642.18	679.56	351.715	324.567	393.861	-0.897378	3.95821e-15
Clasrp	1126.37	1138.14	1155.57	748.35	688.322	714.468	-0.668674	4.18295e-15
Acsl5	3705.07	3975.59	3770.46	1739.46	1873.04	2424.05	-0.923618	4.22313e-15
D10Wsu102e	2206.02	1897.89	2104.45	1318.93	1175.67	1297.65	-0.71076	4.25612e-15
Hhipl1	315.59	291.451	295.416	127.114	140.679	107.503	-1.26691	4.35819e-15
Klf16	940.543	867.437	822.571	508.458	513.478	442.38	-0.845456	4.72097e-15
Polr2l	770.29	701.458	787.079	420.529	339.639	288.261	-1.10712	5.01752e-15
Clk2	1100.41	1130.24	1178.53	724.457	725.502	673.559	-0.6831	5.90392e-15
Ppp2r5d	2238.2	2618.12	2402.99	1551.18	1562.54	1511.7	-0.650461	6.54479e-15
Rps20	20536.2	17089.9	18071.5	11758.6	11207.1	10887.3	-0.718316	6.90292e-15
Mvk	444.318	472.249	426.943	150.052	156.757	228.325	-1.32735	7.20863e-15
Rpl38	5842.58	4738.3	4705.77	3086.11	2372.45	2493.5	-0.942761	7.33764e-15
Tmem125	226.312	160.051	205.643	64.0351	50.2425	65.6435	-1.7158	7.67489e-15
Fam110a	491.034	511.768	490.62	265.698	274.324	260.671	-0.899714	8.21749e-15
Cdc23	3394.67	3725.63	3585.7	1938.26	1902.18	2385.05	-0.782054	8.40267e-15
Phgdh	20105.4	18302.1	18491.1	12188.6	11226.2	9760.9	-0.778268	8.50897e-15
Gm36569	261.608	306.27	235.915	73.5925	113.548	78.0111	-1.60281	8.76153e-15
Gm5898	357.116	281.571	322.556	147.185	119.577	125.579	-1.29161	9.08059e-15
Dnaja3	3101.92	3035.04	3058.54	1505.3	1535.41	2007.36	-0.865027	9.25349e-15
Ints3	2095.98	2227.87	2181.69	1402.08	1299.27	1095.01	-0.77719	9.51331e-15
Ptma	22208.6	21618.7	21339.9	13839.2	13405.7	15157	-0.619996	9.53572e-15
Suv39h2	528.406	596.733	531.331	285.768	289.397	306.336	-0.910337	1.21428e-14
Akt1s1	1689.03	1477.01	1530.32	981.553	998.821	884.76	-0.713005	1.48471e-14
Bysl	1699.41	1353.52	1470.82	849.659	820.962	648.824	-0.963793	1.50705e-14
Clcn4	972.725	967.221	1013.6	620.28	628.031	592.694	-0.682029	1.52617e-14
Gm12184	492.072	487.069	455.128	253.273	261.261	235.936	-0.934976	1.58995e-14
Pcif1	1189.69	1310.05	1229.68	522.794	540.609	749.668	-1.04024	1.60175e-14
Gm8203	782.747	934.618	804.825	483.608	373.804	356.758	-1.05469	1.61392e-14
Taok2	1285.2	1392.05	1467.68	835.323	747.608	880.003	-0.750585	1.71081e-14
Dhx30	1877.97	1701.28	1848.7	772.244	791.822	1110.23	-1.02091	1.73585e-14
Setdb1	2350.32	2317.77	2480.24	1498.61	1582.64	1660.11	-0.592216	1.76433e-14
Idh3g	2968	2741.61	2634.73	1384.88	1423.87	1810.43	-0.853001	1.78851e-14
Akt1	6608.71	6638.16	6338.39	2504.06	2475.95	3880.58	-1.14421	1.88532e-14
Abhd17a	1018.4	979.077	947.835	322.087	263.271	505.169	-1.43263	2.01168e-14
Suds3	2142.69	2127.1	2168.12	1452.74	1415.83	1239.62	-0.648207	2.14477e-14
Polr3e	931.2	897.076	871.633	387.078	396.916	540.37	-1.02714	2.276e-14
Zfp207	4304.07	4527.86	4575.29	2683.74	2783.43	3148.03	-0.638001	2.325e-14
Top2a	10995.8	12654.9	11707	6423.58	6354.67	7783.03	-0.782078	2.34862e-14
Smg5	4262.55	4196.89	4270.48	2741.08	2662.85	3051	-0.590223	2.38518e-14
Tomm7	1028.78	842.737	670.166	334.512	336.625	415.742	-1.22534	2.64591e-14
Ascc2	4313.42	3478.64	4067.97	2382.68	2475.95	2160.53	-0.756721	2.74958e-14
Lztr1	1766.89	1810.95	1848.7	943.323	906.375	1191.1	-0.835263	2.76092e-14
Thap3	877.217	1008.72	914.431	306.795	337.63	509.926	-1.2782	3.00449e-14
Eif3a	18280.4	15874.7	16768.8	11344.7	10794.1	10266.1	-0.652113	3.06721e-14
Isy1	1281.05	1221.13	1231.77	637.484	683.298	812.457	-0.807408	3.13987e-14
Zfp865	1313.23	1233.97	1364.34	817.164	790.817	861.928	-0.662855	3.14057e-14
Ruvbl1	1996.32	1888.01	1810.07	1277.83	1060.12	1061.71	-0.743979	3.15025e-14
Gnb1l	192.053	224.269	223.389	78.3713	84.4074	82.7679	-1.382	3.37827e-14
Hspd1	31954.6	28625.4	30612.6	19650.2	20095	18136.6	-0.655809	3.47259e-14
Snx15	431.861	356.657	425.9	182.548	200.97	192.174	-1.0767	3.57621e-14
Nifk	2033.69	1699.31	1783.98	1028.38	1090.26	1178.73	-0.742374	3.74193e-14
Sdha	5367.11	5009.99	4940.64	3103.31	2936.17	3539.04	-0.677202	3.84272e-14
Mtg1	334.277	332.945	387.276	125.203	123.597	175.049	-1.31369	4.82421e-14
4632415L05Rik	475.462	519.672	507.322	231.291	250.208	285.406	-0.970132	5.08336e-14
Ccnb1ip1	52.9445	84.9653	76.2026	10.5132	3.01455	0.951355	-3.88188	5.46263e-14
Tmem171	2098.05	1695.35	1789.2	1150.72	1074.18	1111.18	-0.742521	5.47302e-14
Mark2	2394.96	2147.84	2286.08	1522.51	1539.43	1400.39	-0.613853	5.54153e-14
Mum1	766.137	964.258	909.212	350.759	345.668	493.753	-1.14879	5.73493e-14
Ubl4a	1902.89	1567.91	1794.42	1100.07	1082.22	1032.22	-0.711698	5.7791e-14
Gm10282	1313.23	1743.76	1753.7	749.306	704.4	916.155	-1.02126	6.10835e-14
Bcl7c	1049.55	972.161	952.011	410.016	345.668	564.153	-1.17118	6.47489e-14
Ints1	2582.86	2727.78	2563.75	1640.06	1537.42	1199.66	-0.847342	6.62602e-14
Hnrnpm	7643.73	7535.24	7701.68	5303.44	5224.21	4593.14	-0.597629	6.74906e-14
D2hgdh	211.778	246.004	212.95	59.2563	68.3298	96.0869	-1.58381	6.99463e-14
Cluh	3375.99	3102.22	3108.65	2172.41	1961.47	1760.01	-0.701822	6.99864e-14
Ing5	961.305	968.209	899.817	501.767	502.425	606.964	-0.812087	7.03688e-14
Ube2m	4572.95	4159.35	4066.92	2970.46	2642.76	2681.87	-0.625635	7.36606e-14
Tfdp1	4953.94	5123.61	5118.1	3358.5	3161.26	3643.69	-0.580163	7.56778e-14
Pptc7	1586.26	1377.23	1466.64	841.058	925.467	956.112	-0.702226	8.19471e-14
Akap8	2249.62	2226.88	2250.59	1516.77	1556.51	1353.78	-0.603822	8.25959e-14
Pcnt	1359.95	1501.71	1505.26	797.093	831.011	966.577	-0.750944	8.26882e-14
Srsf6	6424.97	5473.35	5840.46	3828.72	3962.12	3579.95	-0.641575	8.41727e-14
Hnrnpl	8995.37	9573.42	9014.87	5000.47	5068.46	6278.94	-0.754677	8.47217e-14
1600014C10Rik	483.767	524.611	516.716	182.548	220.062	276.844	-1.16627	9.0758e-14
Lsm6	965.458	994.885	960.362	392.812	353.707	566.056	-1.15329	9.18408e-14
Gfer	1165.82	1073.92	1096.07	538.086	537.595	706.857	-0.903628	9.85414e-14
Gja1	2265.19	2711.97	2639.95	894.58	958.627	1472.7	-1.19535	1.05129e-13
Pop7	458.852	423.839	445.733	122.336	115.558	214.055	-1.55415	1.07617e-13
Shfm1	2670.06	2438.31	2347.67	1471.85	1229.94	1598.28	-0.793736	1.08123e-13
Mrps26	2490.47	2231.82	2309.04	1266.37	1180.7	1553.56	-0.813255	1.08346e-13
Lrch4	1151.28	1212.24	1219.24	775.111	737.56	798.187	-0.632438	1.14207e-13
Mtrr	683.087	667.867	724.447	286.724	306.479	408.131	-1.05089	1.15516e-13
Srebf1	2017.08	2695.18	2342.45	1106.76	1121.41	1417.52	-0.952376	1.15741e-13
Mtbp	2375.23	2597.37	2472.93	1635.28	1583.64	1750.49	-0.583249	1.1803e-13
Ttc9c	949.886	1151.97	1024.04	619.324	625.017	603.159	-0.75912	1.27138e-13
Cep89	681.011	771.604	703.569	278.122	293.416	412.888	-1.13076	1.27679e-13
Dhrs4	448.471	445.574	400.847	160.566	179.868	232.131	-1.17697	1.27826e-13
Mrps2	1280.01	1254.72	1115.9	636.528	682.293	782.965	-0.796486	1.34196e-13
2210016L21Rik	582.389	601.673	670.166	342.158	316.528	359.612	-0.864023	1.38725e-13
Srm	7304.26	6237.05	6468.87	3932.9	3723.97	2763.69	-0.941334	1.47291e-13
S100a4	12082.8	10969.4	9859.37	4607.66	4581.11	6657.58	-1.0544	1.52816e-13
Nubp2	726.689	776.543	731.754	383.255	353.707	461.407	-0.898661	1.60382e-13
Rhot2	1342.3	1505.66	1395.66	936.632	816.943	760.133	-0.755571	1.63906e-13
Nacc1	4126.55	4406.34	4172.35	2998.18	2839.71	2597.2	-0.591033	1.67476e-13
Ube2s	5760.56	5187.82	5192.22	3127.21	2957.27	3678.89	-0.725117	1.73351e-13
Qars	1463.76	1673.62	1565.81	907.96	840.055	1036.98	-0.755762	1.79834e-13
Nol9	2783.22	2591.44	2578.36	1762.4	1760.5	1487.92	-0.666577	1.90828e-13
Ndufa5	932.238	794.327	779.772	419.573	378.828	496.607	-0.951925	1.91614e-13
Zfp444	516.987	482.129	551.164	287.68	209.009	250.206	-1.05233	1.95224e-13
Ptger1	829.463	841.749	831.966	534.263	502.425	524.197	-0.6812	1.95739e-13
Npepl1	4520	3979.54	4015.77	1598.01	1561.54	2503.01	-1.14401	2.02351e-13
Ubn1	1693.18	1577.79	1676.46	1039.85	1085.24	1144.48	-0.597396	2.05566e-13
4930427A07Rik	467.157	569.07	548.033	174.902	166.805	273.039	-1.36495	2.06052e-13
Mettl3	751.604	668.855	726.535	415.75	431.081	368.174	-0.821533	2.06372e-13
Traf3ip1	503.491	630.324	599.182	311.574	300.45	298.725	-0.928424	2.28616e-13
Gm41291	263.684	237.113	268.275	122.336	101.49	99.8923	-1.24748	2.30671e-13
Ermp1	1915.34	1902.83	2011.54	1144.99	1335.45	1287.18	-0.629924	2.33999e-13
Fbxl8	366.459	340.849	313.161	98.442	137.664	160.779	-1.36261	2.46002e-13
E130309D02Rik	1241.6	1131.22	1147.21	679.536	752.633	585.083	-0.803629	2.51661e-13
Rcc1	1972.44	2089.55	1983.36	967.216	959.632	1319.53	-0.896776	2.5379e-13
Rn18s-rs5	84490	73652.1	71900.8	30306.7	38585.2	42615.9	-1.04476	2.5714e-13
Pdzd7	645.715	617.48	729.666	255.185	281.358	377.688	-1.1236	2.73784e-13
Eva1b	668.554	804.207	776.64	293.414	270.305	420.499	-1.19189	2.7448e-13
Trmt2a	1369.29	1340.67	1365.38	788.492	784.788	935.182	-0.699784	2.76052e-13
Zdhhc4	839.844	854.593	833.01	358.405	386.867	516.586	-1.00177	2.78552e-13
Urm1	1033.97	909.919	936.353	525.661	545.634	616.478	-0.770716	2.84288e-13
1810043H04Rik	215.93	197.594	200.423	76.4598	62.3007	89.4274	-1.42581	3.13535e-13
1810032O08Rik	792.091	599.697	662.858	218.866	227.096	356.758	-1.35513	3.16593e-13
Rai1	3595.03	3153.6	3525.15	2270.86	2150.38	2357.46	-0.599658	3.22882e-13
Bcl2l2	1594.56	1575.81	1623.22	997.8	1032.99	1128.31	-0.601435	3.23109e-13
Zbtb12	445.356	524.611	509.409	152.92	109.529	231.179	-1.58211	3.2602e-13
Brix1	1731.6	1532.34	1603.39	1082.86	946.569	1044.59	-0.662571	3.32399e-13
Csnk1g2	2312.95	2456.09	2247.46	1521.55	1382.67	1623.96	-0.631667	3.56971e-13
Arl6ip4	936.39	813.098	911.3	271.432	228.101	457.602	-1.47419	3.5789e-13
Top3b	954.038	1000.81	970.801	554.333	632.051	623.137	-0.693511	3.59193e-13
Chaf1a	1735.75	2051.02	1820.51	1228.14	1186.73	1117.84	-0.666786	3.82985e-13
Tmpo	8547.93	9299.75	8796.71	5435.34	5608.07	6333.17	-0.616682	3.84545e-13
Avpi1	2363.81	1801.07	1891.5	854.438	810.914	1189.19	-1.08486	4.11456e-13
Armc6	603.152	447.55	533.418	226.512	211.018	278.747	-1.14399	4.15027e-13
9130401M01Rik	1358.91	1215.2	1286.05	418.617	478.309	736.349	-1.24054	4.17622e-13
Elp6	414.213	337.885	365.355	166.3	163.791	194.076	-1.09117	4.5645e-13
Aven	338.429	347.765	351.785	186.371	166.805	157.925	-1.02199	4.59376e-13
Fbxo6	1366.17	1187.54	1116.94	474.051	476.299	718.273	-1.13696	4.60553e-13
1110004E09Rik	474.424	442.61	490.62	114.69	110.533	222.617	-1.65094	4.71676e-13
Mcu	1250.94	1241.88	1278.74	760.775	776.749	871.441	-0.646501	4.87004e-13
Mydgf	1537.47	1377.23	1469.77	993.022	834.025	841.949	-0.715753	5.02066e-13
U2af1l4	480.653	456.442	495.839	275.255	231.115	255.914	-0.90965	5.10596e-13
Mlst8	670.63	687.626	717.14	310.618	345.668	424.304	-0.94125	5.58542e-13
Gcat	932.238	1105.54	1008.38	646.085	529.556	542.272	-0.82627	5.62085e-13
Rpf2	1095.22	995.873	973.932	524.705	637.075	623.137	-0.780285	5.64261e-13
Smo	3087.39	3301.79	3075.25	1811.14	1774.57	2208.09	-0.707897	6.3667e-13
1110008F13Rik	3033.41	2911.54	2686.93	2013.76	1789.64	1896.05	-0.598744	6.64165e-13
Fau	10888.9	8974.71	8740.34	4019.87	4024.42	5820.39	-1.04474	6.7386e-13
Heatr3	3258.68	3089.38	2970.86	1666.82	1757.48	2143.4	-0.742969	7.0135e-13
Itgbl1	1115.99	1160.86	1205.67	546.688	682.293	728.738	-0.831075	7.62011e-13
As3mt	519.063	520.66	528.199	227.468	276.334	303.482	-0.957784	7.62659e-13
Arf6	5851.92	5474.34	5298.69	3016.34	3085.89	3833.01	-0.742643	7.94329e-13
Ccdc137	1218.76	1139.13	1093.98	770.332	721.482	707.808	-0.650037	7.96803e-13
Chtf18	676.859	850.641	670.166	269.521	220.062	385.299	-1.32819	8.23748e-13
Rgl2	913.551	979.077	894.598	609.767	526.541	560.348	-0.715978	8.51237e-13
Tars2	1812.57	1785.26	1684.81	936.632	879.244	1182.53	-0.816753	8.82759e-13
Zgpat	719.422	648.108	717.14	412.883	404.955	335.828	-0.853705	9.08987e-13
Scd1	9947.33	10488.3	10154.8	6480.92	6957.58	5504.54	-0.691483	9.43816e-13
Cetn3	1210.46	1145.06	1196.28	488.387	525.537	739.203	-1.01823	9.70526e-13
Rplp1	35511.2	27611.8	28801.5	15960	14040.8	18306.9	-0.928171	1.03945e-12
Clpb	2240.28	1942.35	2009.45	1303.64	1407.79	1223.44	-0.654225	1.05544e-12
Gtf2h5	1503.21	1334.75	1340.33	914.65	909.389	900.933	-0.616554	1.0911e-12
Rnf126	1711.87	1704.25	1687.94	1206.15	1141.51	1052.2	-0.586233	1.16912e-12
Ak5	768.214	738.013	704.613	341.202	412.993	449.991	-0.876648	1.19194e-12
Pithd1	1198	1200.38	1153.48	816.208	731.531	768.695	-0.616452	1.21113e-12
Smdt1	1329.84	1314.99	1235.94	559.112	594.871	822.922	-0.972822	1.26698e-12
Agpat3	2322.29	2117.22	2166.03	824.81	794.836	1332.85	-1.16145	1.35129e-12
Gps2	2686.67	2264.42	2393.6	1665.87	1510.29	1512.65	-0.647283	1.35467e-12
6030419C18Rik	390.336	287.499	358.048	151.008	164.795	143.655	-1.17277	1.3723e-12
Tcof1	5556.05	5188.81	5453.19	3670.07	3583.29	2989.16	-0.661287	1.41141e-12
Rpf1	1084.84	938.57	1040.74	609.767	606.929	664.997	-0.702975	1.41683e-12
Fbxo22	860.607	972.161	899.817	561.024	569.75	579.375	-0.676422	1.50768e-12
Trim47	1386.94	1468.12	1339.29	535.219	538.6	850.511	-1.12377	1.52695e-12
Msl3	1667.23	1738.83	1635.75	986.331	1087.25	1173.02	-0.635095	1.537e-12
Prrc2a	15580.2	15299.7	16018.2	10735	9532.01	8359.56	-0.712175	1.5577e-12
Gmds	829.463	796.303	778.728	506.546	506.444	504.218	-0.664309	1.65065e-12
Pcolce	12467.9	12809	12131.9	7580.99	7979.51	8989.35	-0.607656	1.69739e-12
Gart	2212.25	2546	2209.88	1420.24	1455.02	1593.52	-0.640991	1.78192e-12
Gm5854	771.328	703.434	751.588	399.502	271.309	402.423	-1.05161	1.81112e-12
Ndufa8	1001.79	1208.29	973.932	616.457	634.06	624.089	-0.764731	1.86015e-12
Sdr39u1	1281.05	1278.43	1195.23	723.501	762.681	860.976	-0.677717	1.88415e-12
Pja1	1303.89	1246.82	1205.67	772.244	712.439	856.219	-0.681863	1.90724e-12
Itgb5	3865.98	3400.59	3548.12	2204.91	2138.32	2535.36	-0.652621	1.94993e-12
Tspan9	4909.3	4734.35	4812.25	2476.34	2669.89	3339.26	-0.768509	2.02913e-12
AI506816	1619.48	1604.46	1834.08	1081.91	1131.46	981.798	-0.662782	2.20634e-12
Dnajb1	1001.79	1007.73	997.941	604.032	604.92	688.781	-0.664005	2.24637e-12
Abcb7	1668.27	1467.13	1489.6	993.977	1020.93	1028.41	-0.603697	2.29503e-12
Rpl36	10046	8060.84	8284.16	5097.96	4431.39	5593.02	-0.803273	2.34067e-12
Brpf3	1539.54	1604.46	1595.04	1039.85	992.792	804.846	-0.740198	2.38067e-12
Akt2	3107.11	2883.88	2932.24	1928.7	1818.78	2144.35	-0.59862	2.42218e-12
Cnpy3	1378.63	1417.74	1345.55	870.686	810.914	964.674	-0.646047	2.48359e-12
Hmgb1-ps2	250.189	269.715	266.187	107.044	101.49	134.141	-1.19687	2.50924e-12
Fbxo31	694.507	706.398	711.92	320.175	443.139	359.612	-0.912834	2.58678e-12
Safb2	1493.86	1702.27	1795.46	1072.35	916.423	797.235	-0.84132	2.63353e-12
Dnajc22	483.767	565.118	485.4	201.663	262.266	278.747	-1.04737	2.71097e-12
Med30	714.231	613.529	635.718	222.689	261.261	370.077	-1.20054	2.75283e-12
Mrps14	1073.42	945.486	947.835	609.767	572.764	641.213	-0.701518	2.77773e-12
Rps18	1829.18	1560.99	1248.47	815.253	638.08	831.484	-1.02132	2.80418e-12
Zfp598	8083.89	6934.55	7439.67	4899.16	4694.66	3862.5	-0.738962	2.82359e-12
Eef1g	13511.2	12674.7	12427.3	8380.95	8024.73	9274.76	-0.588381	2.82846e-12
Wdr83os	936.39	800.255	763.07	486.475	471.275	383.396	-0.898506	2.92385e-12
Rfc5	1366.17	1508.63	1406.09	615.501	599.895	903.787	-1.01409	2.93899e-12
Ehmt2	5095.13	5504.96	5211.01	3410.11	2908.04	3647.49	-0.665792	3.10697e-12
Wdr18	1368.25	1177.66	1119.03	722.545	705.405	544.175	-0.894254	3.13186e-12
Thop1	594.847	649.095	629.455	379.432	292.411	349.147	-0.875	3.15762e-12
Tatdn2	1569.65	1544.2	1604.43	1033.16	1050.07	853.365	-0.684352	3.16498e-12
Ado	1042.28	1111.46	1020.91	456.847	532.57	670.705	-0.935226	3.19001e-12
Espnl	387.221	405.067	399.803	215.043	198.96	225.471	-0.898034	4.10679e-12
Mknk1	1683.84	1517.52	1576.25	1019.78	1058.11	853.365	-0.704972	4.32535e-12
D830031N03Rik	1950.64	2046.08	2001.1	887.889	1010.88	1321.43	-0.897171	4.42284e-12
Pwp1	2848.62	2474.86	2725.55	1670.65	1807.73	1859.9	-0.592334	4.71168e-12
E2f8	1345.41	1553.09	1479.17	758.863	780.768	979.896	-0.796876	5.15871e-12
Acbd6	1419.12	1299.18	1316.32	879.288	875.224	935.182	-0.584741	5.18605e-12
Gtf2h4	533.597	564.13	509.409	325.91	302.46	283.504	-0.817874	5.39862e-12
Coa3	734.994	686.638	587.7	331.644	322.557	402.423	-0.926892	5.5132e-12
Pick1	584.465	551.287	528.199	302.972	295.426	343.439	-0.820595	5.52088e-12
Mrpl44	503.491	458.418	449.909	264.742	254.227	270.185	-0.838786	5.63008e-12
Gm3756	470.271	625.384	567.866	296.282	233.125	285.406	-1.02931	5.90964e-12
Trub1	987.258	916.835	944.704	459.714	479.313	623.137	-0.866356	6.12091e-12
Snhg12	1394.2	1234.96	1188.97	813.341	711.434	821.019	-0.702366	6.3333e-12
Cox6a1	5701.39	4955.65	5033.55	3012.52	2628.69	3529.53	-0.774638	6.36713e-12
Rnpep	819.082	936.594	913.388	434.865	432.085	571.764	-0.891214	6.54497e-12
Nudt21	2608.81	2562.79	2414.47	1329.44	1379.66	1761.91	-0.762614	6.82335e-12
Hnrnpa0	7423.64	7527.33	6992.9	4758.67	4289.7	5238.16	-0.619091	6.89839e-12
Lsm4	2099.09	1971	1748.48	1265.41	1132.47	1279.57	-0.661788	6.96103e-12
Ldlr	2070.02	2617.13	2353.93	1140.21	1184.72	1527.88	-0.869845	6.99553e-12
Pcdh18	722.536	1029.46	757.851	308.706	233.125	428.11	-1.37113	7.01413e-12
Dnmt1	4651.85	5271.8	5009.54	2860.55	2845.74	3517.16	-0.695093	7.29907e-12
Tmem208	656.096	558.202	504.19	302.016	253.222	315.85	-0.979506	7.64949e-12
Snrpd3	1656.85	1628.17	1545.97	1157.41	1048.06	1023.66	-0.581133	8.34264e-12
Rpl11	12695.2	11021.8	10993	5654.2	5400.06	7636.53	-0.892971	8.70523e-12
Foxg1	1770.01	1699.31	1621.13	1182.26	1149.55	1025.56	-0.600606	8.86263e-12
Lime1	484.805	493.984	504.19	292.459	294.421	263.525	-0.802611	8.94457e-12
Pqbp1	594.847	538.443	557.427	350.759	318.537	308.239	-0.790086	9.46567e-12
Rexo2	2003.58	1818.85	1655.58	960.526	1075.19	1215.83	-0.752491	1.01133e-11
Exoc8	584.465	589.817	609.621	311.574	334.615	379.591	-0.798064	1.01912e-11
Bola1	556.436	494.972	505.234	228.424	239.154	312.996	-0.995143	1.02309e-11
Ssr4	2574.55	2040.16	2122.19	1407.82	1352.53	1420.37	-0.688138	1.03429e-11
Nudt3	2132.31	2055.96	2036.59	908.916	947.574	1371.85	-0.947021	1.03746e-11
Gale	286.523	353.693	290.196	133.805	120.582	159.828	-1.16705	1.06182e-11
Slc27a4	896.941	882.256	809	570.581	474.289	450.942	-0.790921	1.08521e-11
Tmem101	289.637	282.559	288.109	143.362	141.684	104.649	-1.14331	1.11632e-11
Pagr1a	377.878	490.033	400.847	130.937	102.495	207.395	-1.52399	1.12131e-11
Plk1	1873.82	1873.19	1839.3	1128.74	916.423	652.63	-1.05019	1.18013e-11
Gna11	781.709	873.364	914.431	543.82	521.517	526.099	-0.691116	1.19258e-11
Gm44504	988.297	828.906	908.168	567.714	544.629	569.862	-0.69562	1.27344e-11
Gm8730	40112.2	35559	36925.9	21576	19290.1	24977.8	-0.774028	1.28475e-11
Bloc1s4	695.545	657.987	696.262	423.396	429.071	360.564	-0.757137	1.33119e-11
Gm17828	103.813	101.761	100.212	21.0264	33.16	31.3947	-1.83908	1.34874e-11
Ptgfrn	2115.7	2359.27	2106.53	1129.69	1373.63	1467.94	-0.728984	1.4193e-11
Anln	12037.1	11418.9	11462.8	7138.48	7059.07	8487.99	-0.622185	1.45429e-11
Epb41l1	2836.16	2650.72	2700.5	1742.33	1667.05	1995.94	-0.598787	1.472e-11
Cdc20	3001.22	3016.27	2932.24	2084.49	1753.46	1524.07	-0.739071	1.52753e-11
Tsen34	1387.98	1463.18	1369.56	897.447	846.084	999.874	-0.621304	1.57608e-11
4930579G24Rik	249.15	268.728	268.275	133.805	125.606	107.503	-1.09983	1.63063e-11
Mrpl2	1500.09	1397.98	1400.88	817.164	678.274	953.258	-0.811437	1.64778e-11
Cdsn	3354.19	2829.54	3101.34	1727.04	1767.53	2152.92	-0.71711	1.70172e-11
Tln2	1550.96	1713.14	1494.82	679.536	776.749	1030.32	-0.936386	1.7251e-11
Tdp1	846.073	865.461	911.3	580.139	563.721	564.153	-0.618678	1.77264e-11
Sart3	1695.26	1852.44	1658.71	1120.14	1138.5	897.128	-0.722678	1.80238e-11
Npm1	26420.3	22998.9	24638.5	14085.8	14654.7	17111.1	-0.691659	1.90182e-11
Dnttip1	1346.45	1149.01	1191.06	768.421	802.875	661.192	-0.723783	2.02736e-11
Zranb2	1839.56	1918.64	1861.22	1144.03	1163.62	1366.15	-0.613018	2.06809e-11
Ttc7	1817.76	1743.76	1754.75	1059.92	951.593	1248.18	-0.705286	2.09344e-11
Zbtb45	311.438	331.958	305.854	153.875	156.757	174.098	-0.969577	2.1335e-11
Myo19	887.598	905.967	945.748	410.971	515.488	582.229	-0.860533	2.25344e-11
Fxr2	3150.71	3046.9	2898.83	2185.79	2055.92	1838.02	-0.581357	2.27542e-11
Tm9sf1	1886.28	1867.26	1904.02	1382.01	1186.73	1155.9	-0.602936	2.30943e-11
Mrps12	348.811	358.633	325.688	167.256	172.834	195.028	-0.949017	2.36641e-11
Znhit2	347.772	328.006	304.81	143.362	155.752	181.709	-1.02788	2.39116e-11
Mrpl57	741.222	598.709	654.507	396.635	348.683	386.25	-0.816884	2.39644e-11
Ranbp1	4705.83	4228.51	4335.2	2860.55	2721.13	3221.29	-0.5919	2.46326e-11
Psmg1	485.843	448.538	448.865	238.937	238.149	282.552	-0.864056	2.50616e-11
Rpl28	16845.7	14730.6	15223.8	8920.95	8537.21	10857.8	-0.724855	2.58488e-11
2810428I15Rik	1161.66	1068.98	1128.43	483.608	487.352	724.932	-0.985535	3.10877e-11
Plekha3	2582.86	2169.58	2171.25	1432.67	1408.8	1585.91	-0.644888	3.64209e-11
Gm6439	85.1264	79.0375	86.6413	22.9379	24.1164	19.0271	-1.92535	3.93259e-11
LOC108167952	515.949	408.031	425.9	235.114	205.994	145.557	-1.20238	4.047e-11
Pin4	401.755	296.391	395.627	184.459	164.795	165.536	-1.0863	4.09249e-11
Gramd1b	835.692	708.374	778.728	325.91	438.115	458.553	-0.925989	4.29263e-11
0610030E20Rik	907.323	976.113	944.704	630.793	631.046	562.251	-0.633068	4.31148e-11
Psmg2	800.396	693.554	801.693	455.892	448.163	492.802	-0.716086	4.36883e-11
Fam83d	644.677	575.986	558.471	327.821	372.799	335.828	-0.779953	4.39125e-11
Tubb4b	5256.03	5912.99	5308.09	2450.54	2430.73	3667.47	-0.946608	4.83217e-11
Dpp9	3486.03	3544.83	3489.66	2383.63	2391.54	1884.63	-0.659796	5.10775e-11
Zmiz2	1620.52	1586.68	1684.81	883.111	912.404	1155.9	-0.728734	5.18666e-11
Adat3	184.787	195.618	192.072	86.0173	86.4171	79.9138	-1.18229	5.27527e-11
Gm13192	88.2408	104.725	77.2465	21.9822	17.0824	28.5406	-1.9965	5.86631e-11
Pex6	1003.87	997.848	1073.1	672.846	531.566	654.532	-0.725318	5.90468e-11
Pomt1	633.257	728.133	638.849	322.087	272.314	410.985	-0.9918	6.68785e-11
Rpl13	33362.3	28142.3	30132.4	11395.4	11997.9	18894.9	-1.11566	6.71105e-11
Fam53a	974.801	942.522	972.888	535.219	509.459	664.997	-0.756893	6.77519e-11
Stc2	177.52	206.485	174.327	57.3448	55.2667	88.476	-1.47203	6.89697e-11
Gm4786	560.588	410.995	320.469	180.636	161.781	101.795	-1.54077	6.93785e-11
Samd14	797.281	809.146	763.07	403.325	403.95	529.905	-0.824978	6.99495e-11
Ndufa4	3584.65	3410.47	3265.23	2517.44	2212.68	2079.66	-0.591372	7.39882e-11
Mrps18a	741.222	749.868	740.105	497.944	477.304	476.629	-0.619856	7.75268e-11
Fastkd2	830.501	717.265	789.167	462.582	496.396	386.25	-0.797083	7.81747e-11
Tep1	1650.62	1592.61	1743.27	955.747	983.748	1193.95	-0.669979	8.21678e-11
Spn	756.794	686.638	697.306	418.617	477.304	410.985	-0.712408	8.73796e-11
Por	7434.02	7235.88	7554.5	5193.53	4895.63	4010.91	-0.656468	8.91755e-11
Mrps15	886.56	781.483	818.395	483.608	508.454	556.543	-0.682779	9.01603e-11
Pim3	7224.32	6313.12	6466.78	4604.79	4389.18	3685.55	-0.657817	9.44369e-11
Sdhd	2359.66	1992.73	2037.64	1488.1	1366.6	1310.02	-0.617475	9.57305e-11
Jade2	814.929	877.316	837.185	547.643	556.687	564.153	-0.600473	9.64408e-11
Lzic	1045.39	971.173	1001.07	550.51	566.735	700.197	-0.731098	1.02386e-10
BC031181	761.985	680.71	667.034	429.131	434.095	449.04	-0.684818	1.05539e-10
Dpf1	216.968	315.162	234.871	105.132	106.514	112.26	-1.24447	1.062e-10
2410016O06Rik	265.76	227.233	254.705	90.796	114.553	127.482	-1.16741	1.22007e-10
Oaz1	5861.26	6101.7	5311.22	4002.67	3956.09	3366.85	-0.609128	1.23804e-10
Saysd1	222.159	180.798	207.73	83.15	97.4704	85.6219	-1.19804	1.28911e-10
Sh3bp5l	803.51	783.459	831.966	550.51	463.236	428.11	-0.746215	1.35883e-10
Det1	450.547	407.043	376.838	207.397	234.13	231.179	-0.876089	1.3704e-10
Tfeb	512.835	532.515	496.883	268.565	330.596	287.309	-0.799868	1.41405e-10
Dhodh	260.57	303.306	272.45	112.778	148.718	136.044	-1.07436	1.45781e-10
Atp2a3	748.489	485.093	616.928	302.016	274.324	178.855	-1.29306	1.47473e-10
Mrpl14	604.19	553.263	491.664	158.654	118.572	283.504	-1.55516	1.61581e-10
Khk	548.131	524.611	460.347	157.698	170.824	289.212	-1.3107	1.65694e-10
Yeats4	934.314	918.811	807.957	468.316	550.658	578.424	-0.736542	1.66959e-10
Thap7	415.251	397.163	432.163	166.3	190.921	249.255	-1.03653	1.67811e-10
Prmt7	1617.4	1370.31	1437.41	951.924	921.447	1025.56	-0.609834	1.69002e-10
Ephx1	2454.13	2485.73	2537.65	1241.52	1381.67	1769.52	-0.76733	1.75019e-10
Zfp787	646.753	705.41	610.665	391.856	385.862	423.353	-0.708725	1.82231e-10
Mypop	262.646	280.583	281.845	147.185	141.684	115.114	-1.03087	1.8662e-10
Taf15	7838.89	6262.73	7232.99	4675.52	4593.17	3794	-0.707738	1.98227e-10
Fam58b	383.069	354.681	378.925	203.574	172.834	218.812	-0.906441	2.08893e-10
Gm14410	147.414	240.076	198.336	73.5925	63.3055	77.0598	-1.45305	2.14287e-10
Myl6	9304.73	7370.25	7589.99	5164.86	4607.24	5354.23	-0.681733	2.22685e-10
Smg9	1448.19	1406.87	1371.65	716.811	634.06	961.82	-0.86952	2.26233e-10
Tmem238	657.134	562.154	582.48	292.459	244.179	371.028	-0.988126	2.26496e-10
Bcl2	731.879	796.303	766.202	392.812	404.955	518.488	-0.801366	2.39802e-10
Pced1a	506.606	493.984	535.506	307.751	294.421	323.461	-0.730169	2.39945e-10
Rbm15b	1138.82	1132.21	1132.6	812.385	734.545	664.046	-0.622413	2.4571e-10
Gtpbp3	635.333	730.109	671.209	403.325	368.78	446.185	-0.741066	2.64032e-10
Ufc1	1070.31	1014.64	967.669	665.2	629.036	714.468	-0.60345	2.7428e-10
Foxk2	2864.19	2886.84	2877.95	1914.36	2062.96	1588.76	-0.63275	2.76225e-10
Zfp518b	1250.94	1273.49	1312.15	744.527	830.006	919.009	-0.621561	2.81749e-10
Bap1	2170.72	1920.61	2017.8	1361.94	1397.75	1109.28	-0.659155	2.90089e-10
Snhg6	620.8	547.335	634.674	348.848	307.484	382.445	-0.794321	2.95687e-10
Ercc1	3615.79	3048.87	3484.44	2314.82	2336.28	1999.75	-0.609732	3.18201e-10
Atf6b	2361.74	2255.53	2092.96	1498.61	1460.05	1128.31	-0.715511	3.2329e-10
Mrpl18	1281.05	1470.1	1272.48	820.987	844.074	942.793	-0.625761	3.25882e-10
Plpp1	429.784	509.792	481.225	281.945	243.174	277.796	-0.823078	3.31848e-10
Pwp2	1938.18	1709.19	1717.17	1183.22	1060.12	814.36	-0.811076	3.33789e-10
Esr1	551.245	583.89	599.182	288.636	324.567	377.688	-0.807419	3.34723e-10
Pes1	3656.28	3150.63	3450	2340.63	2179.52	1750.49	-0.70992	3.38994e-10
Rps19	14789.2	13295.1	12200.8	8251.92	7862.95	9483.11	-0.654182	3.45745e-10
Zfp628	615.609	645.144	631.542	412.883	376.819	316.801	-0.774404	3.6002e-10
Spns2	887.598	906.955	768.289	280.99	292.411	514.683	-1.23551	3.70064e-10
Zfp593	1095.22	833.846	902.949	441.555	408.974	595.548	-0.969039	3.7401e-10
Cenpw	307.285	320.102	287.065	108.955	107.519	172.195	-1.23333	3.75171e-10
Ssbp3	698.659	743.94	721.315	466.405	458.212	487.094	-0.616157	3.76328e-10
Dusp9	926.009	784.447	807.957	505.59	473.284	560.348	-0.709705	3.81552e-10
Ocel1	265.76	271.691	213.994	54.4776	39.1891	111.309	-1.872	4.10632e-10
Csrp2bp	929.123	1159.88	1019.86	433.909	456.202	667.851	-0.996528	4.24533e-10
Mrpl38	1132.6	932.643	1043.87	691.005	636.07	559.397	-0.72064	4.37209e-10
Wdr90	840.883	1103.56	1035.52	446.334	478.309	634.554	-0.934384	4.54314e-10
Emc1	1297.66	1393.04	1422.8	683.359	752.633	961.82	-0.778467	4.65315e-10
Mrps21	852.302	825.942	810.044	475.006	531.566	574.618	-0.654138	4.69361e-10
Dnajc9	1168.93	1283.37	1060.57	729.235	662.196	799.138	-0.681239	5.32167e-10
Zc3h3	495.186	625.384	528.199	275.255	301.455	335.828	-0.853816	5.33765e-10
Gm33259	53.9826	69.1578	40.711	3.82299	6.0291	12.3676	-2.88011	5.4013e-10
Tfap4	273.027	306.27	295.416	125.203	116.563	168.39	-1.09164	5.64064e-10
Dhx37	1385.9	1313.01	1301.71	907.96	868.19	686.878	-0.699984	5.66036e-10
Pdha1	6581.72	6330.9	6237.13	3719.77	3896.81	4772	-0.628259	5.8341e-10
Snrpg	2583.9	1987.79	2122.19	1495.74	1319.37	1194.9	-0.739119	5.91824e-10
Smarcd3	265.76	292.439	262.012	139.539	138.669	148.411	-0.943217	6.01208e-10
Rpl18a	21490.3	18239.9	19402.4	7615.4	7715.24	12774.8	-1.07308	6.04059e-10
Gpc1	8190.82	7151.91	6966.8	3668.16	3426.54	5133.51	-0.867365	6.11177e-10
Cpsf4	2097.02	2114.25	1956.22	1473.76	1350.52	1141.63	-0.637162	6.16714e-10
Iba57	169.215	168.943	172.239	66.9023	55.2667	84.6706	-1.30099	6.39726e-10
Matn2	374.764	374.44	338.214	118.513	127.616	208.347	-1.25779	6.92802e-10
Rpl21	402.793	345.789	414.417	97.4862	122.592	208.347	-1.43981	7.10176e-10
Surf2	1012.17	892.136	944.704	605.944	589.847	664.997	-0.614043	7.24135e-10
Enkd1	510.758	558.202	520.892	191.149	194.941	323.461	-1.16324	7.32475e-10
Psmc3ip	249.15	232.173	258.88	74.5483	76.3686	132.238	-1.38471	7.33428e-10
Cdk11b	2077.29	1854.42	1937.43	1345.69	1214.86	962.771	-0.736244	7.35649e-10
Kdelc2	1035.01	1099.61	1027.17	383.255	451.178	680.219	-1.06151	7.42723e-10
Macf1	7553.41	7680.47	7549.28	4538.84	4895.63	5731.91	-0.587065	7.52084e-10
Ndufb2	627.028	472.249	437.382	270.477	270.305	249.255	-0.959785	7.69607e-10
Tsen2	392.412	359.621	331.951	190.194	186.902	214.055	-0.874316	8.13298e-10
Bod1	933.276	852.617	805.869	571.537	570.755	559.397	-0.606986	8.55983e-10
Slc25a5	10554.6	10299.6	9611.97	2633.08	2609.6	4412.38	-1.65782	8.66126e-10
Rtel1	2272.46	2506.48	2334.1	1084.77	1180.7	1662.02	-0.856746	8.67233e-10
Gon4l	1133.63	1176.67	1214.02	768.421	838.045	669.754	-0.631157	8.89448e-10
Samd11	256.417	243.04	195.204	98.442	117.567	100.844	-1.13378	8.91042e-10
Klhdc8a	514.911	545.359	593.963	297.237	351.697	334.877	-0.750068	9.33082e-10
Schip1	474.424	463.357	498.971	293.414	291.406	296.823	-0.70426	9.77379e-10
Rps23	17791.4	14427.3	14713.4	9714.22	9243.61	10843.5	-0.65516	9.92769e-10
Sbk1	174.405	190.678	216.081	84.1058	92.4462	87.5247	-1.13831	1.01856e-09
Rnf39	343.62	353.693	354.916	183.503	208.004	143.655	-0.976657	1.0512e-09
Mrpl21	869.95	705.41	754.719	506.546	434.095	469.969	-0.723411	1.06037e-09
Stk40	4033.12	3267.21	3644.16	2591.03	2408.63	2307.99	-0.582611	1.10062e-09
Exosc3	1200.07	1088.74	1058.49	781.801	756.652	696.392	-0.582862	1.17488e-09
Trim72	95.5076	141.28	99.1678	28.6724	36.1746	39.9569	-1.6821	1.27048e-09
BC017158	697.621	675.771	691.043	400.458	409.979	481.386	-0.67592	1.28251e-09
Sspo	355.039	236.125	344.478	154.831	115.558	88.476	-1.3819	1.28392e-09
Dapk3	681.011	799.267	682.692	382.299	439.119	470.921	-0.743451	1.30338e-09
Mrpl54	669.592	493.984	555.34	246.583	234.13	347.245	-1.05294	1.36134e-09
Mis18a	379.954	478.177	448.865	233.202	217.048	262.574	-0.874409	1.37964e-09
Rpl39l	2932.71	2418.55	2391.51	1776.73	1668.05	1712.44	-0.586119	1.4488e-09
Tmem158	157.795	159.063	196.248	64.0351	52.2522	82.7679	-1.36368	1.46051e-09
Cluap1	362.306	283.547	317.337	111.822	119.577	181.709	-1.22011	1.48706e-09
Magohb	881.369	790.375	643.025	470.228	407.969	443.331	-0.808472	1.49109e-09
Prrx2	1448.19	1670.66	1556.41	760.775	681.288	1071.23	-0.895169	1.52195e-09
Gm10039	1445.07	1302.14	1187.93	832.456	777.754	561.299	-0.85793	1.54545e-09
Slc25a45	232.54	255.884	236.959	86.973	73.354	132.238	-1.30834	1.54798e-09
Hic1	831.539	757.772	791.255	556.245	476.299	444.283	-0.688537	1.56243e-09
Mxd3	257.455	345.789	312.118	60.2121	92.4462	149.363	-1.59937	1.70874e-09
Rpl36a	8257.26	6713.25	7360.34	4533.11	4333.92	5350.42	-0.651281	1.72352e-09
Sgf29	320.781	305.282	303.767	102.265	132.64	177.903	-1.17109	1.74083e-09
6030458C11Rik	1596.64	1584.7	1621.13	806.651	859.147	1156.85	-0.766488	1.80037e-09
Gna12	2799.83	2620.09	2845.59	1948.77	1952.42	1579.25	-0.592893	1.8089e-09
Dennd2d	785.862	713.313	769.333	322.087	350.693	503.267	-0.947265	1.82851e-09
Dyrk2	2116.74	2173.53	2155.59	1255.85	1417.84	1606.84	-0.590561	1.87102e-09
2410015M20Rik	1013.21	846.689	825.702	534.263	440.124	581.278	-0.787035	1.9163e-09
Snrpf	1800.11	1625.21	1463.51	985.376	901.35	1147.33	-0.687961	1.98537e-09
Snhg4	274.065	328.006	287.065	120.424	138.669	171.244	-1.04703	2.04617e-09
Mrpl51	1026.71	1039.34	922.782	667.112	619.992	700.197	-0.588615	2.07502e-09
BC003965	689.316	626.372	664.946	422.44	448.163	410.034	-0.629203	2.08271e-09
Eif2b4	335.315	293.427	289.152	173.946	164.795	138.898	-0.942597	2.10442e-09
Atp5e	1710.83	1585.69	1468.73	1090.51	869.195	1070.27	-0.65287	2.14501e-09
Eapp	539.826	505.84	460.347	291.503	257.242	320.607	-0.792048	2.15996e-09
Asf1b	1694.22	1831.69	1787.11	1103.89	996.811	1308.11	-0.639983	2.22048e-09
Atox1	768.214	720.229	754.719	480.741	371.794	488.045	-0.741754	2.24004e-09
Abhd11	609.38	704.422	688.955	279.078	341.649	431.915	-0.927908	2.24425e-09
Thoc3	1101.45	1029.46	1108.59	785.624	691.337	642.165	-0.612098	2.26612e-09
Emc6	1091.07	964.258	983.327	616.457	637.075	723.981	-0.619414	2.27476e-09
Psmc3	2770.76	2710.99	2543.92	1653.44	1620.82	2024.48	-0.598818	2.3593e-09
Ndufc2	1120.14	1002.79	978.108	634.616	598.891	735.397	-0.654896	2.43152e-09
Rps27a	13544.4	11646.2	12250.9	8524.31	5552.8	7057.15	-0.824993	2.49282e-09
Gm26596	483.767	421.863	444.689	282.901	183.888	214.055	-0.986808	2.51343e-09
Actr8	678.935	718.253	721.315	271.432	307.484	460.456	-1.02692	2.54854e-09
Ino80b	226.312	239.088	245.31	129.982	121.587	110.357	-0.973742	2.57562e-09
Ctu1	393.45	413.959	419.636	251.362	211.018	249.255	-0.785173	2.68344e-09
Cntnap1	185.825	174.87	230.696	54.4776	76.3686	96.0869	-1.38127	2.69771e-09
Depdc1b	375.802	443.598	330.907	201.663	187.907	217.86	-0.921401	2.7546e-09
Trim39	726.689	723.193	799.606	482.652	446.153	518.488	-0.635597	2.82304e-09
Retsat	1208.38	1216.19	1241.16	705.342	685.308	899.03	-0.678563	2.85521e-09
Gusb	555.398	635.264	529.243	233.202	289.397	361.515	-0.960139	2.925e-09
Faap100	330.124	341.837	342.39	210.264	165.8	180.757	-0.864513	2.94691e-09
Tut1	557.474	606.613	588.744	381.343	372.799	377.688	-0.631141	3.0176e-09
Mcrs1	1401.47	1364.38	1271.44	850.615	810.914	996.069	-0.602981	3.07351e-09
Mdp1	813.891	818.038	769.333	348.848	362.751	542.272	-0.936967	3.14583e-09
Grk6	3100.88	3248.44	3029.32	1857.02	1905.2	2375.53	-0.61159	3.27907e-09
P3h3	1859.28	1992.73	1892.54	804.739	899.341	1335.7	-0.918072	3.29348e-09
Mavs	1669.31	2012.49	1754.75	1082.86	1110.36	1310.02	-0.634045	3.42828e-09
Zfp524	201.397	191.666	220.257	86.0173	58.2813	104.649	-1.29815	3.51604e-09
Ppie	665.439	590.805	624.235	335.467	338.634	430.012	-0.767544	3.5904e-09
Pnn	2499.81	2370.14	2622.21	1522.51	1385.69	1857.04	-0.652531	3.67471e-09
Slco4a1	247.074	327.018	290.196	113.734	149.723	150.314	-1.06372	3.67877e-09
Imp4	1979.71	1633.11	1801.72	1261.59	1127.44	940.89	-0.701287	4.13583e-09
Gm12751	2427.14	2129.07	2296.52	1103.89	1439.95	1581.15	-0.732274	4.29872e-09
Fbxo5	1002.83	1228.05	1069.97	535.219	535.585	758.23	-0.851572	4.52114e-09
Gltscr2	2334.75	2124.13	2128.45	1169.83	1023.94	1572.59	-0.806215	4.554e-09
Gpld1	300.019	322.078	336.127	181.592	188.912	157.925	-0.85932	4.79413e-09
Gcsh	1317.38	1355.49	1307.97	998.756	837.04	802.944	-0.593141	4.87123e-09
Ehbp1l1	2615.04	2466.96	2662.92	1539.71	1529.38	1958.84	-0.623054	4.91081e-09
Tia1	2139.58	2145.87	2150.38	1155.5	1355.54	1588.76	-0.650526	5.07954e-09
Lgals7	1101.45	855.581	897.73	593.519	486.347	604.11	-0.760828	5.27975e-09
Trmt112	1284.16	1243.85	1210.89	633.661	680.283	903.787	-0.753275	5.42498e-09
Psmb4	5039.07	4288.77	4088.84	2855.77	2784.44	3246.02	-0.594289	5.63214e-09
Cdh26	2855.89	3038.99	2859.16	458.759	571.76	1016.05	-2.09667	5.7634e-09
Wbp11	3934.5	3602.13	3639.98	2730.57	2490.02	2063.49	-0.617687	5.87299e-09
Myo1c	5810.39	5924.85	5544	3373.79	3356.2	4381.94	-0.636866	6.32677e-09
Slc35d1	609.38	659.963	536.55	388.033	371.794	342.488	-0.712697	6.35723e-09
Phpt1	584.465	556.226	505.234	330.689	365.765	321.558	-0.693777	6.46442e-09
Sh2b2	612.495	470.273	590.831	323.043	341.649	306.336	-0.785125	6.68164e-09
Ddx51	1510.47	1254.72	1288.14	903.181	940.54	800.09	-0.616584	7.17647e-09
Uprt	560.588	457.43	541.769	323.998	300.45	314.898	-0.730833	7.40506e-09
Ccnd1	11798.3	12692.4	11732.1	7729.13	7001.79	9094	-0.604391	7.57114e-09
Mccc2	259.532	221.305	233.827	96.5305	97.4704	137.946	-1.10497	7.70041e-09
Ckap2	1771.04	1791.19	1789.2	908.916	910.394	1311.92	-0.772939	7.7843e-09
Ctnnbl1	627.028	656.011	562.647	413.839	383.853	359.612	-0.673715	7.82935e-09
Gm21949	440.166	437.67	469.742	283.857	273.319	282.552	-0.682007	8.05743e-09
Ring1	630.143	655.023	644.069	226.512	305.474	410.985	-1.0326	8.06502e-09
Smim10l1	2055.49	1832.68	1765.19	1171.75	1146.53	1403.25	-0.602972	8.43829e-09
Gm10260	19403.6	15846	15765.6	9141.72	8091.05	11824.4	-0.811997	8.54045e-09
Cdca5	451.585	470.273	437.382	243.716	216.043	300.628	-0.8372	8.62548e-09
D130020L05Rik	385.145	389.26	393.54	248.494	154.747	167.438	-1.03233	8.78244e-09
Esrra	1053.7	981.053	987.503	701.519	590.852	710.662	-0.592821	8.84527e-09
LOC102638183	323.895	327.018	299.591	165.344	186.902	186.466	-0.819704	9.07492e-09
Fbxo46	213.854	241.064	266.187	108.955	129.626	77.0598	-1.1936	9.33769e-09
Pak4	1041.24	1052.19	1069.97	705.342	722.487	537.516	-0.687087	9.7521e-09
Polr2j	995.563	912.883	907.124	650.864	567.74	661.192	-0.582283	9.96385e-09
Polr3d	1230.18	1009.7	1215.07	685.271	769.715	783.916	-0.625645	1.01558e-08
Cdc7	631.181	753.82	680.604	359.361	321.552	467.115	-0.84695	1.02194e-08
Gm31649	113.156	123.496	83.5097	42.0529	25.1212	36.1515	-1.62968	1.03001e-08
Def6	943.657	976.113	1009.42	565.802	561.711	719.224	-0.665121	1.04056e-08
Clstn3	397.602	378.392	377.882	236.07	239.154	224.52	-0.721743	1.05582e-08
Aarsd1	691.392	747.892	684.78	392.812	339.639	490.899	-0.795399	1.07549e-08
Rfx1	946.771	1035.39	964.537	537.13	586.832	714.468	-0.680555	1.09428e-08
Chsy1	1009.06	1072.93	926.958	693.873	700.38	612.673	-0.584778	1.12828e-08
Nt5c	727.727	713.313	617.972	265.698	287.387	450.942	-1.03573	1.13405e-08
Wdr12	2551.72	2070.78	2275.64	1529.2	1505.27	1112.13	-0.734343	1.13706e-08
Mvd	130.804	162.027	156.581	75.504	54.2619	46.6164	-1.34917	1.15161e-08
Adck1	266.799	257.86	272.45	119.468	138.669	158.876	-0.93439	1.16704e-08
Htatsf1	1333.99	1307.08	1228.64	746.439	825.987	959.917	-0.611685	1.17128e-08
Mina	665.439	650.083	647.2	282.901	305.474	447.137	-0.922005	1.2003e-08
B930095G15Rik	1251.98	981.053	1074.14	718.722	726.507	710.662	-0.617076	1.20414e-08
Banp	375.802	416.923	457.216	197.84	151.732	254.963	-1.0467	1.21703e-08
1810009A15Rik	347.772	348.753	338.214	153.875	167.81	221.666	-0.928767	1.24083e-08
Pa2g4	8517.83	7673.55	7793.55	5856.82	5368.91	4428.56	-0.615579	1.26532e-08
Zfp970	151.566	162.027	149.274	79.327	66.3201	61.8381	-1.1576	1.30351e-08
Pusl1	579.275	469.285	492.707	310.618	298.44	322.509	-0.72578	1.34308e-08
Lfng	338.429	288.487	314.205	80.2828	107.519	176.952	-1.36661	1.40596e-08
Ap4s1	228.388	190.678	169.107	95.5747	61.2958	90.3787	-1.24826	1.45223e-08
Tmed1	817.006	680.71	728.622	466.405	442.134	510.878	-0.648718	1.5078e-08
Ankle1	281.332	509.792	434.251	35.3627	38.1843	93.2328	-2.87647	1.52587e-08
Rps16	19832.4	15395.5	14512.9	9024.17	8547.25	11268.8	-0.78632	1.52934e-08
Mrpl27	623.914	543.383	530.287	302.972	267.29	379.591	-0.83683	1.59382e-08
Pex16	277.18	258.848	296.46	140.495	133.645	168.39	-0.910432	1.60908e-08
Gm5088	391.374	366.536	411.285	251.362	223.077	221.666	-0.747536	1.65806e-08
Spg7	1327.76	1229.03	1245.34	749.306	799.861	953.258	-0.603236	1.65819e-08
Rplp2-ps1	1140.9	1251.76	853.887	549.555	637.075	666.9	-0.808967	1.78176e-08
Ppp2r5a	2236.12	2370.14	2271.46	1406.86	1396.74	1774.28	-0.587107	1.83035e-08
Pgd	2244.43	2802.87	2333.05	1523.46	1470.1	1786.64	-0.626634	1.88959e-08
Calm3	4794.07	4962.57	4558.59	2894	2783.43	3674.13	-0.614189	1.96425e-08
Naa38	536.711	420.875	385.189	237.025	216.043	266.379	-0.89957	1.97071e-08
Slc25a10	412.136	556.226	482.269	265.698	253.222	299.677	-0.825535	1.99275e-08
Spc24	518.025	617.48	548.033	159.61	154.747	336.78	-1.36975	1.99655e-08
Sf3b5	1216.68	1021.56	1075.19	752.173	555.682	711.614	-0.713685	2.02669e-08
Tmem201	1466.87	1558.03	1530.32	928.986	840.055	1143.53	-0.644892	2.04665e-08
Gm6421	59.1732	69.1578	74.1149	14.3362	25.1212	16.173	-1.86836	2.17667e-08
Prmt6	1110.8	905.967	995.853	705.342	645.114	643.116	-0.595257	2.22701e-08
Rnaseh1	396.564	362.585	417.549	249.45	232.12	223.568	-0.738272	2.34041e-08
Adra2b	72.6689	121.52	81.422	25.8052	30.1455	29.492	-1.69179	2.61106e-08
Mbtps1	4018.59	4106.99	3994.9	2234.54	2369.44	3108.08	-0.652181	2.74243e-08
Trmt1l	830.501	748.88	850.755	457.803	508.454	580.327	-0.651588	2.78804e-08
Utp20	4781.61	4423.14	4509.53	3061.26	3202.46	2225.22	-0.692119	2.94533e-08
Gucd1	512.835	565.118	540.725	353.627	364.761	331.072	-0.625745	2.95387e-08
Fbxl15	191.015	207.473	210.862	115.645	98.4753	84.6706	-1.02825	2.96109e-08
Ogfod1	1140.9	1310.05	1258.91	792.315	887.283	650.727	-0.671382	3.00621e-08
Taf1d	3544.16	3178.3	3337.26	1765.27	2002.67	2525.85	-0.67649	3.0354e-08
Rpl3-ps1	11295.9	9970.58	10559.8	5665.67	5824.11	7963.79	-0.710133	3.08146e-08
Syt4	146.376	159.063	169.107	74.5483	52.2522	78.9625	-1.20329	3.11336e-08
Gm9385	117.308	117.568	123.177	47.7874	55.2667	49.4705	-1.23201	3.22252e-08
Pus7l	350.887	270.703	336.127	134.76	177.858	178.855	-0.962378	3.23483e-08
Stbd1	1133.63	953.39	1087.71	564.847	657.172	754.424	-0.683465	3.26569e-08
Wdr13	938.466	1055.15	1050.13	461.626	527.546	722.078	-0.830607	3.31579e-08
Brat1	578.237	620.444	626.323	362.228	354.712	434.769	-0.663691	3.3555e-08
Slirp	522.178	443.598	462.435	282.901	298.44	306.336	-0.685824	3.35648e-08
Coa4	165.062	135.352	173.283	65.9466	42.2037	77.0598	-1.35151	3.51678e-08
Katnb1	424.594	443.598	468.698	293.414	282.363	258.769	-0.679919	3.57286e-08
Mrps27	648.829	657.987	631.542	381.343	438.115	452.845	-0.60765	3.642e-08
Myo18a	1617.4	1806.01	1705.69	1102.93	976.714	1290.99	-0.605435	3.6585e-08
Top1mt	688.278	658.975	649.288	347.892	353.707	478.532	-0.758029	3.86617e-08
Osr1	1659.96	1732.9	1607.56	933.765	890.297	1260.55	-0.696718	3.91747e-08
Eme1	156.757	214.389	199.379	71.6811	89.4316	97.0382	-1.14484	4.04269e-08
Pycrl	839.844	800.255	684.78	298.193	318.537	520.391	-1.03137	4.05583e-08
Ndufa1	802.472	613.529	617.972	419.573	419.022	391.958	-0.724855	4.10672e-08
Atxn7l2	327.01	314.174	296.46	141.451	148.718	201.687	-0.930111	4.32408e-08
Mettl8	441.204	492.008	450.953	226.512	211.018	312.996	-0.882381	4.36283e-08
Dancr	160.91	156.099	163.888	69.7696	68.3298	87.5247	-1.0906	4.41324e-08
Lss	716.307	778.519	700.438	523.75	473.284	420.499	-0.631316	4.43751e-08
Tmem186	394.488	445.574	418.592	207.397	247.193	275.893	-0.785233	4.59177e-08
Exosc2	1216.68	1076.89	1053.27	632.705	649.133	825.776	-0.666848	4.5975e-08
9130023H24Rik	160.91	173.883	192.072	77.4155	56.2716	94.1841	-1.20688	4.61844e-08
Cenpl	417.327	446.562	448.865	299.149	256.237	249.255	-0.706001	4.69215e-08
Katnal1	909.399	949.438	993.766	444.423	415.003	677.365	-0.891838	4.87676e-08
Acad8	473.386	483.117	495.839	293.414	278.343	337.731	-0.674613	4.90622e-08
Hhat	250.189	251.932	256.792	135.716	123.597	155.071	-0.871947	5.19326e-08
1110038B12Rik	3179.78	2545.01	2749.56	1978.4	1750.45	1340.46	-0.741309	5.2576e-08
Tmem261	448.471	399.139	362.223	232.247	221.067	257.817	-0.766133	5.4993e-08
Bend3	461.966	445.574	445.733	298.193	269.3	296.823	-0.646247	5.53989e-08
Fam50a	1101.45	885.22	1065.79	707.253	663.201	584.132	-0.64288	5.54367e-08
0610012G03Rik	419.403	408.031	411.285	275.255	258.246	245.45	-0.669177	5.5531e-08
Lsm11	258.494	304.294	298.547	177.769	149.723	143.655	-0.870378	5.55678e-08
Copz1	2794.64	2546.98	2607.59	1936.34	1881.08	1483.16	-0.584744	5.73854e-08
Timm8a1	1151.28	1087.75	1084.58	634.616	675.259	840.046	-0.628192	6.21818e-08
Stard4	555.398	765.676	685.824	402.37	426.056	353.904	-0.764065	6.31855e-08
Zbtb22	919.78	881.268	982.283	471.183	486.347	680.219	-0.76461	6.691e-08
Gm2000	1259.25	931.655	1011.51	688.138	682.293	665.948	-0.652909	6.72062e-08
Dctpp1	373.726	274.655	266.187	123.291	126.611	178.855	-1.09197	6.85213e-08
Lpar6	411.098	452.49	476.005	189.238	126.611	272.088	-1.18678	6.89824e-08
5830417I10Rik	147.414	158.075	163.888	75.504	82.3977	60.8867	-1.10263	7.02139e-08
Trappc3	791.052	824.954	746.368	410.016	384.858	569.862	-0.791152	7.02171e-08
Thtpa	407.984	491.02	424.856	172.99	139.674	277.796	-1.16392	7.05736e-08
Sod1	3407.13	3123.96	2862.3	1453.69	1520.34	2310.84	-0.829652	7.08562e-08
Mrps24	668.554	557.214	552.208	370.83	355.717	397.666	-0.660807	8.04706e-08
Tmem119	241.883	389.26	315.249	111.822	116.563	178.855	-1.21632	8.17139e-08
Rcbtb2	779.633	657.987	716.096	305.839	270.305	488.996	-1.01499	8.58984e-08
Snhg7	263.684	241.064	243.222	96.5305	109.529	155.071	-1.04959	8.90501e-08
Nsmf	1260.29	1236.94	1253.69	686.227	643.104	944.695	-0.721573	9.19473e-08
Abhd14a	198.282	211.425	184.765	53.5219	106.514	88.476	-1.26037	9.21895e-08
Slc5a3	721.498	832.858	755.763	315.397	315.523	534.661	-0.986493	9.29769e-08
Mrpl50	758.871	654.035	687.911	366.051	352.702	502.315	-0.782098	9.47565e-08
B130055M24Rik	290.675	393.212	353.872	195.928	195.946	193.125	-0.827578	9.58586e-08
Atp5g2	4837.67	4160.34	4662.97	2166.68	2181.53	3397.29	-0.818505	9.87012e-08
Lypla2	999.716	987.969	985.415	685.271	692.342	512.78	-0.653665	9.91996e-08
Slit3	3094.66	2596.38	3019.92	1651.53	1923.28	1039.83	-0.916767	1.04898e-07
Ppp1r11	2407.42	1854.42	1981.27	1462.29	1294.25	1414.66	-0.58152	1.06239e-07
Dimt1	1030.86	816.062	830.922	604.988	579.798	555.591	-0.621465	1.10673e-07
Pard6a	314.552	268.728	312.118	97.4862	138.669	179.806	-1.10565	1.16413e-07
Pdlim1	2320.21	1998.66	2063.73	1146.9	1223.91	1619.21	-0.67755	1.16597e-07
Whsc1	6509.05	6573.94	6393.71	3271.52	3410.46	4978.44	-0.74007	1.16922e-07
Ighmbp2	361.268	312.198	318.381	213.132	176.854	186.466	-0.782101	1.17302e-07
Qrsl1	309.362	235.137	247.398	155.787	131.635	118.919	-0.962079	1.20212e-07
Timm23	2128.16	1415.76	1372.69	886.934	836.035	1031.27	-0.835771	1.20268e-07
Gas8	757.832	812.11	842.404	466.405	463.236	599.354	-0.657435	1.21465e-07
Rpl23a-ps3	912.513	578.95	671.209	405.237	369.785	421.45	-0.853443	1.25006e-07
Insig1	502.453	610.565	539.682	346.936	337.63	234.985	-0.846585	1.30726e-07
Dhdds	883.446	866.449	924.87	612.634	591.857	428.11	-0.712515	1.33483e-07
Doc2g	150.528	142.268	155.537	60.2121	47.2279	82.7679	-1.23436	1.36405e-07
Lage3	428.746	398.151	418.592	110.867	124.601	256.866	-1.33808	1.37774e-07
Wdr89	1229.14	1335.73	931.133	622.192	711.434	767.743	-0.73465	1.4193e-07
Mmab	521.14	554.25	622.147	233.202	274.324	387.201	-0.92349	1.42164e-07
Ubxn2b	266.799	246.992	290.196	138.583	123.597	168.39	-0.899399	1.42805e-07
Hmx2	87.2026	109.665	105.431	41.0971	36.1746	43.7623	-1.31985	1.45697e-07
Zfp236	1575.88	1616.32	1649.32	964.349	991.787	1267.2	-0.586675	1.47328e-07
Gcn1l1	7387.31	6799.2	7105.63	5246.1	5011.19	3889.14	-0.589911	1.50058e-07
Suox	1762.74	1681.52	1734.91	899.358	991.787	1327.14	-0.686229	1.52548e-07
Eef2	89051.5	83486.3	83465.9	42690.4	42565.4	61092.2	-0.806757	1.54806e-07
Elmsan1	4586.44	4423.14	4484.47	2496.41	2389.53	3503.84	-0.685496	1.56059e-07
Rwdd2b	139.109	157.087	175.37	55.4333	45.2182	86.5733	-1.33035	1.56203e-07
Irf3	947.81	930.667	962.45	559.112	565.731	725.884	-0.617852	1.59418e-07
Entpd6	514.911	584.878	500.014	310.618	303.465	375.785	-0.692472	1.62304e-07
Rexo4	1537.47	1418.72	1441.59	999.712	863.166	566.056	-0.856563	1.63028e-07
Nelfa	934.314	896.088	900.861	626.97	655.162	493.753	-0.621455	1.64692e-07
Fes	593.808	721.217	596.051	422.44	346.673	418.596	-0.686045	1.65161e-07
Dennd6b	425.632	411.983	453.04	288.636	261.261	276.844	-0.64194	1.6558e-07
Ext1	2569.36	2333.58	2330.97	1373.41	1314.34	1868.46	-0.666712	1.67625e-07
Gm33350	162.986	155.111	143.01	76.4598	81.3928	59.9354	-1.08357	1.68967e-07
Cog8	931.2	893.124	815.264	604.032	577.789	423.353	-0.717942	1.78137e-07
Cdc42bpg	575.122	631.312	609.621	385.166	353.707	439.526	-0.623532	1.81e-07
Tnfrsf12a	14094.6	10595	10929.3	6406.37	6064.27	8565.05	-0.759759	1.83409e-07
Gm42270	43.6013	62.242	26.0968	3.82299	9.04365	8.56219	-2.62765	1.86328e-07
Pdcd2	1511.51	1171.73	1292.31	706.297	765.696	966.577	-0.7048	1.86538e-07
Tyw3	343.62	289.475	297.503	144.318	168.815	198.833	-0.861682	2.0994e-07
Irx5	755.756	685.65	756.807	487.431	403.95	526.099	-0.632086	2.15426e-07
Cul7	1168.93	1384.14	1326.76	962.438	749.618	863.83	-0.590696	2.1579e-07
Evc2	694.507	677.747	650.332	373.697	369.785	501.364	-0.699727	2.27442e-07
Rpl13a	29116.3	22382.4	20886.8	10606.9	11349.8	16822.8	-0.900394	2.29391e-07
Pank2	1015.29	1076.89	1025.08	545.732	615.973	787.722	-0.677095	2.36967e-07
Gm5529	101.736	93.857	76.2026	19.1149	23.1115	42.811	-1.67439	2.37025e-07
Pinx1	743.299	565.118	639.893	431.042	406.964	335.828	-0.730866	2.40526e-07
Fbxw5	1271.71	1169.76	1288.14	763.642	737.56	963.723	-0.597002	2.43122e-07
Wdr92	586.542	542.395	533.418	397.591	348.683	310.142	-0.65399	2.4812e-07
Romo1	579.275	459.405	420.68	305.839	286.382	247.352	-0.797645	2.51709e-07
Oxnad1	1120.14	1213.23	1076.23	546.688	594.871	850.511	-0.775153	2.54847e-07
Mrps23	818.044	703.434	688.955	427.219	422.037	538.467	-0.671091	2.5963e-07
Scand1	659.21	598.709	572.042	220.778	217.048	414.791	-1.10115	2.61264e-07
Plpp6	133.918	124.484	138.835	58.3006	63.3055	66.5948	-1.07733	2.76323e-07
Mzt2	314.552	281.571	270.363	150.052	126.611	186.466	-0.902411	2.76877e-07
Wwox	485.843	438.658	490.62	256.14	272.314	334.877	-0.712263	2.81716e-07
Sorbs3	759.909	859.533	755.763	299.149	334.615	557.494	-0.995255	2.84236e-07
Arhgap33	612.495	516.708	639.893	349.804	329.591	413.839	-0.693468	2.85243e-07
Dynlt1b	261.608	254.896	231.739	159.61	120.582	126.53	-0.878815	2.87314e-07
Smad5	1881.09	1938.39	1852.87	1082.86	1172.66	1492.68	-0.597636	2.91265e-07
Gpr85	215.93	214.389	219.213	86.0173	111.538	132.238	-0.977756	3.03131e-07
Gm12918	191.015	189.69	216.081	49.6989	65.3152	115.114	-1.37357	3.03322e-07
Zbtb40	545.016	596.733	574.129	365.095	302.46	186.466	-1.00694	3.07071e-07
Dnajb5	218.007	193.642	204.599	99.3977	110.533	121.773	-0.893191	3.20522e-07
Mtx1	902.132	720.229	758.895	507.502	552.667	416.693	-0.689462	3.36698e-07
2310022A10Rik	887.598	800.255	778.728	594.475	570.755	483.288	-0.581497	3.38789e-07
Psma7	4309.26	3822.45	3720.36	2042.43	2115.21	3051.95	-0.717041	3.38949e-07
Phtf1	780.671	880.28	827.79	449.201	529.556	613.624	-0.644328	3.45599e-07
Lgals1	54122.7	40166.9	39934.4	20908.9	19425.8	30799.2	-0.916023	3.48825e-07
Zfp251	441.204	493.984	493.751	274.299	327.581	312.996	-0.643907	3.56206e-07
Gm9816	438.089	477.189	536.55	318.264	293.416	315.85	-0.645955	3.61939e-07
Cenpa	1701.49	1853.43	1782.93	830.544	864.171	1355.68	-0.807066	3.66627e-07
Aurkb	2203.94	2530.19	2246.41	616.457	570.755	1114.04	-1.60081	3.71285e-07
Bola2	669.592	659.963	562.647	278.122	288.392	448.088	-0.898723	3.73147e-07
Wrb	285.485	373.452	336.127	170.123	215.038	170.293	-0.842627	3.91391e-07
Acat2	311.438	605.625	362.223	158.654	180.873	222.617	-1.18682	3.91524e-07
Znhit1	943.657	843.725	879.984	576.316	514.483	672.608	-0.596373	4.09192e-07
Ccdc61	464.043	526.587	563.691	336.423	342.654	337.731	-0.612338	4.21554e-07
Ccdc169	90.317	93.857	93.9484	36.3184	45.2182	27.5893	-1.35267	4.24838e-07
Poldip2	1716.02	1602.49	1564.76	825.766	797.851	1250.08	-0.764643	4.27749e-07
Nnmt	722.536	524.611	628.411	354.582	339.639	425.256	-0.74368	4.27826e-07
Grin2d	251.227	310.222	306.898	175.858	129.626	167.438	-0.875748	4.32171e-07
Akt2-ps	234.617	223.281	205.643	129.982	96.4656	126.53	-0.909218	4.43325e-07
Ppp2r3d	93.4314	78.0495	64.72	28.6724	32.1552	22.8325	-1.49938	4.74206e-07
Myeov2	778.595	505.84	507.322	286.724	251.212	371.028	-0.978339	4.77683e-07
Fxn	360.23	345.789	299.591	124.247	126.611	220.714	-1.09164	4.83128e-07
Glo1	3165.25	2921.42	2944.76	1486.19	1638.91	2344.14	-0.723492	4.8454e-07
Mrps16	1058.89	823.966	769.333	480.741	446.153	619.332	-0.77795	4.91939e-07
Gm10132	96.5458	91.8811	81.422	41.0971	31.1503	36.1515	-1.31444	4.99187e-07
Mrpl36	561.626	501.888	543.857	325.91	300.45	390.056	-0.660286	5.0053e-07
Dera	405.907	457.43	405.022	199.751	233.125	294.92	-0.801342	5.29879e-07
1810043G02Rik	228.388	288.487	278.714	86.0173	78.3783	163.633	-1.27694	5.40184e-07
Pcgf1	279.256	264.776	226.52	119.468	127.616	164.584	-0.903996	5.54565e-07
Dhrs7b	800.396	736.037	644.069	517.059	480.318	452.845	-0.58847	5.74401e-07
Meaf6	338.429	388.272	346.565	190.194	171.829	246.401	-0.818203	5.80447e-07
D10Jhu81e	230.464	210.437	207.73	101.309	82.3977	136.044	-1.01864	5.88254e-07
Pop5	450.547	415.935	397.715	292.459	266.285	248.304	-0.647441	6.16627e-07
Psmg4	493.11	457.43	431.119	293.414	307.484	312.044	-0.597864	6.58714e-07
Acpt	120.423	100.773	125.265	47.7874	24.1164	55.1786	-1.44267	7.04424e-07
Zfp428	516.987	441.622	421.724	254.229	233.125	322.509	-0.768423	7.0592e-07
Glrx5	1164.78	1040.33	924.87	755.04	687.317	569.862	-0.637496	7.10555e-07
Lsm5	307.285	372.464	403.978	201.663	237.145	184.563	-0.79878	7.2487e-07
Anxa11	552.283	558.202	658.683	403.325	381.843	397.666	-0.580349	7.6125e-07
Mars2	418.365	462.369	445.733	252.317	257.242	319.655	-0.67746	7.71456e-07
Acox2	52.9445	30.627	46.9742	11.469	11.0533	7.61084	-2.11505	8.16141e-07
Aurkaip1	1315.31	1080.84	1042.83	679.536	703.395	856.219	-0.618745	8.64279e-07
Mrpl48-ps	169.215	109.665	114.826	44.9201	42.2037	67.5462	-1.34575	8.86028e-07
Ddx28	638.448	563.142	595.007	426.263	305.474	388.153	-0.680914	8.92819e-07
Lsm7	438.089	369.5	354.916	206.441	199.965	267.331	-0.786162	9.0414e-07
Spns1	708.002	670.831	689.999	501.767	433.09	333.926	-0.705461	9.06818e-07
Cwc27	386.183	358.633	406.066	234.158	232.12	265.428	-0.652623	9.17752e-07
Rpl39	10651.2	7262.56	7884.36	5902.7	5333.74	4349.59	-0.726997	9.37368e-07
1810010H24Rik	95.5076	62.242	77.2465	23.8937	19.0921	35.2001	-1.58358	9.54096e-07
Ak1	1331.92	1314	1329.89	722.545	750.623	1048.39	-0.656642	9.61651e-07
Zfp317	632.219	628.348	679.56	359.361	356.722	489.948	-0.685258	9.62354e-07
Sh3rf3	118.346	126.46	160.756	65.9466	54.2619	67.5462	-1.10934	1.06829e-06
Ncln	3530.67	3209.91	3635.8	2422.82	2377.48	1554.51	-0.707454	1.10885e-06
Ifitm1	534.635	485.093	471.83	305.839	350.693	336.78	-0.586785	1.1927e-06
Crocc2	127.69	120.532	146.142	26.7609	43.2085	71.3516	-1.47938	1.22538e-06
Gclm	1292.47	1562.97	1329.89	654.687	682.293	1062.66	-0.802371	1.25552e-06
Patz1	430.823	581.914	507.322	290.547	323.562	331.072	-0.686085	1.25698e-06
Snrnp35	207.625	159.063	174.327	60.2121	53.257	108.454	-1.2834	1.27783e-06
Poc1a	187.901	181.786	213.994	62.1236	56.2716	119.871	-1.29058	1.28639e-06
Dna2	197.244	293.427	253.661	102.265	125.606	146.509	-0.992004	1.31749e-06
Fbln5	1423.27	1336.72	1370.6	911.783	846.084	475.677	-0.887212	1.3246e-06
Ammecr1	542.94	458.418	465.567	339.29	320.547	302.531	-0.607902	1.32912e-06
Crebzf	1289.35	1544.2	1369.56	604.032	670.235	1061.71	-0.847279	1.34736e-06
Adat1	292.752	293.427	311.074	202.618	175.849	175.049	-0.696415	1.39219e-06
Xndc1	368.535	455.454	399.803	268.565	259.251	254.963	-0.645222	1.47451e-06
Ptrh2	997.64	800.255	755.763	471.183	519.507	614.575	-0.669524	1.54234e-06
Adck5	497.263	503.864	504.19	320.175	299.445	374.834	-0.597444	1.57959e-06
Mmp23	22.8388	27.6631	42.7987	7.64598	4.0194	1.90271	-2.77999	1.61555e-06
Tmem109	1006.98	1128.26	1018.82	624.103	519.507	804.846	-0.694475	1.6285e-06
Tmem104	317.667	258.848	298.547	194.017	162.786	146.509	-0.797304	1.63802e-06
Trp53rkb	209.702	150.171	155.537	92.7075	80.388	83.7192	-1.00396	1.64186e-06
Mrpl32	669.592	564.13	602.314	330.689	331.6	457.602	-0.712533	1.643e-06
Fam219b	630.143	726.157	614.84	371.786	421.032	485.191	-0.625374	1.6437e-06
Bad	559.55	547.335	479.137	269.521	282.363	390.056	-0.751328	1.66328e-06
Bloc1s2	1502.17	1369.32	1220.29	794.226	835.03	1060.76	-0.604946	1.72884e-06
Ubxn8	501.415	473.237	459.303	222.689	227.096	351.05	-0.839728	1.7339e-06
Gm3571	77.8595	145.231	101.256	47.7874	29.1406	40.9083	-1.45998	1.77578e-06
Fancf	325.972	282.559	249.485	97.4862	132.64	183.612	-1.05198	1.84112e-06
Gm7730	574.084	491.02	448.865	337.379	309.494	333.926	-0.625942	1.88516e-06
Dtwd2	183.748	164.991	176.414	99.3977	82.3977	101.795	-0.887346	1.93321e-06
Nrp1	478.576	547.335	497.927	313.485	294.421	375.785	-0.631116	2.0351e-06
Rps15	13736.5	11752.9	11974.3	7872.49	6957.58	9836.06	-0.602907	2.04364e-06
Neurl1b	391.374	496.948	455.128	280.034	271.309	306.336	-0.647547	2.0452e-06
Dyrk1b	177.52	234.149	254.705	129.982	117.567	101.795	-0.93198	2.18342e-06
Mybl2	1131.56	1517.52	1262.04	647.041	564.726	971.333	-0.840983	2.19547e-06
Ddx11	576.16	704.422	622.147	467.36	382.848	330.12	-0.689124	2.22734e-06
Adgra2	12009	10784.7	11288.4	8397.2	8136.27	5893.64	-0.603792	2.23837e-06
Stmn1	2310.87	2534.14	2433.26	510.369	509.459	1099.77	-1.7797	2.38254e-06
Rpl4	43880.6	40114.5	41792.4	19078.6	20448.7	32035.9	-0.813688	2.50104e-06
Sdhaf1	256.417	260.824	242.178	134.76	122.592	173.147	-0.81789	2.50888e-06
Bcs1l	314.552	317.138	271.407	191.149	190.921	180.757	-0.682713	2.5519e-06
Flad1	318.705	320.102	297.503	140.495	167.81	218.812	-0.828596	2.68546e-06
Grk5	367.497	476.201	418.592	245.627	220.062	293.969	-0.732335	2.91195e-06
Msto1	582.389	772.592	684.78	306.795	359.736	494.705	-0.812703	2.96156e-06
Nudt1	395.526	383.332	331.951	155.787	173.839	262.574	-0.906944	2.99783e-06
Gm33272	196.206	137.328	231.739	73.5925	71.3443	107.503	-1.16105	3.01416e-06
Rpl13-ps6	53.9826	54.3383	35.4916	6.69023	10.0485	19.0271	-2.00579	3.09701e-06
Rundc3a	210.74	197.594	218.169	106.088	137.664	87.5247	-0.920903	3.10077e-06
Caskin2	586.542	567.094	627.367	438.688	381.843	303.482	-0.664035	3.13648e-06
Mrrf	684.125	664.903	694.175	315.397	335.62	521.343	-0.8009	3.15232e-06
Rps16-ps2	2457.25	1988.78	1842.43	1066.61	1222.9	1599.23	-0.693287	3.17739e-06
Adamts10	367.497	391.236	418.592	261.875	247.193	170.293	-0.793775	3.17871e-06
Cdk20	317.667	368.512	325.688	166.3	205.994	231.179	-0.746114	3.20541e-06
Dgcr14	401.755	371.476	368.487	263.786	256.237	219.763	-0.626264	3.22282e-06
Tor4a	908.361	1079.85	981.239	515.148	526.541	771.549	-0.711413	3.2526e-06
Smim12	369.573	319.114	306.898	184.459	159.771	231.179	-0.789801	3.27153e-06
Rps13-ps2	96.5458	103.737	93.9484	47.7874	37.1794	48.5191	-1.13882	3.27219e-06
Ccdc163	158.833	144.243	184.765	59.2563	76.3686	97.9896	-1.06141	3.31411e-06
Gm6274	105.889	117.568	78.2904	46.8316	26.1261	44.7137	-1.35643	3.32817e-06
Ppif	827.387	841.749	916.519	605.944	640.089	466.164	-0.595078	3.42847e-06
Mrpl23	800.396	605.625	721.315	383.255	347.678	524.197	-0.7604	3.46886e-06
Mrpl47	254.341	259.836	250.529	136.672	165.8	161.73	-0.720826	3.58045e-06
Pex10	129.766	119.544	88.7291	59.2563	38.1843	47.5677	-1.21964	3.59036e-06
Fzd2	325.972	412.971	360.136	215.043	218.052	251.158	-0.683928	3.73097e-06
Zfp579	506.606	502.876	575.173	372.741	371.794	306.336	-0.592747	3.79143e-06
Kif23	2151	2501.54	2122.19	1231	1337.46	1809.48	-0.629878	3.87492e-06
Snhg3	68.5164	122.508	84.5536	29.6282	21.1018	43.7623	-1.54247	4.04053e-06
P2ry2	444.318	305.282	367.443	197.84	205.994	243.547	-0.786137	4.06882e-06
Snrnp25	193.092	214.389	212.95	93.6632	98.4753	138.898	-0.905495	4.14485e-06
Trib3	7257.54	7779.27	7355.12	2435.24	2712.09	4319.15	-1.24206	4.21757e-06
Ndufs7	1114.95	1119.37	1013.6	524.705	508.454	850.511	-0.785622	4.38306e-06
Rps2-ps13	501.415	358.633	435.294	218.866	278.343	274.942	-0.746206	4.4592e-06
Snhg15	823.234	656.011	664.946	521.838	406.964	468.067	-0.617565	4.65281e-06
Tmem198	104.851	108.677	109.607	61.1678	38.1843	48.5191	-1.12565	4.81915e-06
Hnrnpa1	17682.4	15427.1	16399.2	5410.49	5887.42	9497.38	-1.25141	5.09872e-06
Gm5846	145.338	135.352	134.659	82.1943	60.291	71.3516	-0.956243	5.24987e-06
Gm11993	246.036	175.858	206.687	120.424	105.509	119.871	-0.860727	5.4323e-06
Mrps28	439.128	385.308	378.925	191.149	164.795	291.115	-0.894013	5.44158e-06
Rps2	3236.88	3288.95	3351.87	2563.31	1622.83	2227.12	-0.622915	5.50699e-06
Borcs7	258.494	230.197	274.538	123.291	140.679	173.147	-0.80328	5.57402e-06
Unk	774.442	809.146	814.22	395.679	433.09	629.797	-0.716824	5.70471e-06
Tbl2	1030.86	1152.96	1082.49	815.253	659.182	459.504	-0.756275	5.92642e-06
Mipep	500.377	522.635	470.786	243.716	229.106	376.737	-0.813556	6.00653e-06
Mrm2	126.651	153.135	157.625	70.7253	76.3686	82.7679	-0.928374	6.02744e-06
C130083M11Rik	121.461	106.701	141.967	41.0971	53.257	71.3516	-1.15819	6.19876e-06
Sema3a	10086.4	10030.8	9733.06	4816.01	5091.57	8081.76	-0.730568	6.27025e-06
Nmral1	266.799	307.258	273.494	157.698	164.795	195.979	-0.709074	6.31718e-06
Avil	612.495	423.839	556.384	332.6	344.664	238.79	-0.798049	6.32237e-06
Aldh16a1	539.826	604.637	620.06	213.132	211.018	432.867	-1.04126	6.44029e-06
Hyls1	350.887	397.163	403.978	220.778	249.203	273.99	-0.630961	6.58477e-06
Cox10	633.257	535.479	590.831	411.927	404.955	293.017	-0.665001	6.90663e-06
Usp11	1346.45	1050.21	1310.06	736.881	713.443	962.771	-0.618754	7.02318e-06
Coq4	300.019	283.547	278.714	191.149	182.883	182.66	-0.631102	7.07641e-06
Gm5425	160.91	134.364	126.308	74.5483	66.3201	78.0111	-0.944587	7.11484e-06
Gsg2	317.667	376.416	348.653	231.291	220.062	232.131	-0.609585	7.55072e-06
Rpl35a	583.427	460.393	393.54	184.459	191.926	336.78	-1.01048	7.57938e-06
Lacc1	613.533	621.432	536.55	258.052	319.542	444.283	-0.793613	7.68623e-06
Gm7332	78.8976	67.1819	61.5884	24.8494	20.097	34.2488	-1.38776	7.71236e-06
A630089N07Rik	167.138	176.846	193.116	94.619	109.529	102.746	-0.807955	7.77487e-06
Kctd11	318.705	332.945	332.995	141.451	162.786	239.741	-0.855475	7.90516e-06
Gar1	2743.77	2246.64	2372.72	1812.1	1659.01	1122.6	-0.680712	7.96449e-06
Rab26os	28.0294	18.7714	27.1407	4.77874	2.0097	4.75677	-2.66921	8.07486e-06
E130218I03Rik	336.353	221.305	243.222	96.5305	112.543	173.147	-1.06617	8.4496e-06
Fance	554.36	592.781	489.576	277.167	268.295	415.742	-0.767466	8.55289e-06
Hilpda	471.309	427.79	460.347	287.68	238.149	337.731	-0.65349	8.56301e-06
Cmss1	361.268	324.054	370.574	207.397	255.232	173.147	-0.732768	8.6148e-06
Tmem223	193.092	197.594	185.809	118.513	102.495	117.968	-0.765457	8.69724e-06
Hoxc6	864.759	1214.21	1140.95	570.581	610.949	807.7	-0.694782	8.72408e-06
Gm14321	170.253	235.137	198.336	80.2828	81.3928	132.238	-1.0379	8.94586e-06
LOC108168049	111.08	111.64	80.3781	41.0971	35.1697	55.1786	-1.20397	9.10074e-06
Cars2	318.705	380.368	374.75	243.716	215.038	238.79	-0.622159	9.20774e-06
Tmem69	379.954	351.717	350.741	207.397	222.072	266.379	-0.636936	9.37185e-06
Gcnt4	1346.45	1235.95	1289.18	539.042	714.448	1009.39	-0.774611	9.43186e-06
Nudt8	439.128	360.609	342.39	161.521	137.664	271.136	-1.00078	9.43605e-06
Zfp971	262.646	265.764	299.591	159.61	189.917	168.39	-0.677435	9.57724e-06
Bgn	58.1351	50.3864	52.1936	21.0264	22.1067	13.319	-1.51153	9.63964e-06
Gm42162	53.9826	76.0736	48.0181	27.7167	16.0776	12.3676	-1.66512	1.00374e-05
St6galnac6	940.543	1066.02	1029.26	552.422	608.939	815.311	-0.618859	1.01438e-05
Pnpla6	324.934	348.753	422.768	240.848	241.164	194.076	-0.697777	1.04956e-05
Mfsd3	250.189	249.956	236.959	112.778	75.3637	165.536	-1.05767	1.05108e-05
Thap1	302.095	309.234	259.924	200.707	151.732	177.903	-0.715578	1.06353e-05
Chchd1	800.396	707.386	674.341	330.689	331.6	565.105	-0.829614	1.07572e-05
Ndufb7	880.331	741.965	762.026	492.21	413.998	617.429	-0.645338	1.0983e-05
Fam189b	831.539	981.053	860.15	410.016	350.693	689.732	-0.881411	1.11442e-05
Gm8186	248.112	385.308	225.476	159.61	154.747	131.287	-0.947801	1.13118e-05
Wdr46	1124.29	1137.15	1129.47	863.996	777.754	550.835	-0.629234	1.21357e-05
Klhl42	232.54	281.571	325.688	134.76	121.587	193.125	-0.900733	1.3584e-05
Tsen54	313.514	365.548	374.75	225.556	249.203	208.347	-0.626272	1.37105e-05
Otud3	643.638	547.335	611.709	429.131	412.993	290.163	-0.671094	1.37119e-05
Lrwd1	1040.2	1191.49	1031.35	677.625	617.983	880.003	-0.584561	1.39377e-05
E2f4	4152.51	3877.78	3908.26	3031.63	2862.82	1940.76	-0.607647	1.49692e-05
Surf1	515.949	564.13	470.786	196.884	235.135	389.104	-0.917088	1.50363e-05
Ckmt1	74.7451	80.0255	85.5975	20.0707	26.1261	45.665	-1.38591	1.5137e-05
4933440N22Rik	234.617	229.209	238.003	104.176	97.4704	168.39	-0.922048	1.66935e-05
Gm15710	297.942	290.463	358.048	95.5747	121.587	221.666	-1.10802	1.67033e-05
S100a6	19379.7	17948.4	18090.3	10786.6	10831.3	15390.1	-0.58251	1.6722e-05
Slc27a3	85.1264	77.0616	85.5975	43.0086	39.1891	25.6866	-1.20037	1.68282e-05
Lockd	333.239	318.126	274.538	90.796	127.616	215.006	-1.09464	1.71054e-05
Rmrp	24.915	12.8436	13.5703	0.955747	0	0	-5.61982	1.71472e-05
D330050I16Rik	102.775	112.628	94.9923	62.1236	42.2037	41.8596	-1.08571	1.72942e-05
Gm6560	430.823	485.093	431.119	287.68	238.149	337.731	-0.640786	1.75137e-05
Commd4	484.805	554.25	540.725	269.521	322.557	405.277	-0.663484	1.79301e-05
Rnaset2a	425.632	350.729	354.916	259.008	241.164	251.158	-0.589878	1.80391e-05
Kcnk5	114.194	128.436	126.308	48.7431	57.2764	77.0598	-1.01039	1.81778e-05
A230020J21Rik	143.261	165.979	174.327	90.796	100.485	74.2057	-0.866443	1.83361e-05
Gm8566	107.965	129.424	85.5975	60.2121	45.2182	42.811	-1.12403	1.849e-05
1600002K03Rik	131.842	100.773	90.8168	51.6104	58.2813	36.1515	-1.1487	1.86939e-05
Eml1	1543.69	1711.16	1559.54	882.155	986.763	1331.9	-0.588838	1.87539e-05
Mir703	191.015	138.316	135.703	57.3448	97.4704	66.5948	-1.07243	1.88079e-05
Gm13461	63.3257	62.242	75.1588	29.6282	21.1018	31.3947	-1.28604	1.89717e-05
Pih1d1	945.733	854.593	773.509	241.804	211.018	453.796	-1.50505	1.91698e-05
Tmem17	102.775	75.0856	78.2904	18.1592	22.1067	48.5191	-1.52581	1.92565e-05
Dhrs13	336.353	327.018	281.845	199.751	191.926	220.714	-0.625973	1.92885e-05
Qtrt1	681.011	559.19	607.533	459.714	410.984	315.85	-0.638968	2.01557e-05
Impa2	202.435	254.896	220.257	76.4598	56.2716	151.265	-1.25302	2.0203e-05
Ccna2	3897.13	4255.18	4013.69	2500.24	2125.26	3389.68	-0.601931	2.18996e-05
Cenpm	458.852	442.61	421.724	155.787	154.747	331.072	-1.04347	2.21214e-05
Sost	16.61	8.89172	6.26323	0	0	0	-5.88991	2.22614e-05
Rpl29	95.5076	51.3744	89.773	16.2477	25.1212	39.0056	-1.55583	2.28507e-05
Slc35a2	387.221	378.392	368.487	261.875	272.314	198.833	-0.63039	2.4633e-05
Bckdhb	505.568	472.249	410.242	299.149	345.668	252.109	-0.630924	2.49324e-05
Mrps33	445.356	400.127	451.996	274.299	259.251	332.023	-0.582991	2.50416e-05
Rerg	106.927	111.64	111.694	56.3891	59.2861	58.984	-0.919337	2.55958e-05
Mpv17l2	458.852	463.357	451.996	280.034	235.135	356.758	-0.655412	2.59755e-05
Zfp651	493.11	425.815	456.172	273.344	260.256	356.758	-0.626156	2.60231e-05
Dock3	114.194	68.1698	84.5536	22.9379	48.2328	13.319	-1.66404	2.69245e-05
Rps14	13828.9	9424.23	9813.44	7433.8	6759.63	7913.37	-0.580841	2.89963e-05
Gm561	166.1	141.28	139.879	75.504	93.451	80.8652	-0.841057	2.91001e-05
B3galt6	153.643	148.195	184.765	77.4155	78.3783	107.503	-0.884567	3.00234e-05
Gm21145	20.7625	19.7594	28.1845	2.86724	2.0097	6.65948	-2.56451	3.03538e-05
B230217O12Rik	90.317	60.2661	72.0271	26.7609	20.097	39.9569	-1.35441	3.14324e-05
Scfd2	241.883	204.51	197.292	119.468	120.582	145.557	-0.73846	3.14745e-05
Gm8210	320.781	295.403	317.337	132.849	121.587	234.033	-0.933178	3.31008e-05
Zfp511	499.339	439.646	548.033	285.768	238.149	380.542	-0.716176	3.38398e-05
Slx1b	186.863	268.728	238.003	131.893	131.635	145.557	-0.762134	3.4975e-05
Taf6l	182.71	226.245	197.292	124.247	131.635	105.6	-0.747447	3.59202e-05
LOC108167857	56.0588	68.1698	60.5446	14.3362	11.0533	34.2488	-1.62721	3.60472e-05
Sod2	907.323	959.318	943.66	543.82	517.498	782.014	-0.608007	3.63135e-05
Skiv2l2	1898.73	1828.73	1883.14	1377.23	1429.9	912.349	-0.593259	3.6445e-05
Trim37	1038.13	1260.65	1095.02	573.448	654.157	924.717	-0.656942	3.66839e-05
Slc22a14	60.2113	68.1698	57.4129	10.5132	10.0485	34.2488	-1.75702	3.76716e-05
Pmvk	289.637	278.607	245.31	121.38	115.558	201.687	-0.890239	3.78815e-05
A330009N23Rik	77.8595	53.3503	65.7639	17.2035	13.063	36.1515	-1.5634	3.8177e-05
Slc25a4	8162.79	7943.27	7404.18	2800.34	3007.52	4918.51	-1.13211	3.82149e-05
Mtg2	718.384	709.362	688.955	375.609	421.032	578.424	-0.622013	3.87124e-05
Gm20071	387.221	461.381	434.251	149.097	167.81	325.363	-0.997545	3.93708e-05
Anapc13	294.828	284.535	260.968	204.53	157.761	174.098	-0.64699	3.98211e-05
Lbhd1	246.036	252.92	243.222	123.291	136.66	183.612	-0.742109	4.10304e-05
Tnfaip8l1	248.112	257.86	238.003	162.477	135.655	173.147	-0.657811	4.17315e-05
Als2cl	224.235	187.714	221.301	109.911	133.645	138.898	-0.727172	4.26332e-05
Lsmem2	60.2113	64.218	59.5007	31.5397	24.1164	21.8812	-1.24593	4.29429e-05
Gm6477	335.315	287.499	279.758	176.813	154.747	222.617	-0.702522	4.60274e-05
Klf15	53.9826	39.5188	45.9303	8.60173	19.0921	19.0271	-1.57894	4.91368e-05
Emilin1	194.13	245.016	186.853	130.937	123.597	123.676	-0.727825	5.07736e-05
Arl2	810.777	660.951	673.297	421.485	363.756	571.764	-0.659859	5.2026e-05
Mrpl46	258.494	222.293	231.739	143.362	161.781	152.217	-0.63974	5.35402e-05
Gm5855	203.473	185.738	179.546	75.504	64.3104	136.044	-1.04212	5.58269e-05
Fam120c	509.72	602.661	506.278	237.025	218.052	427.158	-0.875039	5.6901e-05
Mrpl22	527.368	383.332	417.549	310.618	258.246	296.823	-0.616686	6.05848e-05
Cd320	277.18	305.282	232.783	169.167	175.849	178.855	-0.638768	6.4061e-05
C87436	249.15	352.705	300.635	172.99	204.989	186.466	-0.678294	6.57292e-05
Exog	256.417	273.667	297.503	187.326	193.936	154.12	-0.628952	6.58849e-05
Thg1l	256.417	205.498	197.292	100.353	115.558	156.022	-0.824952	6.6652e-05
Dok3	39.4488	30.627	30.2723	10.5132	13.063	3.80542	-1.87957	6.95258e-05
Ccdc92	296.904	287.499	287.065	199.751	198.96	129.384	-0.723442	7.23529e-05
Ccdc80	99.6602	135.352	106.475	42.0529	53.257	71.3516	-1.03531	7.31011e-05
Osgep	281.332	271.691	332.995	121.38	118.572	224.52	-0.93053	7.44625e-05
Gdap1l1	51.9063	44.4586	52.1936	19.1149	24.1164	14.2703	-1.37201	7.5278e-05
Ptp4a3	216.968	175.858	191.028	95.5747	114.553	134.141	-0.761484	7.58628e-05
Epb41l4aos	540.864	407.043	434.251	346.936	282.363	279.698	-0.603945	7.61191e-05
Dnah11	112.118	147.207	134.659	42.0529	59.2861	86.5733	-1.06794	7.90865e-05
Gm1943	99.6602	114.604	114.826	61.1678	37.1794	64.6921	-1.01068	7.93009e-05
Gm14303	210.74	306.27	208.774	150.052	101.49	148.411	-0.859342	8.19245e-05
Ccdc124	1217.72	1055.15	1101.28	258.052	305.474	609.819	-1.52374	8.29673e-05
Gm5560	29.0675	22.7233	17.7458	6.69023	5.02425	0	-2.57505	8.34493e-05
Gm8822	270.951	232.173	222.345	171.079	142.689	147.46	-0.652772	8.3899e-05
Fam129c	184.787	201.546	229.652	140.495	126.611	101.795	-0.739824	8.41968e-05
LOC102634300	180.634	190.678	219.213	98.442	116.563	136.995	-0.746043	8.47136e-05
Rps9	22378.9	19418.5	18273	5708.68	6090.4	11329.7	-1.37696	8.54963e-05
Ttf2	652.982	867.437	769.333	358.405	362.751	621.235	-0.770124	8.78953e-05
Zfp668	224.235	237.113	236.959	168.212	148.718	131.287	-0.639811	8.98248e-05
Zdhhc12	286.523	341.837	300.635	189.238	190.921	232.131	-0.601471	9.01162e-05
Gbx1	95.5076	74.0977	75.1588	34.4069	40.194	43.7623	-1.04772	9.0378e-05
Pid1	66.4401	73.1097	69.9394	29.6282	32.1552	37.1028	-1.08297	9.04866e-05
Fam195a	393.45	310.222	318.381	197.84	164.795	256.866	-0.721038	9.09655e-05
Ccdc85c	104.851	134.364	114.826	48.7431	70.3395	67.5462	-0.925587	9.17482e-05
Gm13436	91.3551	92.8691	105.431	43.0086	25.1212	59.9354	-1.1738	9.43486e-05
Siah1b	465.081	390.248	477.049	286.724	252.217	345.342	-0.590235	9.87723e-05
Nek8	236.693	273.667	258.88	104.176	118.572	195.979	-0.876772	9.99757e-05
Shank1	297.942	221.305	226.52	141.451	168.815	151.265	-0.692482	0.00010301
Cby1	362.306	328.006	327.776	156.743	151.732	269.233	-0.81646	0.000104453
Gm8515	134.956	132.388	111.694	72.6368	64.3104	77.0598	-0.824095	0.00010517
Timm10	759.909	532.515	579.349	437.732	442.134	344.39	-0.612501	0.000107353
Cep164	512.835	610.565	563.691	311.574	325.571	461.407	-0.618678	0.000107859
Ccdc166	57.097	73.1097	59.5007	17.2035	31.1503	31.3947	-1.25279	0.000110402
Tecr	1707.72	1725.98	1676.46	814.297	962.646	1469.84	-0.654216	0.000110803
Gm6978	24.915	18.7714	22.9652	2.86724	6.0291	5.70813	-2.19257	0.000111987
LOC102634709	342.582	183.762	241.134	160.566	131.635	119.871	-0.896405	0.000112191
Heatr4	94.4695	60.2661	70.9833	18.1592	41.1988	32.3461	-1.30151	0.000114843
Gm19366	89.2789	67.1819	32.36	30.5839	8.0388	5.70813	-2.0882	0.000116876
BC039966	52.9445	52.3623	41.7549	11.469	19.0921	24.7352	-1.41173	0.000119828
Foxp3	156.757	165.979	157.625	90.796	89.4316	110.357	-0.724613	0.000121182
Zfp213	248.112	251.932	267.231	166.3	149.723	189.32	-0.601453	0.000124169
Luc7l3	1728.48	2045.1	1859.14	705.342	739.57	1250.08	-1.06347	0.000125303
Mrps11	367.497	288.487	317.337	244.671	185.897	200.736	-0.623508	0.000129724
Cyb561d2	151.566	122.508	121.089	74.5483	83.4025	64.6921	-0.828534	0.0001309
Ccdc94	266.799	248.968	252.617	178.725	181.878	152.217	-0.583794	0.000132952
Gpatch3	151.566	84.9653	101.256	52.5661	62.3007	48.5191	-1.04795	0.000136534
Ogn	676.859	650.083	725.491	196.884	264.276	72.303	-1.94424	0.000139392
Snx20	34.2582	16.7955	26.0968	6.69023	4.0194	7.61084	-2.06697	0.000141913
Pgap3	126.651	147.207	178.502	89.8403	73.354	93.2328	-0.817538	0.000143188
Rn7sk	39.4488	14.8195	21.9213	4.77874	5.02425	6.65948	-2.20682	0.000149366
Cc2d2a	452.623	445.574	506.278	236.07	256.237	385.299	-0.677737	0.000156099
Ndufb5	1067.19	960.306	944.704	321.131	334.615	626.943	-1.21216	0.000159071
Palm3	47.7538	38.5308	37.5794	14.3362	13.063	19.0271	-1.41311	0.000161341
Arhgef39	155.719	183.762	217.125	109.911	98.4753	123.676	-0.744198	0.000163205
Fam173b	295.866	268.728	281.845	175.858	218.052	170.293	-0.5861	0.00016755
1810037I17Rik	2107.4	1904.8	1682.72	1025.52	1053.08	1645.84	-0.612483	0.000170992
Gm11273	161.948	166.967	165.976	88.8845	81.3928	120.822	-0.76426	0.000173041
Gm13841	267.837	187.714	332.995	136.672	159.771	156.974	-0.797673	0.000173144
Rpl15	16849.8	14360.1	14581.8	5997.31	6255.19	10223.3	-1.02671	0.000176628
Nmnat1	97.5839	84.9653	102.299	48.7431	48.2328	56.1299	-0.89423	0.000181769
Dnajc30	336.353	298.367	265.143	194.017	129.626	215.958	-0.736495	0.000183157
Hoxa7	88.2408	70.1458	107.519	38.2299	39.1891	52.3245	-1.03296	0.000189015
Serhl	492.072	527.575	539.682	315.397	282.363	433.818	-0.595362	0.000189052
Xrcc2	260.57	267.74	253.661	147.185	148.718	204.541	-0.64323	0.000190753
Fgd3	107.965	108.677	111.694	48.7431	75.3637	52.3245	-0.898578	0.000190759
Gatb	297.942	254.896	318.381	155.787	170.824	223.568	-0.662143	0.000191035
Ift122	413.174	444.586	443.645	218.866	303.465	335.828	-0.601014	0.000195741
Glt8d2	143.261	172.895	159.712	69.7696	92.4462	110.357	-0.804337	0.000198031
E130311K13Rik	228.388	228.221	182.678	83.15	72.3492	161.73	-1.00968	0.000209894
Tssc4	519.063	537.455	505.234	263.786	268.295	440.477	-0.682785	0.000218854
Dpm3	380.992	303.306	281.845	182.548	164.795	247.352	-0.699104	0.000218991
Pafah1b3	624.952	695.53	573.085	321.131	275.329	528.953	-0.750169	0.000221497
Zfand2b	403.831	433.718	410.242	206.441	240.159	343.439	-0.659058	0.000231394
Gnpat	1220.84	1326.84	1236.99	706.297	699.376	1114.04	-0.586668	0.000237125
Toe1	317.667	364.56	308.986	197.84	125.606	249.255	-0.790342	0.000244897
Tcea2	116.27	133.376	125.265	37.2741	51.2473	89.4274	-1.07422	0.000248678
LOC108167320	128.728	149.183	144.054	43.9644	71.3443	97.9896	-0.984271	0.00024873
Smco4	273.027	244.028	255.749	169.167	130.63	194.076	-0.644372	0.000256743
Lsm2	633.257	698.494	625.279	315.397	362.751	556.543	-0.664282	0.000267109
LOC107988026	100.698	111.64	152.405	70.7253	56.2716	70.4003	-0.884041	0.000268671
9330154J02Rik	19.7244	36.5548	20.8774	2.86724	11.0533	3.80542	-2.13579	0.000272712
Ptrhd1	200.358	141.28	192.072	111.822	82.3977	115.114	-0.784605	0.000273487
Uqcc3	120.423	116.58	96.0362	74.5483	52.2522	55.1786	-0.87117	0.000275199
H2afx	836.73	869.413	812.132	403.325	365.765	729.689	-0.748213	0.000282405
Pigv	166.1	159.063	158.668	54.4776	86.4171	116.065	-0.912788	0.000289078
Snora73b	19.7244	32.603	31.3161	5.73448	7.03395	11.4163	-1.78896	0.000299482
Fancc	131.842	181.786	168.063	43.0086	30.1455	114.163	-1.36074	0.000305984
Slc2a4rg-ps	122.499	99.7848	144.054	69.7696	74.3589	62.7894	-0.823682	0.000315738
Ebp	558.512	708.374	644.069	334.512	335.62	540.37	-0.658393	0.000317582
Snord96a	197.244	136.34	175.37	92.7075	94.4559	115.114	-0.750168	0.000328253
2810006K23Rik	159.871	187.714	201.467	106.088	84.4074	134.141	-0.75663	0.000334744
Snora65	99.6602	115.592	89.773	34.4069	45.2182	70.4003	-1.0234	0.000355858
Fuz	292.752	222.293	288.109	160.566	122.592	201.687	-0.726352	0.000357439
Ncaph2	5440.82	5762.82	5292.43	2421.86	2225.74	3878.67	-0.952098	0.00035889
Ppm1m	536.711	636.252	522.98	276.211	301.455	479.483	-0.681689	0.000359741
Mylk	239.807	287.499	315.249	129.982	135.655	224.52	-0.780739	0.00037695
Ttc27	877.217	787.411	827.79	603.077	663.201	392.91	-0.587473	0.000380856
B9d2	380.992	285.523	337.171	127.114	170.824	265.428	-0.832491	0.000384253
Metrn	3776.7	3568.54	3604.49	1531.11	1522.35	2579.12	-0.958973	0.000387012
Grcc10	754.718	647.12	655.551	295.326	308.489	593.645	-0.780331	0.000388045
Rps3	26367.4	20899.5	20301.2	12543.2	12440	19479.9	-0.603712	0.00039221
Rmnd1	276.142	389.26	340.302	179.681	171.829	265.428	-0.704679	0.000392337
A930001C03Rik	31.1438	54.3383	32.36	15.292	14.0679	14.2703	-1.43563	0.000393303
G430095P16Rik	32.1819	43.4706	27.1407	6.69023	7.03395	18.0757	-1.68967	0.000393626
Gm19327	35.2963	20.7473	32.36	12.4247	9.04365	5.70813	-1.70021	0.000403515
Gm6091	32.1819	54.3383	17.7458	4.77874	1.00485	15.2217	-2.30428	0.000408281
LOC102638150	71.6307	50.3864	32.36	25.8052	10.0485	1.90271	-2.03084	0.000411172
Ttll5	267.837	327.018	256.792	129.026	182.883	213.104	-0.698526	0.000432176
Zfp764	160.91	169.931	180.59	98.442	107.519	121.773	-0.641726	0.000434929
Rep15	14.5338	6.91578	8.35097	0.955747	0	0	-4.83492	0.000436702
Lars2	8597.76	7925.49	7872.88	2610.15	3546.12	5376.11	-1.08095	0.000437625
Fbxo4	447.433	445.574	479.137	265.698	259.251	391.007	-0.582326	0.000442537
Cdca7l	697.621	802.231	750.544	210.264	226.091	466.164	-1.31794	0.00044365
Mien1	296.904	227.233	198.336	107.044	106.514	185.514	-0.855267	0.000445709
Dkk2	220.083	241.064	215.038	110.867	143.694	172.195	-0.664278	0.000450921
Cmc2	627.028	559.19	578.305	295.326	260.256	509.926	-0.727031	0.000468327
Rnaseh2c	246.036	221.305	264.1	148.141	125.606	191.222	-0.651969	0.000487389
H3f3a-ps1	96.5458	77.0616	62.6323	51.6104	29.1406	29.492	-1.09803	0.00049235
Smim4	148.452	100.773	126.308	78.3713	61.2958	74.2057	-0.810004	0.000493601
Ict1	520.101	492.008	462.435	232.247	220.062	424.304	-0.749589	0.000502448
Zfp653	202.435	165.979	208.774	130.937	131.635	107.503	-0.641004	0.000503738
Gtf3a	1342.3	1468.12	1287.09	789.447	715.453	1227.25	-0.584474	0.000505613
Gm12115	32.1819	22.7233	37.5794	10.5132	13.063	7.61084	-1.5699	0.000507128
6430562O15Rik	23.8769	31.615	17.7458	7.64598	6.0291	7.61084	-1.78278	0.000515836
LOC102633784	9.34314	5.92781	25.0529	0.955747	2.0097	0	-3.78289	0.00051777
Prdm10	223.197	259.836	238.003	144.318	123.597	190.271	-0.653245	0.000518305
Tgm4	179.596	142.268	133.616	101.309	95.4607	61.8381	-0.817265	0.000533991
Smad6	49.8301	40.5067	50.1058	15.292	21.1018	24.7352	-1.19923	0.000547921
Snta1	270.951	320.102	275.582	162.477	180.873	231.179	-0.593093	0.000549481
Chek2	375.802	471.261	437.382	189.238	242.169	355.807	-0.706188	0.000568579
Acaa2	352.963	350.729	349.697	200.707	205.994	296.823	-0.581675	0.000572016
Lrrc45	318.705	381.356	375.794	174.902	183.888	301.58	-0.703587	0.000576203
Rita1	199.32	193.642	197.292	100.353	151.732	123.676	-0.652899	0.000586965
Gm10263	86.1645	81.0134	73.071	46.8316	33.16	8.56219	-1.44105	0.000604137
Fanca	673.744	999.824	815.264	470.228	483.333	692.586	-0.596378	0.000614982
2610203C22Rik	12.4575	17.7834	15.6581	1.91149	4.0194	2.85406	-2.39268	0.000625854
Hoxa5	170.253	207.473	185.809	124.247	113.548	133.19	-0.603075	0.000652372
Hexdc	181.672	220.317	209.818	97.4862	116.563	159.828	-0.710301	0.000662889
Cln6	443.28	484.105	433.207	172.035	202.98	391.007	-0.828333	0.000663586
Ankrd23	113.156	107.689	160.756	65.9466	74.3589	78.9625	-0.798504	0.000675524
Sult1a1	23.8769	16.7955	27.1407	7.64598	7.03395	4.75677	-1.80234	0.000684393
Hoxd8	182.71	188.702	160.756	114.69	108.524	126.53	-0.605416	0.000688104
LOC108167895	17.6482	8.89172	22.9652	3.82299	4.0194	0.951355	-2.49672	0.0006883
Gm12166	110.041	82.9894	85.5975	54.4776	57.2764	31.3947	-0.962168	0.000694503
Pigg	444.318	538.443	515.673	223.645	291.406	423.353	-0.675043	0.000711424
LOC102636101	92.3933	69.1578	50.1058	38.2299	36.1746	17.1244	-1.21119	0.000748966
9430038I01Rik	93.4314	83.9773	55.3252	29.6282	22.1067	51.3732	-1.17209	0.000769363
Lncppara	58.1351	82.9894	60.5446	39.1856	28.1358	33.2974	-1.00306	0.000771352
Acss2	142.223	179.81	106.475	70.7253	95.4607	77.0598	-0.81927	0.000796896
Astl	237.731	224.269	240.09	86.0173	148.718	176.001	-0.773583	0.000805721
Snord69	50.8682	22.7233	29.2284	15.292	10.0485	9.51355	-1.55766	0.000815091
Fndc4	53.9826	76.0736	80.3781	26.7609	31.1503	44.7137	-1.03531	0.000833976
Ppih	148.452	173.883	106.475	82.1943	74.3589	93.2328	-0.779964	0.00086342
Tmem265	60.2113	71.1338	87.6852	36.3184	40.194	39.0056	-0.923116	0.000874983
Nme7	261.608	307.258	263.056	135.716	146.708	232.131	-0.692701	0.000889941
Pigyl	253.303	188.702	187.897	110.867	134.65	153.168	-0.659496	0.000901252
Particl	112.118	86.9413	105.431	48.7431	43.2085	73.2543	-0.879456	0.00090478
Slc25a26	127.69	106.701	122.133	81.2385	56.2716	74.2057	-0.749495	0.000918238
Gm15564	127.69	87.9292	96.0362	43.9644	53.257	71.3516	-0.885287	0.000925428
Lcmt1	316.629	327.018	268.275	164.389	183.888	251.158	-0.605125	0.000926754
D130037M23Rik	243.96	295.403	259.924	128.07	130.63	223.568	-0.728269	0.000935341
Rpl18	25288.8	20613	19917.1	9180.91	9188.35	15492.8	-0.958821	0.000971198
Zfp446	116.27	133.376	136.747	97.4862	68.3298	60.8867	-0.768832	0.000991126
Gm5148	161.948	110.653	160.756	102.265	61.2958	81.8165	-0.818037	0.000995636
Ablim1	13.4956	6.91578	14.6142	2.86724	0	0.951355	-3.17743	0.00109532
Gm7816	23.8769	20.7473	18.7897	4.77874	10.0485	2.85406	-1.85288	0.00110851
LOC108167562	41.5251	35.5669	42.7987	24.8494	13.063	6.65948	-1.42622	0.00120297
4930526I15Rik	144.3	120.532	134.659	57.3448	77.3734	99.8923	-0.767189	0.00124231
Pebp1	7142.31	6874.29	6144.23	2396.06	2807.55	4709.21	-1.02417	0.00124895
Prkag2	216.968	292.439	204.599	146.229	178.863	139.849	-0.620749	0.00124968
Awat2	22.8388	9.87969	16.7019	1.91149	5.02425	3.80542	-2.20529	0.00126807
Pet100	144.3	114.604	100.212	71.6811	59.2861	80.8652	-0.760049	0.00129004
Lamtor2	638.448	691.578	640.937	297.237	341.649	597.451	-0.672515	0.00130011
LOC108168813	86.1645	97.8089	90.8168	52.5661	35.1697	63.7408	-0.856884	0.00134009
Rmi2	116.27	146.219	120.045	57.3448	56.2716	99.8923	-0.84037	0.00135243
1110034G24Rik	61.2495	90.8931	63.6762	25.8052	29.1406	49.4705	-1.04718	0.00135885
Tubb4b-ps1	50.8682	59.2781	58.4568	22.9379	23.1115	37.1028	-1.01811	0.00144206
Gm16418	64.3638	50.3864	64.72	37.2741	22.1067	30.4434	-0.994858	0.00145725
Hmgn2	727.727	328.006	278.714	129.982	132.64	199.785	-1.52878	0.0014841
Fibin	23.8769	17.7834	30.2723	7.64598	11.0533	3.80542	-1.6812	0.00149712
Mon1a	146.376	205.498	146.142	113.734	108.524	61.8381	-0.81152	0.00151381
Fam69b	64.3638	53.3503	44.8865	12.4247	23.1115	35.2001	-1.20027	0.00158344
Hddc3	328.048	328.994	318.381	136.672	167.81	285.406	-0.725038	0.00160888
Bcl2l12	130.804	113.616	149.274	62.1236	52.2522	103.698	-0.849836	0.00163764
Gm10036	46.7157	53.3503	54.2813	21.9822	25.1212	30.4434	-0.992773	0.00165853
Rpl30-ps1	34.2582	31.615	27.1407	11.469	11.0533	15.2217	-1.29966	0.00168174
Lipt2	100.698	86.9413	72.0271	30.5839	45.2182	60.8867	-0.925587	0.00172942
Arpin	1582.1	1545.18	1588.77	648.952	619.992	1176.83	-0.947166	0.00175648
Naa10	872.026	903.991	816.308	315.397	263.271	598.402	-1.13883	0.00176958
Cep131	238.769	335.909	293.328	102.265	119.577	249.255	-0.881176	0.00182857
2610035D17Rik	72.6689	58.2902	56.3691	28.6724	30.1455	39.9569	-0.921914	0.00186983
Gm34220	67.4782	74.0977	72.0271	45.8759	41.1988	32.3461	-0.839689	0.00191891
Tk1	1652.7	2004.59	1781.89	387.078	385.862	1072.18	-1.55959	0.00194098
Igflr1	72.6689	63.23	101.256	30.5839	38.1843	54.2272	-0.945334	0.00215551
LOC105246506	73.707	70.1458	78.2904	40.1414	35.1697	50.4218	-0.818928	0.0021761
Gm7063	2.07625	7.90375	5.21936	0	0	0	-4.83003	0.00223956
Mir3064	47.7538	53.3503	58.4568	14.3362	22.1067	37.1028	-1.11605	0.00227165
Gm9767	59.1732	50.3864	56.3691	26.7609	29.1406	32.3461	-0.910024	0.0022882
Snhg20	228.388	250.944	277.67	137.628	128.621	217.86	-0.643881	0.00229074
LOC108168281	24.915	32.603	22.9652	6.69023	7.03395	15.2217	-1.47294	0.00238063
Gm12500	98.622	104.725	104.387	76.4598	56.2716	56.1299	-0.703618	0.00243289
Fam3a	278.218	332.945	325.688	163.433	186.902	272.088	-0.589589	0.00245858
Tbc1d30	56.0588	50.3864	41.7549	20.0707	28.1358	26.6379	-0.987174	0.00253866
Gpr68	33.2201	25.6872	30.2723	14.3362	9.04365	13.319	-1.27656	0.00260696
Gm40443	64.3638	64.218	70.9833	35.3627	36.1746	41.8596	-0.814592	0.00262908
Agt	26.9913	30.627	17.7458	6.69023	14.0679	1.90271	-1.74506	0.0026294
Uckl1os	32.1819	21.7353	25.0529	1.91149	15.0727	7.61084	-1.69118	0.00265451
Gm5113	55.0207	57.3022	61.5884	35.3627	33.16	25.6866	-0.885054	0.00268392
Zfp873	42.5632	39.5188	42.7987	16.2477	25.1212	19.0271	-1.05055	0.00273653
Rps19-ps6	124.575	117.568	160.756	97.4862	63.3055	86.5733	-0.701453	0.00274238
C8g	50.8682	69.1578	77.2465	27.7167	43.2085	34.2488	-0.90975	0.00288136
Olfml3	23.8769	15.8075	14.6142	4.77874	6.0291	5.70813	-1.71757	0.00289607
Bsn	632.219	607.601	660.771	331.644	298.44	597.451	-0.630077	0.00290275
Hdac10	575.122	671.819	619.016	182.548	213.028	433.818	-1.1696	0.00290564
1600002H07Rik	188.939	296.391	213.994	112.778	137.664	185.514	-0.682243	0.00296001
Rac3	47.7538	72.1217	80.3781	45.8759	31.1503	23.7839	-0.990099	0.00311492
Ssbp4	1138.82	1220.14	1126.34	475.962	493.381	899.982	-0.898643	0.0031923
LOC108168897	20.7625	41.4947	21.9213	2.86724	7.03395	16.173	-1.69036	0.00319907
1110001J03Rik	156.757	116.58	143.01	73.5925	91.4413	101.795	-0.641101	0.00320239
Prkd1	110.041	113.616	110.65	70.7253	77.3734	70.4003	-0.614334	0.00320671
Armc9	170.253	195.618	204.599	154.831	94.4559	123.676	-0.6118	0.0032175
Adcy3	45.6776	44.4586	49.062	23.8937	15.0727	29.492	-1.01965	0.00328641
Gm15459	5954.69	6942.46	5690.14	2491.63	2541.27	4591.24	-0.949569	0.0033064
Gm10390	47.7538	32.603	27.1407	16.2477	20.097	7.61084	-1.29403	0.00335302
Asic1	122.499	148.195	114.826	67.8581	66.3201	102.746	-0.701892	0.00335877
Draxin	26.9913	36.5548	18.7897	8.60173	12.0582	11.4163	-1.36398	0.00338836
Kcnab2	128.728	148.195	134.659	56.3891	77.3734	112.26	-0.742189	0.00339648
Tha1	63.3257	66.1939	77.2465	31.5397	34.1649	49.4705	-0.842548	0.00343519
Rpl14	10319	10515	9732.01	4686.99	5027.26	8106.5	-0.778354	0.00343799
4930413G21Rik	259.532	253.908	220.257	184.459	105.509	184.563	-0.627318	0.0034527
9230114K14Rik	83.0501	81.0134	101.256	51.6104	50.2425	59.9354	-0.712184	0.00345937
Plppr3	147.414	89.9052	125.265	86.973	65.3152	65.6435	-0.732603	0.00354069
LOC108168965	12.4575	2.96391	5.21936	0	1.00485	0	-4.30384	0.00363578
Gm35534	19.7244	11.8556	19.8336	3.82299	8.0388	2.85406	-1.81189	0.00365289
Rpl22	5460.55	4679.02	4600.34	2412.31	2402.6	3911.97	-0.756152	0.00377851
Pkn3	546.055	679.723	593.963	172.99	231.115	425.256	-1.13354	0.0037798
Smarca5-ps	63.3257	55.3263	56.3691	37.2741	26.1261	33.2974	-0.853598	0.00379118
LOC108167871	48.7919	53.3503	51.1497	29.6282	26.1261	27.5893	-0.878823	0.00384326
LOC108167613	10.3813	18.7714	12.5265	3.82299	3.01455	3.80542	-1.96973	0.00392852
Acot1	101.736	76.0736	85.5975	38.2299	48.2328	65.6435	-0.790901	0.00395604
Aunip	193.092	283.547	232.783	129.026	118.572	201.687	-0.658603	0.00403695
Ptpra	2356.55	2539.08	2334.1	1064.7	1150.55	1904.61	-0.811293	0.00405015
Ccdc142	133.918	137.328	158.668	115.645	82.3977	83.7192	-0.608446	0.00411079
Gm11942	191.015	132.388	85.5975	82.1943	84.4074	65.6435	-0.817012	0.00424559
Prr18	32.1819	46.4345	45.9303	20.0707	25.1212	15.2217	-1.04737	0.00424908
Flrt1	52.9445	55.3263	64.72	15.292	32.1552	39.0056	-1.00113	0.00437225
Rin1	4880.23	5417.03	5456.32	2243.14	2298.09	4072.75	-0.8709	0.004414
Mir6481	5.19063	4.93984	15.6581	0	0	1.90271	-3.73595	0.00441907
Muc6	37.3726	35.5669	40.711	15.292	26.1261	9.51355	-1.16346	0.00447143
Mroh6	29.0675	30.627	36.5355	18.1592	11.0533	14.2703	-1.14275	0.00454796
LOC108167435	16.61	18.7714	12.5265	4.77874	6.0291	3.80542	-1.71825	0.00458184
Adgre5	47.7538	35.5669	48.0181	15.292	29.1406	19.9785	-1.03035	0.00464944
Mira	67.4782	52.3623	54.2813	30.5839	28.1358	38.0542	-0.84528	0.0047259
Hmgb1-ps7	46.7157	35.5669	37.5794	21.9822	18.0873	19.9785	-0.995273	0.00475786
Gm7331	60.2113	68.1698	79.3342	30.5839	32.1552	52.3245	-0.850317	0.00488015
LOC105247253	19.7244	22.7233	29.2284	6.69023	10.0485	11.4163	-1.34819	0.00492449
Dlk2	164.024	164.991	151.361	78.3713	84.4074	139.849	-0.665666	0.00498017
Adm2	70.5926	54.3383	55.3252	27.7167	45.2182	20.9298	-0.944956	0.00500774
Rnaset2b	220.083	362.585	392.496	113.734	75.3637	204.541	-1.30827	0.00501387
BC068281	95.5076	135.352	110.65	69.7696	63.3055	83.7192	-0.65562	0.00505542
Gm10277	12.4575	14.8195	24.009	1.91149	4.0194	8.56219	-1.81905	0.00515625
Gm35798	65.402	70.1458	81.422	24.8494	31.1503	58.0327	-0.926191	0.00524002
Dapk1	70.5926	51.3744	44.8865	36.3184	25.1212	27.5893	-0.904491	0.00528806
2310040G24Rik	11.4194	2.96391	9.39484	0	1.00485	0.951355	-3.60919	0.00534468
Scarna9	14.5338	6.91578	8.35097	2.86724	2.0097	0	-2.61485	0.00542204
Hoxa6	46.7157	72.1217	64.72	41.0971	26.1261	33.2974	-0.867798	0.00559074
Zfp383	216.968	251.932	231.739	139.539	117.567	208.347	-0.589063	0.005598
Gm14150	47.7538	72.1217	55.3252	26.7609	21.1018	42.811	-0.948681	0.0056183
Rps13-ps1	52.9445	44.4586	58.4568	26.7609	31.1503	28.5406	-0.849953	0.00569769
Mir6236	12.4575	25.6872	2.08774	1.91149	4.0194	0	-2.77986	0.00578356
Six5	124.575	175.858	171.195	91.7517	121.587	100.844	-0.587666	0.00579423
Gm36008	2.07625	4.93984	5.21936	0	0	0	-4.51514	0.00582048
Eng	85.1264	102.749	82.4659	34.4069	40.194	75.157	-0.851217	0.00590992
Ttc32	134.956	128.436	127.352	60.2121	63.3055	114.163	-0.715772	0.00617618
Gm42225	29.0675	29.6391	39.6671	18.1592	15.0727	13.319	-1.07836	0.00625938
Omp	53.9826	45.4466	57.4129	28.6724	28.1358	31.3947	-0.828772	0.00629959
Gm40309	50.8682	29.6391	51.1497	20.0707	28.1358	16.173	-1.03325	0.00640564
Gm4045	11.4194	12.8436	12.5265	3.82299	2.0097	3.80542	-1.9268	0.00642317
Mir3960	12.4575	11.8556	6.26323	0.955747	1.00485	3.80542	-2.39917	0.00653198
Gm6087	52.9445	16.7955	33.4039	21.0264	8.0388	9.51355	-1.41381	0.00681277
Coq3	300.019	264.776	273.494	141.451	140.679	262.574	-0.620978	0.00698645
Ank1	126.651	139.304	144.054	60.2121	90.4365	111.309	-0.646451	0.00705615
Snora7a	33.2201	37.5428	20.8774	5.73448	15.0727	17.1244	-1.27569	0.00709053
Galk1	1045.39	1041.32	946.792	411.927	411.988	808.652	-0.893698	0.00723338
Zswim7	138.071	112.628	80.3781	46.8316	61.2958	85.6219	-0.772707	0.00725715
2700038G22Rik	72.6689	95.833	88.7291	56.3891	41.1988	60.8867	-0.69752	0.00725908
Tuba1b	12859.3	14808.7	14521.3	6551.65	6520.47	11391.5	-0.786225	0.0072755
Gm19426	20.7625	37.5428	31.3161	7.64598	4.0194	20.9298	-1.45389	0.00739473
Ska1	930.161	956.354	879.984	268.565	245.183	659.289	-1.23765	0.0074094
Gm6958	5.19063	8.89172	11.4826	1.91149	0	1.90271	-2.72709	0.00747136
Pemt	100.698	52.3623	78.2904	37.2741	51.2473	42.811	-0.816536	0.00756256
Mmp24	256.417	259.836	257.836	117.557	129.626	244.498	-0.653973	0.00766678
LOC108168276	12.4575	9.87969	10.4387	1.91149	5.02425	0	-2.25898	0.00772164
LOC102641016	19.7244	3.95188	10.4387	0	4.0194	1.90271	-2.53773	0.00772448
Hotairm1	60.2113	63.23	83.5097	36.3184	36.1746	49.4705	-0.760968	0.00778499
9030617O03Rik	753.68	807.17	789.167	270.477	298.44	608.867	-0.996434	0.00784065
Mtag2	6.22876	4.93984	10.4387	0	2.0097	0	-3.46406	0.00794569
Csdc2	5.19063	2.96391	8.35097	0	1.00485	0	-3.98102	0.00801006
Rpl39-ps	106.927	89.9052	94.9923	53.5219	75.3637	59.9354	-0.629351	0.00803407
Rpl13-ps3	19.7244	15.8075	6.26323	4.77874	1.00485	4.75677	-1.97877	0.00806842
Rps12-ps4	59.1732	58.2902	59.5007	27.7167	29.1406	44.7137	-0.799248	0.00813341
Gm5873	21.8007	27.6631	13.5703	11.469	5.02425	6.65948	-1.44327	0.00813477
Lenep	36.3344	27.6631	49.062	14.3362	21.1018	19.9785	-1.02809	0.00814709
4930404I05Rik	33.2201	26.6752	35.4916	14.3362	15.0727	17.1244	-1.03367	0.00825775
Gm11478	72.6689	65.2059	60.5446	26.7609	52.2522	34.2488	-0.8122	0.00826149
Pfkfb3	40.4869	30.627	33.4039	19.1149	19.0921	14.2703	-0.994329	0.00831878
Nol4l	36.3344	28.6511	28.1845	21.9822	7.03395	11.4163	-1.19923	0.00867169
Klhl30	96.5458	139.304	106.475	57.3448	65.3152	92.2814	-0.671738	0.00875358
Smarca1	5.19063	9.87969	7.3071	0	1.00485	1.90271	-2.94541	0.00892404
Zfp341	90.317	88.9172	80.3781	67.8581	45.2182	51.3732	-0.657459	0.00901319
Gm9826	13.4956	19.7594	29.2284	4.77874	9.04365	9.51355	-1.42198	0.00901504
Creld1	32.1819	34.5789	40.711	16.2477	21.1018	18.0757	-0.95662	0.00906228
Gm8451	48.7919	43.4706	50.1058	32.4954	22.1067	24.7352	-0.841178	0.00909636
Gm20005	160.91	119.544	130.484	93.6632	66.3201	108.454	-0.612007	0.00916042
Crocc	242.922	258.848	215.038	118.513	108.524	226.422	-0.659751	0.00928427
Tspan32	74.7451	72.1217	77.2465	34.4069	60.291	40.9083	-0.727507	0.00952132
Krt10	69.5545	59.2781	53.2374	46.8316	18.0873	32.3461	-0.901055	0.00960205
Pdx1	109.003	103.737	99.1678	51.6104	46.2231	91.3301	-0.719543	0.00965005
Hdac9	127.69	180.798	165.976	45.8759	64.3104	145.557	-0.890884	0.00986616
B9d1	132.88	183.762	108.563	48.7431	68.3298	122.725	-0.826366	0.00987995
Peak1os	28.0294	31.615	45.9303	21.0264	16.0776	15.2217	-1.01099	0.00988204
Cryab	230.464	246.992	231.739	86.0173	95.4607	230.228	-0.78372	0.0098887
Gm33624	73.707	39.5188	59.5007	28.6724	27.1309	39.0056	-0.862211	0.0100264
Lrrc48	42.5632	55.3263	67.8517	33.4512	33.16	28.5406	-0.800992	0.0101164
Gm38983	26.9913	17.7834	28.1845	7.64598	5.02425	16.173	-1.33125	0.0101936
Gm38457	100.698	99.7848	70.9833	33.4512	28.1358	79.9138	-0.938034	0.0102403
9830147E19Rik	69.5545	53.3503	59.5007	28.6724	40.194	39.9569	-0.745273	0.010827
Gm36796	31.1438	14.8195	24.009	16.2477	1.00485	2.85406	-1.79109	0.0110737
Gm5786	22.8388	21.7353	25.0529	10.5132	12.0582	8.56219	-1.16286	0.0111221
Izumo4	17.6482	18.7714	10.4387	6.69023	2.0097	6.65948	-1.6026	0.0112967
Kcnip3	39.4488	59.2781	42.7987	21.0264	21.1018	34.2488	-0.889632	0.0115248
Nudt15	33.2201	33.5909	32.36	14.3362	10.0485	23.7839	-1.0375	0.0116136
Gpr162	124.575	185.738	209.818	60.2121	70.3395	159.828	-0.840037	0.0116187
Gm17971	38.4107	38.5308	24.009	20.0707	16.0776	14.2703	-1.00257	0.011621
Gm12696	75.7832	83.9773	69.9394	45.8759	37.1794	59.9354	-0.682391	0.0116986
Dalrd3	210.74	313.186	274.538	153.875	134.65	243.547	-0.585103	0.0119088
Myo1g	36.3344	32.603	42.7987	19.1149	12.0582	25.6866	-0.969564	0.0120434
Gm12418	140.147	98.7969	89.773	77.4155	79.3831	42.811	-0.720646	0.012069
Bzrap1	49.8301	37.5428	56.3691	25.8052	25.1212	30.4434	-0.818315	0.0121078
Hist1h4k	10.3813	7.90375	6.26323	1.91149	1.00485	1.90271	-2.34224	0.0122355
Sugp2	480.653	562.154	543.857	145.274	189.917	400.52	-1.10861	0.0122716
Gm7368	7.26689	21.7353	6.26323	2.86724	3.01455	2.85406	-2.01908	0.0123119
LOC108168313	82.012	84.9653	67.8517	34.4069	49.2376	60.8867	-0.700799	0.0123285
Gm16976	74.7451	63.23	81.422	55.4333	47.2279	26.6379	-0.763044	0.0127657
Rps23-ps2	48.7919	63.23	58.4568	40.1414	25.1212	35.2001	-0.761247	0.0127803
Tmprss9	2.07625	2.96391	5.21936	0	0	0	-4.25894	0.0128131
Mir7079	5.19063	2.96391	2.08774	0	0	0	-4.25711	0.0128617
Clvs1	150.528	128.436	108.563	65.9466	84.4074	106.552	-0.592882	0.0128727
LOC101055899	49.8301	27.6631	28.1845	22.9379	14.0679	14.2703	-1.04056	0.0129796
Spsb2	397.602	388.272	377.882	180.636	204.989	388.153	-0.588243	0.0129833
Gm5905	213.854	180.798	144.054	75.504	71.3443	170.293	-0.763228	0.0132048
Rbm3os	19.7244	11.8556	18.7897	1.91149	7.03395	8.56219	-1.52455	0.0132948
Gm6304	18.6863	20.7473	19.8336	4.77874	5.02425	13.319	-1.35335	0.013374
Gm31490	16.61	14.8195	5.21936	3.82299	1.00485	4.75677	-1.927	0.0135451
Rab33a	35.2963	28.6511	53.2374	26.7609	17.0824	15.2217	-0.985514	0.0136511
Gm2830	32.1819	12.8436	25.0529	11.469	7.03395	10.4649	-1.26853	0.013908
Sdhaf4	95.5076	114.604	80.3781	63.0793	50.2425	75.157	-0.623574	0.014033
Amz1	98.622	107.689	91.8607	26.7609	39.1891	92.2814	-0.912943	0.0140837
Gm20762	6.22876	1.97594	2.08774	0	0	0	-4.26263	0.0141807
Tgfbi	65.402	52.3623	66.8078	10.5132	28.1358	50.4218	-1.05001	0.0142795
Gm10269	94.4695	75.0856	73.071	59.2563	30.1455	57.0813	-0.724848	0.0145126
Gm32715	8.30501	18.7714	11.4826	1.91149	4.0194	5.70813	-1.73121	0.0145162
Gm14403	57.097	3.95188	24.009	10.5132	2.0097	10.4649	-1.88074	0.0147988
Hspb2	5.19063	6.91578	2.08774	0	1.00485	0	-3.76979	0.0148591
Ap5b1	125.613	152.147	147.186	72.6368	64.3104	132.238	-0.657348	0.0151035
LOC102634812	34.2582	41.4947	16.7019	20.0707	13.063	3.80542	-1.32621	0.0152121
Gm11007	29.0675	8.89172	13.5703	1.91149	7.03395	7.61084	-1.63826	0.0154603
Gm16853	13.4956	2.96391	21.9213	2.86724	4.0194	2.85406	-1.97698	0.0155048
Trp53-ps	40.4869	67.1819	44.8865	33.4512	24.1164	29.492	-0.809832	0.0156018
Gm5814	11.4194	12.8436	15.6581	0.955747	6.0291	5.70813	-1.65797	0.0157805
Park7	3299.17	3103.21	2883.17	882.155	984.753	2394.56	-1.1236	0.0158144
LOC108167922	60.2113	78.0495	86.6413	41.0971	32.1552	61.8381	-0.733139	0.0159607
Aldh4a1	79.9357	77.0616	63.6762	45.8759	57.2764	37.1028	-0.656425	0.015997
Fam161b	33.2201	31.615	38.6232	20.0707	17.0824	19.0271	-0.879074	0.016089
Gm11221	83.0501	68.1698	79.3342	49.6989	59.2861	39.9569	-0.631462	0.016251
Epgn	6.22876	3.95188	7.3071	0.955747	1.00485	0	-3.16636	0.0165468
Ppp1r3e	26.9913	33.5909	41.7549	19.1149	4.0194	21.8812	-1.17838	0.0166078
Carmn	35.2963	28.6511	24.009	19.1149	10.0485	14.2703	-1.01458	0.0166327
4930507D05Rik	28.0294	19.7594	30.2723	11.469	12.0582	14.2703	-1.04361	0.0166848
LOC100534385	100.698	92.8691	89.773	71.6811	43.2085	70.4003	-0.61028	0.016702
Gm2694	102.775	102.749	100.212	58.3006	54.2619	89.4274	-0.596396	0.0167463
Mslnl	25.9532	27.6631	39.6671	21.0264	11.0533	14.2703	-1.00512	0.0167901
Zfp493	53.9826	49.3984	75.1588	31.5397	25.1212	46.6164	-0.786141	0.0169478
Scrn2	87.2026	96.8209	67.8517	48.7431	30.1455	70.4003	-0.752644	0.0170033
2810001G20Rik	29.0675	32.603	36.5355	13.3805	15.0727	22.8325	-0.935475	0.0170373
Gm10175	45.6776	44.4586	51.1497	21.9822	11.0533	39.0056	-0.966885	0.0172286
Klhl35	4.15251	2.96391	6.26323	0	1.00485	0	-3.67883	0.0172593
Gm31077	25.9532	49.3984	48.0181	8.60173	23.1115	27.5893	-1.05866	0.0173304
Dnmt3l	16.61	17.7834	13.5703	5.73448	9.04365	3.80542	-1.37543	0.0177087
Gm8775	31.1438	23.7113	20.8774	9.55747	6.0291	18.0757	-1.16404	0.0177272
Slc25a29	35.2963	37.5428	37.5794	20.0707	23.1115	19.0271	-0.829338	0.0177307
Prg4	10.3813	8.89172	11.4826	1.91149	2.0097	4.75677	-1.81888	0.0177411
Gm2518	73.707	81.0134	79.3342	56.3891	54.2619	45.665	-0.583168	0.0178182
Ispd	97.5839	108.677	115.87	49.6989	62.3007	96.0869	-0.62961	0.0182326
Slc5a5	20.7625	29.6391	20.8774	11.469	15.0727	5.70813	-1.15098	0.0182448
Mir28b	3.11438	2.96391	7.3071	0	0	0.951355	-3.67938	0.0183902
Naprt	11.4194	11.8556	31.3161	11.469	4.0194	1.90271	-1.64596	0.0184677
Snord100	9.34314	5.92781	4.17549	1.91149	1.00485	0	-2.73914	0.0186439
Scarna10	2.07625	2.96391	4.17549	0	0	0	-4.10479	0.0190245
Gm10029	44.6394	40.5067	30.2723	22.9379	16.0776	24.7352	-0.854222	0.0190757
Inmt	8.30501	8.89172	13.5703	4.77874	2.0097	1.90271	-1.81851	0.0192084
Gm38444	8.30501	1.97594	7.3071	0	1.00485	0.951355	-3.17318	0.0196208
Slc16a4	11.4194	11.8556	24.009	2.86724	4.0194	9.51355	-1.52186	0.0197799
Tigd3	39.4488	39.5188	48.0181	25.8052	30.1455	16.173	-0.818387	0.0201537
LOC108168114	34.2582	50.3864	56.3691	28.6724	29.1406	24.7352	-0.773544	0.020186
LOC102635893	3.11438	1.97594	8.35097	0.955747	0	0	-3.68412	0.0203667
Gpr15	8.30501	18.7714	8.35097	1.91149	3.01455	5.70813	-1.73753	0.0203939
Gm40531	50.8682	37.5428	51.1497	31.5397	22.1067	28.5406	-0.760413	0.0204768
Gm39874	6.22876	0	9.39484	0	0	0.951355	-3.90057	0.0207748
Rpl7	26609.3	24155.8	25674	11884.7	13444.9	22257.9	-0.683722	0.0210756
Gm40814	2.07625	4.93984	2.08774	0	0	0	-4.09128	0.0211562
Mrpl23-ps1	28.0294	6.91578	11.4826	4.77874	6.0291	4.75677	-1.57567	0.0212514
Gm9575	55.0207	47.4225	60.5446	24.8494	43.2085	30.4434	-0.728591	0.0212576
Cyp2u1	44.6394	61.2541	62.6323	38.2299	22.1067	39.9569	-0.746155	0.0216857
Rgs14	9.34314	13.8316	11.4826	1.91149	7.03395	1.90271	-1.69047	0.021981
LOC108167535	7.26689	7.90375	5.21936	1.91149	0	1.90271	-2.40265	0.0224298
Snord52	19.7244	30.627	28.1845	4.77874	10.0485	19.9785	-1.17302	0.0224438
Rpl17	7200.45	9124.88	4878.01	2965.68	2006.69	5132.56	-1.06922	0.022468
Gm15610	70.5926	70.1458	49.062	35.3627	35.1697	48.5191	-0.67259	0.022828
LOC108167812	7.26689	7.90375	4.17549	0	0	2.85406	-2.74321	0.0228534
Gm17094	69.5545	63.23	88.7291	37.2741	48.2328	57.0813	-0.634474	0.0229339
Rpph1	17.6482	4.93984	5.21936	0	4.0194	1.90271	-2.24304	0.023331
Gm36338	8.30501	2.96391	10.4387	0	1.00485	2.85406	-2.48299	0.0235253
LOC108167694	19.7244	25.6872	31.3161	4.77874	12.0582	18.0757	-1.13573	0.0235725
Bbof1	25.9532	25.6872	26.0968	9.55747	15.0727	15.2217	-0.965322	0.0236245
Gm28071	6.22876	2.96391	3.13161	0	1.00485	0	-3.56114	0.0236784
Katnal2	47.7538	54.3383	37.5794	27.7167	22.1067	33.2974	-0.747937	0.0239447
Gm7729	26.9913	21.7353	26.0968	3.82299	6.0291	20.9298	-1.27629	0.0240726
St6galnac2	21.8007	6.91578	14.6142	7.64598	5.02425	1.90271	-1.57007	0.024342
Ldha	31176	30862.2	27890.2	6812.57	7025.91	21547.2	-1.3456	0.0245644
LOC108167606	2.07625	3.95188	6.26323	0.955747	0	0	-3.55832	0.0248452
Gm8990	14.5338	21.7353	13.5703	4.77874	5.02425	10.4649	-1.29673	0.0249614
LOC108167600	2.07625	9.87969	5.21936	1.91149	0	0	-3.15604	0.0250499
Tmem190	37.3726	37.5428	37.5794	26.7609	24.1164	9.51355	-0.899711	0.0256275
B230344G16Rik	10.3813	5.92781	9.39484	1.91149	1.00485	3.80542	-1.92352	0.0258168
Gm26515	7.26689	9.87969	13.5703	3.82299	2.0097	3.80542	-1.66606	0.0263377
LOC108167604	19.7244	1.97594	8.35097	0.955747	2.0097	3.80542	-2.14415	0.0265469
Gm6729	6.22876	3.95188	5.21936	0	1.00485	0.951355	-2.9843	0.0266291
Gm7774	11.4194	12.8436	11.4826	5.73448	5.02425	1.90271	-1.50129	0.0267057
Tulp1	236.693	135.352	197.292	162.477	130.63	66.5948	-0.662275	0.0267141
Snord53	4.15251	9.87969	4.17549	0	2.0097	0.951355	-2.64203	0.0267196
LOC108167676	4.15251	10.8677	11.4826	0.955747	4.0194	1.90271	-1.95843	0.02683
Atp6v1g2	32.1819	42.4827	22.9652	14.3362	16.0776	21.8812	-0.901956	0.0270994
Slc39a5	23.8769	20.7473	35.4916	14.3362	18.0873	3.80542	-1.14864	0.0272845
1700092M07Rik	7.26689	7.90375	4.17549	0.955747	2.0097	0.951355	-2.31563	0.0273159
Polg2	55.0207	57.3022	61.5884	48.7431	26.1261	33.2974	-0.682615	0.0275157
Pkm	45535.3	45039.5	42104.6	21433.6	20176.4	38925.6	-0.720242	0.0276398
Acyp2	38.4107	35.5669	53.2374	19.1149	16.0776	35.2001	-0.849583	0.0279101
Aqp8	31.1438	28.6511	30.2723	18.1592	20.097	10.4649	-0.889078	0.0279751
Krtap1-5	17.6482	5.92781	11.4826	0.955747	1.00485	7.61084	-1.86107	0.0283193
Rpl18-ps2	25.9532	17.7834	28.1845	15.292	10.0485	10.4649	-1.00241	0.028399
Ccnb2	854.378	1059.1	974.976	297.237	351.697	800.09	-0.995124	0.0284916
Iqgap3	3075.97	3467.77	3387.36	1511.04	1349.51	2854.06	-0.797257	0.0287274
Trp63	6.22876	13.8316	4.17549	1.91149	3.01455	0.951355	-2.05748	0.0288632
Gm6983	15.5719	12.8436	17.7458	7.64598	4.0194	7.61084	-1.25332	0.0290563
Gm4833	102.775	90.8931	63.6762	49.6989	72.3492	45.665	-0.620292	0.0293202
LOC108168707	20.7625	4.93984	14.6142	2.86724	8.0388	1.90271	-1.66129	0.0294584
Gm30874	23.8769	8.89172	29.2284	6.69023	14.0679	0.951355	-1.52001	0.0296296
Gm11539	22.8388	28.6511	6.26323	5.73448	12.0582	3.80542	-1.42828	0.0298861
Setd4	130.804	105.713	133.616	70.7253	51.2473	117.968	-0.622929	0.0304695
Acat1	1838.52	2053.99	1751.62	929.942	945.564	1712.44	-0.653537	0.0307246
Pet117	41.5251	30.627	27.1407	13.3805	10.0485	27.5893	-0.956218	0.0307676
Tnk2os	21.8007	46.4345	25.0529	10.5132	24.1164	11.4163	-1.02642	0.0313146
Gm40755	37.3726	59.2781	33.4039	32.4954	13.063	25.6866	-0.866693	0.0313492
Gm7085	3.11438	4.93984	3.13161	0	1.00485	0	-3.42525	0.0315651
1700120C14Rik	10.3813	7.90375	4.17549	0	4.0194	0.951355	-2.19779	0.0324781
Gm21977	10.3813	1.97594	18.7897	0.955747	2.0097	4.75677	-2.00424	0.0325059
Gm36279	40.4869	27.6631	44.8865	12.4247	32.1552	16.173	-0.899277	0.0330561
Gm8797	18.6863	13.8316	16.7019	7.64598	7.03395	7.61084	-1.14071	0.0333455
LOC102639505	28.0294	24.6992	53.2374	14.3362	17.0824	24.7352	-0.91311	0.0335884
LOC102638940	37.3726	66.1939	55.3252	23.8937	25.1212	44.7137	-0.760981	0.034205
Sh3tc2	10.3813	17.7834	12.5265	3.82299	9.04365	2.85406	-1.38382	0.0342579
Pcdhb9	5.19063	0.987969	2.08774	0	0	0	-3.94521	0.0348444
LOC108169168	40.4869	48.4105	50.1058	12.4247	15.0727	44.7137	-0.942088	0.0349324
4921531C22Rik	44.6394	32.603	38.6232	21.0264	22.1067	26.6379	-0.729835	0.0350506
Kdm8	62.2876	60.2661	72.0271	26.7609	53.257	44.7137	-0.643234	0.0351122
LOC108168071	26.9913	12.8436	20.8774	13.3805	1.00485	9.51355	-1.33532	0.0354139
4833447I15Rik	15.5719	34.5789	16.7019	9.55747	12.0582	10.4649	-1.06454	0.035447
9430060I03Rik	13.4956	34.5789	20.8774	10.5132	15.0727	6.65948	-1.10388	0.0356841
Gm30698	20.7625	20.7473	9.39484	6.69023	6.0291	9.51355	-1.19458	0.0359674
Rpl36a-ps1	26.9913	14.8195	19.8336	11.469	8.0388	10.4649	-1.03585	0.0361375
Gm14391	63.3257	89.9052	105.431	44.9201	65.3152	62.7894	-0.581056	0.0361824
Adgrl3	142.223	164.003	157.625	42.0529	69.3346	161.73	-0.76342	0.0363948
A430090L17Rik	8.30501	1.97594	8.35097	0	3.01455	0	-2.65591	0.0364651
Gm15927	47.7538	50.3864	34.4478	24.8494	28.1358	29.492	-0.686315	0.0366371
Gm40476	2.07625	4.93984	1.04387	0	0	0	-3.91664	0.0367545
LOC108167712	2.07625	4.93984	1.04387	0	0	0	-3.91664	0.0367545
Prm1	2.07625	4.93984	1.04387	0	0	0	-3.91664	0.0367545
Rnu73b	25.9532	26.6752	44.8865	16.2477	16.0776	21.8812	-0.844303	0.0369338
Slc46a1	58.1351	65.2059	68.8955	34.4069	33.16	57.0813	-0.623137	0.0377987
Gm6344	11.4194	9.87969	33.4039	7.64598	9.04365	5.70813	-1.28754	0.0385045
Gm5453	14.5338	10.8677	8.35097	2.86724	4.0194	5.70813	-1.4211	0.0388285
Lrrc73	18.6863	37.5428	20.8774	13.3805	10.0485	16.173	-0.961878	0.0389188
AA465934	12.4575	11.8556	5.21936	2.86724	5.02425	1.90271	-1.60196	0.039583
LOC102637532	4.15251	1.97594	8.35097	0	1.00485	0.951355	-2.89221	0.0396315
LOC108167355	4.15251	1.97594	8.35097	0	1.00485	0.951355	-2.89221	0.0396315
Rnr2	14228.6	15184.1	12921	11079	11201.1	5616.8	-0.601714	0.0402465
Zfp934	78.8976	118.556	80.3781	48.7431	35.1697	88.476	-0.687406	0.0403146
Cfap43	48.7919	62.242	53.2374	39.1856	38.1843	31.3947	-0.596607	0.0404681
2900076A07Rik	52.9445	57.3022	48.0181	26.7609	41.1988	35.2001	-0.620072	0.0405631
Sumf2	36.3344	42.4827	43.8426	25.8052	33.16	11.4163	-0.80541	0.0410657
Smim5	17.6482	6.91578	21.9213	6.69023	6.0291	6.65948	-1.25741	0.0411418
Gm8483	45.6776	47.4225	49.062	23.8937	12.0582	43.7623	-0.83042	0.0414566
Snord70	15.5719	18.7714	20.8774	4.77874	12.0582	9.51355	-1.07172	0.0414662
Pfkl	1238.49	1568.89	1293.36	540.953	568.745	1220.59	-0.815314	0.0414853
Mir6516	37.3726	29.6391	27.1407	20.0707	13.063	20.9298	-0.796922	0.0416742
Dnd1	32.1819	32.603	35.4916	21.9822	23.1115	14.2703	-0.758168	0.0418664
2210008F06Rik	22.8388	11.8556	21.9213	5.73448	7.03395	13.319	-1.11255	0.0423687
Chchd10	33.2201	38.5308	45.9303	27.7167	23.1115	21.8812	-0.693979	0.0427947
Snora62	4.15251	1.97594	4.17549	0	0	0.951355	-3.30149	0.0429821
Trim65	14.5338	38.5308	15.6581	6.69023	11.0533	14.2703	-1.10607	0.043078
Gm15784	37.3726	41.4947	33.4039	22.9379	30.1455	12.3676	-0.783178	0.043149
Gm38676	5.19063	2.96391	2.08774	0	1.00485	0	-3.29523	0.044159
Gm5559	6744.71	6055.26	6276.8	2788.87	2477.96	5633.92	-0.807366	0.0441663
Osr2	15.5719	28.6511	33.4039	13.3805	17.0824	10.4649	-0.926772	0.0442178
Cabp1	43.6013	42.4827	52.1936	39.1856	21.1018	25.6866	-0.682622	0.0442811
Snord99	8.30501	7.90375	7.3071	4.77874	1.00485	0.951355	-1.79692	0.0444831
Tmem254c	0	19.7594	2.08774	0.955747	0	1.90271	-2.9261	0.0449047
Gm10651	35.2963	40.5067	61.5884	20.0707	29.1406	34.2488	-0.718412	0.045341
C130046K22Rik	44.6394	33.5909	44.8865	18.1592	35.1697	20.9298	-0.73211	0.0454368
Fam186b	7.26689	18.7714	16.7019	7.64598	7.03395	2.85406	-1.29032	0.0458186
Bglap3	5.19063	10.8677	1.04387	1.91149	0	0.951355	-2.5691	0.045924
Syt8	10.3813	4.93984	2.08774	0	0	2.85406	-2.59085	0.046104
Ces2e	8.30501	5.92781	3.13161	0.955747	1.00485	1.90271	-2.1646	0.0461403
Gm40864	2.07625	1.97594	3.13161	0	0	0	-3.74468	0.0465326
Gm8005	4.15251	5.92781	3.13161	0.955747	1.00485	0	-2.76642	0.046591
Gm5500	39.4488	48.4105	27.1407	11.469	15.0727	35.2001	-0.896269	0.0467154
9330151L19Rik	79.9357	112.628	91.8607	44.9201	45.2182	94.1841	-0.624909	0.0470207
Hist1h2af	21.8007	1.97594	12.5265	3.82299	6.0291	0	-1.88731	0.0470729
Gm5835	47.7538	45.4466	37.5794	22.9379	16.0776	39.0056	-0.74198	0.0472007
LOC102636313	11.4194	16.7955	16.7019	4.77874	0	11.4163	-1.46163	0.0472355
Gm30624	2.07625	2.96391	2.08774	0	0	0	-3.73612	0.0472769
LOC102640327	2.07625	2.96391	2.08774	0	0	0	-3.73612	0.0472769
Gm34140	7.26689	2.96391	3.13161	0.955747	0	0.951355	-2.78844	0.0475086
Pi16	36.3344	32.603	35.4916	6.69023	27.1309	22.8325	-0.885285	0.0479808
Gm6210	4.15251	9.87969	2.08774	0.955747	0	1.90271	-2.48415	0.0483356
Grap2	8.30501	12.8436	7.3071	2.86724	1.00485	5.70813	-1.56334	0.0486633
Hspa8	8299.82	9326.43	8389.6	4311.38	4286.69	8028.48	-0.645889	0.0489527
Gm550	24.915	25.6872	26.0968	22.9379	9.04365	7.61084	-0.951367	0.0494844
Mir18	3.11438	0.987969	3.13161	0	0	0	-3.75251	0.0496094
9630013D21Rik	43.6013	52.3623	61.5884	36.3184	13.063	42.811	-0.769027	0.0497522
