# Supplementary material for: Lysosome-mediated mitochondrial apoptosis induced by tea polysaccharides promotes colon cancer cell death
Source: Royal Society of Chemistry journal article supplement (doi:10.1039/d1fo00987g), 2021-01-01
Supplement: d1fo00987g2.xlsx [file d1fo00987g2.xlsx]

## Sheet: Sheet1
gene	NC-1	NC-2	NC-3	C800-1	C800-2	C800-3	log2(Fold_change)	p-value
Nfkbiz	862.683	806.183	843.448	4854.24	4372.1	5160.15	2.5179	6.74294e-178
Pdpn	634.295	613.529	611.709	2256.52	2461.88	2400.27	1.93664	6.70003e-125
Nr1d1	368.535	385.308	341.346	1968.84	1803.71	2152.92	2.43545	5.28357e-122
Cxcl1	68.5164	67.1819	54.2813	4707.06	3695.84	6460.65	6.28937	7.41206e-110
Serpinb9b	507.644	488.057	433.207	1812.1	1805.72	1895.1	1.94769	3.04724e-100
Rai14	3310.59	2995.52	3160.84	8192.67	8541.22	8554.58	1.4176	6.79428e-87
Tgfbr3	766.137	904.979	777.684	2666.54	2960.29	2924.47	1.80351	4.91443e-83
Il1rl1	2568.33	2029.29	2058.51	10537.1	12155.7	9486.91	2.27344	6.45302e-80
Plat	430.823	430.754	385.189	1404.95	1416.84	1355.68	1.74401	1.45793e-78
Sox9	234.617	256.872	235.915	966.261	1035	1160.65	2.1195	4.79765e-73
Ndrg1	11752.6	9632.7	10355.2	35561.4	33874.5	33663.7	1.69967	1.3189e-69
Bcl2l11	234.617	238.1	238.003	870.686	915.418	848.609	1.89007	5.0716e-69
Crebrf	362.306	355.669	365.355	2081.62	2279	1525.02	2.44163	2.62354e-67
Txnip	5618.34	6610.5	6691.22	33995.9	31201.6	47138.7	2.56983	5.8943e-66
Ptgs2	18111.2	17278.6	17514.1	57536	56891.6	69260.5	1.79582	2.69407e-64
Pim1	166.1	207.473	203.555	1214.75	1233.96	904.739	2.53801	9.24568e-64
Ier3	859.569	1078.86	932.177	4053.32	4014.38	5490.27	2.23952	1.07923e-63
Pnrc1	226.312	229.209	193.116	847.748	844.074	808.652	1.94596	1.95129e-63
Hist1h1c	74.7451	105.713	103.343	615.501	554.677	659.289	2.68755	7.74575e-63
Ccl20	9.34314	18.7714	18.7897	626.97	558.697	357.709	5.03721	1e-62
Plscr2	1200.07	1155.92	1089.8	2723.88	2646.77	2696.14	1.22713	1.12966e-60
Osbpl8	1728.48	1570.87	1615.91	3648.09	3718.95	3806.37	1.18488	1.40108e-59
Fnip2	698.659	747.892	776.64	2132.27	2242.83	1927.45	1.50313	1.70529e-59
Nrp2	6160.24	6388.21	5965.73	12999.1	13159.5	13515.9	1.09954	3.24484e-59
Dtna	481.691	472.249	480.181	1317.98	1302.29	1232.96	1.42593	5.65165e-58
Gm15441	525.292	613.529	567.866	2847.17	2894.97	4563.65	2.59409	1.39544e-57
Cxcl5	15.5719	16.7955	5.21936	328.777	299.445	385.299	4.74578	8.27071e-57
Fgfr1	1422.23	1330.79	1351.81	3605.08	3697.85	3174.67	1.3519	5.97795e-56
Cast	4117.21	3990.41	3954.19	7999.61	8369.4	8094.13	1.02015	1.70315e-55
Ccdc186	1404.59	1372.29	1434.28	3204.62	3188.39	2948.25	1.14945	6.09734e-54
Plekho1	460.928	490.033	433.207	1272.1	1198.79	1290.99	1.44208	3.1107e-52
Blnk	863.721	858.545	816.308	1906.72	2004.68	1870.36	1.18725	8.14837e-51
Csrnp1	484.805	484.105	504.19	1410.68	1390.71	1225.35	1.45074	3.48971e-50
Zfpm2	1873.82	1759.57	1856	7019.01	6691.3	5036.47	1.77194	6.68504e-50
Lamc2	869.95	782.471	786.035	1875.18	1931.32	2055.88	1.26573	7.02553e-49
Slc12a2	2821.63	2840.41	2683.79	6098.62	6350.65	5635.83	1.11557	2.13731e-48
Glrp1	1315.31	1319.93	1357.03	2767.84	2752.28	2996.77	1.09324	2.75237e-48
Dnase1l1	212.816	217.353	222.345	720.634	667.22	681.17	1.66504	1.18383e-47
Abcb1a	1378.63	1508.63	1440.54	2968.55	3101.97	2969.18	1.06239	3.06569e-47
Plekhh2	4123.44	3799.73	3958.36	8232.81	8680.9	7920.03	1.0636	5.05386e-47
2810474O19Rik	2103.24	2120.18	1955.17	4223.45	4143	4473.27	1.05521	3.71378e-46
Pik3c2a	1699.41	1733.89	1684.81	4125.01	4233.43	3579	1.22168	7.4117e-46
Fam214a	89.2789	89.9052	76.2026	389.945	441.129	401.472	2.26974	1.82521e-45
Zc3h12a	118.346	162.027	150.318	659.466	559.701	636.456	2.10635	2.23388e-45
Lims2	170.253	124.484	155.537	754.085	685.308	1050.3	2.46842	4.77193e-42
Cd68	48.7919	55.3263	62.6323	314.441	377.824	454.748	2.78241	8.14372e-42
Zeb1	856.454	819.026	838.229	1781.51	1756.48	1685.8	1.05538	1.66288e-41
Arid5b	958.191	946.474	958.274	1857.02	1911.22	1908.42	0.987566	8.88251e-41
Plekhn1	278.218	280.583	305.854	1048.45	1019.92	808.652	1.73442	1.00899e-40
Gdnf	87.2026	91.8811	74.1149	399.502	388.877	355.807	2.17465	3.08804e-40
Plscr1	1064.08	984.017	1091.89	2199.17	2125.26	2119.62	1.03755	5.40145e-40
Hecw2	57.097	48.4105	59.5007	519.927	564.726	319.655	3.09007	6.27005e-40
Klhl24	211.778	238.1	195.204	646.085	701.385	654.532	1.63264	9.48912e-40
Med10	2143.73	1955.19	1923.86	4946.95	4405.26	4214.5	1.17163	1.01788e-39
Rap1b	4350.79	4329.28	3791.34	9201.94	8856.75	8488.94	1.0899	1.56298e-39
Tes	3008.49	2418.55	2457.27	6817.35	6629	6148.61	1.31351	2.1717e-39
Per1	755.756	895.1	889.379	2462.01	2383.5	1997.85	1.42951	2.41647e-39
Calcoco1	434.975	430.754	472.874	1469.94	1393.73	1122.6	1.57439	6.08705e-39
Bdkrb2	1081.73	1176.67	1202.54	2440.98	2307.14	2319.4	1.03002	6.54725e-39
Wdr45	1054.74	1071.95	1049.09	2065.37	2074.01	1994.99	0.949678	1.02388e-38
Kdm3a	963.381	978.089	1007.34	1886.65	1943.38	1938.86	0.968174	1.08926e-38
Fer1l6	1784.54	1662.75	1678.55	3376.66	3964.13	3877.72	1.13002	1.38755e-38
Anxa7	1863.44	1811.93	1789.2	4419.38	4422.34	3668.42	1.19486	1.90714e-38
Tob1	364.382	361.597	321.512	874.509	864.171	883.809	1.32369	6.32746e-38
Abca5	852.302	858.545	905.037	2279.46	2418.67	1888.44	1.33213	1.21248e-36
Lpin2	636.372	708.374	678.517	1449.87	1447.99	1387.08	1.08222	2.72317e-36
Myo6	385.145	345.789	392.496	873.553	958.627	932.328	1.29958	1.45032e-35
Thbs2	4062.19	3531	3557.51	12304.3	12224	8855.21	1.582	3.35442e-35
Tecpr1	826.349	823.966	847.624	1758.58	1905.2	1642.99	1.08694	4.88155e-35
C1s1	402.793	406.055	474.962	1164.1	1338.46	1062.66	1.4736	1.28864e-34
Usp17la	67.4782	75.0856	65.7639	361.273	362.751	284.455	2.27392	1.94676e-34
Zfp292	708.002	729.121	705.657	1684.98	1632.88	1428.94	1.14726	4.15029e-34
Zfp655	1599.75	1610.39	1549.11	2809.9	2885.93	3034.82	0.875313	5.55699e-34
Ankrd12	778.595	741.965	839.273	1881.87	1797.68	1605.89	1.16356	6.39753e-34
Mpzl1	665.439	755.796	714.008	1452.74	1472.11	1468.89	1.04066	8.17577e-34
Eno2	1703.57	1451.33	1606.52	3369.97	3267.77	3807.32	1.13364	1.30799e-33
Dap	1629.86	1917.65	1678.55	3466.5	3493.86	3650.35	1.02147	1.58986e-33
Cebpd	267.837	298.367	292.284	872.597	902.355	1252.93	1.81845	1.76673e-33
Wbscr27	97.5839	98.7969	108.563	359.361	424.047	366.272	1.91454	2.51593e-33
Dynap	171.291	149.183	149.274	458.759	505.44	493.753	1.63423	3.0857e-33
Rabgap1l	912.513	973.149	981.239	1923.92	2052.91	1819.94	1.01552	3.44237e-33
Ahnak2	775.481	769.628	675.385	1529.2	1537.42	1515.51	1.04484	1.71778e-32
Ifi203	4858.43	3973.61	4414.53	21375.3	22789	12665.4	2.10104	2.63087e-32
Rictor	1205.26	1178.65	1160.79	2400.84	2271.97	2134.84	0.94148	2.8869e-32
Bhlhe40	572.008	562.154	559.515	1379.14	1379.66	1816.14	1.43378	6.30296e-32
Ttc39c	209.702	216.365	242.178	769.377	635.065	920.912	1.79962	7.96915e-32
Il4ra	228.388	220.317	204.599	660.421	623.007	840.046	1.70081	1.37747e-31
Wbp2	801.434	912.883	810.044	2081.62	2000.66	1713.39	1.19866	1.98914e-31
Klf6	5473	5208.57	5004.32	9485.79	9960.07	10877.8	0.950985	3.5503e-31
Tanc2	306.247	292.439	291.24	1174.61	1174.67	783.916	1.81573	4.63937e-31
Fam45a	847.111	872.376	797.518	1643.89	1816.77	1625.87	1.01455	6.06056e-31
Skil	1399.39	1633.11	1465.6	2823.28	3025.6	2992.01	0.974555	6.45699e-31
Kdm5a	2236.12	2165.63	2033.46	4318.07	4282.67	3814.93	0.948017	1.01881e-30
Sh3bgrl2	711.117	714.301	697.306	1511.99	1532.4	1339.51	1.04607	1.06557e-30
Foxo3	1015.29	1054.16	992.722	1894.29	1820.79	1881.78	0.869948	1.37899e-30
Cttnbp2nl	1899.77	1959.14	1858.09	3282.99	3229.59	3412.51	0.795768	1.5225e-30
Mroh1	1795.96	1851.45	1869.57	3389.08	3483.81	3135.67	0.859177	1.61176e-30
Plk3	1516.7	1633.11	1573.11	2733.44	2749.27	2785.57	0.807758	1.78555e-30
Tnfrsf23	828.425	741.965	759.938	2005.16	1965.49	1587.81	1.25418	2.25741e-30
Oser1	367.497	360.609	405.022	1713.66	1567.57	1014.14	1.92253	4.31918e-30
Atf2	1437.81	1436.51	1353.9	3528.62	3496.88	2751.32	1.20919	4.42206e-30
Bnip3l	1136.75	1219.15	1053.27	2286.15	2488.01	2820.77	1.15543	4.56768e-30
Ints12	702.812	724.181	754.719	1601.83	1710.25	1414.66	1.11521	6.16734e-30
Lpin1	357.116	404.079	376.838	1093.38	1119.4	862.879	1.43378	8.55395e-30
Vps37a	1363.06	1306.09	1369.56	2417.09	2298.09	2418.34	0.820958	1.09601e-29
Lysmd3	536.711	540.419	550.12	1897.16	1851.94	1264.35	1.62325	1.39203e-29
Pja2	3370.8	3075.55	3239.13	5593.99	5471.41	5797.56	0.800093	2.93519e-29
Fam114a1	275.104	302.318	288.109	799.961	666.216	721.127	1.33744	3.89291e-29
Nos2	2.07625	6.91578	4.17549	130.937	174.844	163.633	5.14324	3.92871e-29
Tgfb1	641.562	574.998	599.182	1339.96	1285.2	1180.63	1.06786	5.99892e-29
Pi4k2b	1493.86	1425.64	1348.68	2511.7	2500.07	2586.73	0.832096	1.18349e-28
Psmd8	3679.12	3499.39	3171.28	12025.2	10307.8	7758.3	1.53972	2.63426e-28
Cpd	2389.77	2569.71	2490.68	4446.14	4260.56	4133.64	0.785254	2.66414e-28
Ubald1	250.189	225.257	234.871	665.2	605.925	566.056	1.37137	2.89219e-28
Traf1	287.561	294.415	270.363	1040.81	741.579	791.527	1.5945	3.38102e-28
Gpnmb	4360.13	4126.75	4460.46	10052.6	10446.4	8115.06	1.14407	3.80137e-28
B4galt1	1171.01	1264.6	1184.79	2894	2745.25	2277.54	1.12858	3.83477e-28
Zfp941	36.3344	37.5428	43.8426	194.017	202.98	208.347	2.36318	3.97129e-28
Actn1	3819.27	3847.15	3682.78	7268.46	6721.44	6379.79	0.843808	4.06954e-28
Cops2	3553.51	3537.92	3387.36	5649.42	5680.42	5772.82	0.706719	4.49248e-28
Gap43	60.2113	54.3383	66.8078	337.379	288.392	237.839	2.2527	9.54415e-28
Rras	825.311	884.232	788.123	1695.5	1597.71	1904.61	1.05723	1.72402e-27
Tpm4	8885.33	8828.49	8879.17	14835.1	14077.9	14874.4	0.719496	1.79608e-27
Tubgcp2	1119.1	1258.67	1088.76	2353.05	2116.21	2319.4	0.969427	2.25788e-27
Adam8	238.769	231.185	230.696	542.865	558.697	591.743	1.27323	3.88635e-27
Prr13	1277.93	1110.48	1170.18	2492.59	2334.27	2922.56	1.12307	4.0715e-27
Hmox1	1299.73	1047.25	1297.53	2731.53	2652.8	2435.47	1.10175	4.41788e-27
Mef2a	3425.82	3100.25	3117	6394.91	6225.05	5560.67	0.914857	4.69638e-27
Mgea5	6193.46	6032.54	5895.79	10071.7	10527.8	9742.83	0.743574	5.65376e-27
Sik2	1142.98	1257.68	1255.78	2180.06	2373.46	2540.12	0.955995	5.65613e-27
Trim23	415.251	450.514	399.803	901.27	859.147	900.933	1.07197	6.54409e-27
Zfp9	300.019	308.246	328.82	1503.39	1356.55	822.922	1.97452	1.46489e-26
Il11	151.566	95.833	113.782	562.935	457.207	422.402	1.9993	1.63245e-26
Nppb	124.575	80.0255	119.001	410.016	427.061	583.181	2.13594	2.90968e-26
Ctsd	4432.8	4522.92	4304.93	8227.07	7650.93	7261.69	0.803187	3.99796e-26
Kpna3	1471.03	1664.73	1417.58	3456.94	3226.57	2833.14	1.06328	4.45534e-26
Tbrg1	2302.56	2179.46	2152.46	9936.91	8428.68	5229.6	1.83043	8.18249e-26
Slc44a2	951.962	1064.04	928.002	2347.32	2348.33	1869.41	1.15667	9.31159e-26
Tmod3	2634.77	2807.81	2475.02	4964.15	5094.59	4504.67	0.879034	1.1409e-25
Avl9	951.962	934.618	922.782	1664.91	1588.67	1709.58	0.821165	1.15906e-25
Maml2	514.911	592.781	616.928	1143.07	1220.89	1297.65	1.0861	1.17024e-25
Oas3	1392.13	1194.45	1511.53	4399.31	4652.46	3017.7	1.55841	1.3059e-25
Npat	779.633	843.725	830.922	1548.31	1583.64	1436.55	0.896125	1.55868e-25
Tax1bp1	3374.95	3315.62	3172.33	6553.56	6786.76	5602.53	0.941499	1.73343e-25
Cpeb2	432.899	431.742	469.742	876.42	1059.11	1040.78	1.15738	3.04854e-25
Ece1	1289.35	1332.77	1270.39	2840.48	2886.93	2302.28	1.04446	3.62571e-25
Mttp	427.708	346.777	358.048	923.252	890.297	813.408	1.21423	3.73309e-25
Jmjd1c	2590.13	2501.54	2548.09	4099.2	4050.55	3980.47	0.667056	4.70157e-25
Tiparp	5137.69	5590.92	5205.79	8981.16	10388.1	10533.4	0.908072	5.5257e-25
Nbr1	1474.14	1695.35	1542.84	4645.89	4593.17	3179.43	1.39782	6.03266e-25
Ctnna1	7506.69	7955.12	7371.82	16278.3	16286.6	13356.1	1.00795	6.28239e-25
Elf1	926.009	846.689	839.273	1754.75	1839.88	1556.42	0.979647	8.64799e-25
Pvr	5166.76	4524.9	4676.54	9154.15	9043.65	8170.24	0.875943	9.74291e-25
Vash2	63.3257	85.9533	72.0271	252.317	301.455	285.406	1.9208	9.74508e-25
Msn	1122.21	967.221	1103.37	1946.86	2003.67	2186.21	0.943042	1.01987e-24
Zfand2a	1215.65	1140.12	1203.58	3748.44	3347.16	2414.54	1.41787	1.15732e-24
Marcksl1	249.15	256.872	259.924	865.907	814.933	588.889	1.56699	2.67268e-24
Cpne3	970.648	1264.6	1174.36	2413.26	2564.38	2256.61	1.08489	5.74219e-24
Zdhhc20	1535.39	1579.76	1557.46	3469.36	3517.98	2732.29	1.05655	7.29923e-24
Chmp2a	1261.32	1215.2	1153.48	2048.17	2019.75	2059.68	0.755341	8.69243e-24
Fam134b	1272.74	1229.03	1211.93	3264.83	3528.03	2386	1.30535	9.62178e-24
Krt18	403.831	380.368	381.013	1044.63	1002.84	785.819	1.2818	1.34732e-23
Ugcg	1307	1223.11	1258.91	2076.84	2126.26	2076.81	0.72902	1.51199e-23
Ptbp2	1450.26	1272.5	1270.39	2313.86	2344.31	2408.83	0.823723	1.92212e-23
Ptbp3	2965.93	2833.49	2844.55	4856.15	4895.63	4476.13	0.71894	2.07103e-23
Ndst4	1904.96	1662.75	1622.18	5858.73	5873.35	3640.84	1.56659	2.11968e-23
Snx30	438.089	429.766	388.32	1526.33	1542.44	943.744	1.67521	2.14737e-23
Filip1l	2445.83	2452.14	2484.41	5086.49	5157.89	7104.72	1.23276	2.24487e-23
C3	19.7244	15.8075	38.6232	1795.85	1880.07	684.976	5.87944	2.25841e-23
Snap29	314.552	368.512	339.258	862.084	911.399	710.662	1.28015	2.50024e-23
Zfp36	145.338	214.389	176.414	581.094	553.672	480.434	1.58959	2.71753e-23
Tet2	614.571	538.443	544.901	1082.86	1072.17	1090.25	0.934897	2.84956e-23
Mpp5	600.037	597.721	615.884	1261.59	1271.14	1075.98	0.99247	3.92989e-23
Malat1	10674	10162.2	12093.3	19785.9	20076.9	20398	0.871872	4.29499e-23
Gm10509	63.3257	82.0014	72.0271	239.893	269.3	253.06	1.80842	8.00714e-23
Stk17b	1020.48	933.63	911.3	1703.14	1675.08	1635.38	0.80718	9.63886e-23
Sgms2	2667.99	2750.51	2543.92	5174.42	5787.94	4551.28	0.96212	9.6577e-23
Arl5b	956.115	1042.31	956.186	1656.31	1769.54	1714.34	0.798454	1.00938e-22
Xpo1	5484.42	5743.06	5585.76	9039.46	8932.11	8514.63	0.655597	1.11388e-22
Ypel5	705.926	566.106	685.824	1695.5	1633.89	1299.55	1.24173	1.28065e-22
Rb1cc1	1509.44	1563.95	1598.17	2469.65	2575.43	2493.5	0.690315	1.55553e-22
Ccr1	30.1057	23.7113	33.4039	141.451	190.921	239.741	2.71601	1.64643e-22
Gadd45g	495.186	474.225	453.04	1924.88	1581.63	1068.37	1.68529	1.66041e-22
Aim2	1351.64	1228.05	1294.4	2232.63	2391.54	2136.74	0.803398	1.7078e-22
Ptp4a1	1102.49	1040.33	1201.5	2102.64	1952.42	2301.33	0.926893	1.8079e-22
Emp1	18638.5	18199.4	17407.6	31772.9	29678.2	33142.4	0.802244	1.92816e-22
Prnd	12.4575	11.8556	6.26323	164.389	122.592	97.0382	3.64742	2.07658e-22
Chd9	867.874	844.713	911.3	1481.41	1500.24	1491.72	0.769861	2.59747e-22
Fbxl20	231.502	248.968	256.792	518.015	579.798	596.5	1.20029	2.95445e-22
Aloxe3	5.19063	6.91578	8.35097	180.636	225.086	78.0111	4.56294	3.14023e-22
Lrrc8d	1290.39	1203.35	1160.79	2043.39	2043.86	2033.05	0.743944	3.41931e-22
Rnh1	3665.62	3662.4	3382.14	6320.36	5967.8	5668.17	0.74546	3.60193e-22
Fbxo33	292.752	304.294	266.187	703.43	628.031	606.964	1.16667	3.67741e-22
Kitl	2291.15	2104.37	1882.1	3866.95	4073.66	3666.52	0.886632	3.9084e-22
Slk	6935.72	6538.38	6507.5	10415.7	10550.9	11153.7	0.684842	3.93788e-22
Car13	486.881	444.586	474.962	1268.28	1283.19	924.717	1.30546	4.19517e-22
Rusc2	815.967	952.402	869.545	1531.11	1694.18	1711.49	0.903758	5.49201e-22
Herc4	880.331	786.423	793.342	1540.66	1476.12	1415.62	0.849553	5.7237e-22
Hmga2	6100.03	4951.7	5338.36	12220.2	12031.1	9941.66	1.0609	6.27669e-22
Gtf2b	583.427	573.022	605.446	1736.59	1649.96	1156.85	1.3666	6.34271e-22
Xbp1	1893.54	1592.61	1763.1	5602.59	5280.49	3496.23	1.45385	6.39703e-22
Wipi1	504.53	614.517	599.182	1120.14	1110.36	1156.85	0.978928	7.77816e-22
Hbp1	717.345	756.784	753.675	1299.82	1438.95	1289.09	0.854046	8.29576e-22
Spats2l	7.26689	9.87969	10.4387	172.035	176.854	80.8652	3.96	1.0165e-21
Tmem50a	865.798	843.725	796.474	1575.07	1742.41	1446.06	0.926344	1.05756e-21
Kdm7a	596.923	478.177	516.716	1180.35	1323.39	1054.1	1.16047	1.13007e-21
Cav2	4011.32	4121.81	3619.1	6730.37	6486.31	6392.15	0.738488	1.33893e-21
Mier3	679.973	733.073	703.569	1685.94	1668.05	1278.62	1.12979	1.36969e-21
Psap	8126.45	8518.27	8309.22	13460.7	13627.8	15281.6	0.763781	1.38394e-21
Rasa3	3531.71	3714.76	3563.78	5896.01	5620.13	5481.71	0.652896	2.248e-21
Mnda	482.729	352.705	468.698	1633.37	1714.27	1012.24	1.7415	2.29555e-21
Utp11l	949.886	926.715	896.686	1907.67	1870.03	1556.42	0.94351	2.99831e-21
Abca8b	66.4401	71.1338	89.773	317.308	316.528	232.131	1.92979	3.63888e-21
Rab9	359.192	391.236	429.031	1056.1	1040.02	787.722	1.28974	3.70285e-21
Sun2	3872.21	3549.77	3654.59	6228.61	5780.9	5847.03	0.689031	3.84842e-21
Zfp955a	534.635	504.852	509.409	1080.95	1124.43	922.814	1.01394	4.10343e-21
Rab5a	1284.16	1393.04	1311.1	3253.36	3185.37	2356.51	1.14079	4.4851e-21
Naaa	363.344	304.294	312.118	863.996	899.341	673.559	1.31459	4.59234e-21
Mfge8	3242.07	3289.94	3279.84	5671.4	5341.78	4989.86	0.705731	4.82862e-21
H3f3b	18292.8	16964.4	17092.4	31071.3	31425.7	37095.2	0.927867	5.9015e-21
Lrig1	4804.45	4460.68	4251.69	7248.39	7207.79	7360.63	0.690698	7.43546e-21
Ptprj	316.629	337.885	326.732	771.288	760.671	629.797	1.13908	7.51375e-21
Trim6	170.253	145.231	179.546	506.546	410.984	418.596	1.43373	8.26748e-21
Sh3glb1	5753.3	5464.46	5573.23	10517	10329.9	8836.18	0.821949	8.76867e-21
Fnip1	1655.81	1507.64	1473.95	3238.07	3402.42	2637.16	1.00037	9.16819e-21
Kdm6a	618.723	626.372	617.972	1427.89	1441.96	1104.52	1.09282	1.22788e-20
Slc11a2	1263.4	1281.4	1415.49	3616.55	3257.72	2429.76	1.23226	1.23691e-20
Scamp1	880.331	829.894	915.475	1962.15	1909.21	1518.36	1.03756	1.46291e-20
9930021J03Rik	905.246	858.545	878.94	1834.08	1752.46	1476.5	0.937967	1.5925e-20
Napb	966.496	716.277	903.993	1807.32	1889.12	1703.88	1.06232	1.68758e-20
Tnfaip8	355.039	355.669	319.425	670.935	686.313	690.684	0.990975	1.82954e-20
Dync1i2	2781.14	2809.78	2737.03	5418.13	5398.05	4420.95	0.871484	1.83423e-20
Dtl	997.64	1017.61	857.019	1680.2	1714.27	1743.83	0.8388	2.05107e-20
Ubxn4	2565.21	2326.67	2321.57	3899.45	4134.96	3801.61	0.714416	3.14349e-20
Ppp1r2	1632.97	1556.05	1532.4	2806.07	2757.31	2451.64	0.763437	3.47885e-20
Gm7367	192.053	198.582	173.283	479.785	413.998	522.294	1.32834	3.49033e-20
Sqstm1	17142.6	15675.1	16257.3	27133.7	25817.6	27125	0.70641	3.59788e-20
Ptgs2os	100.698	84.9653	106.475	290.547	266.285	300.628	1.55519	4.81975e-20
Stam2	1242.64	1166.79	1168.09	2471.56	2542.27	1984.53	0.967971	5.35587e-20
Stx7	1015.29	984.017	981.239	1706.01	1834.86	1594.47	0.784707	5.3777e-20
Glul	930.161	1137.15	889.379	1909.58	1875.05	1885.59	0.938918	5.50462e-20
Stk38l	282.37	357.645	316.293	740.704	777.754	648.824	1.17936	5.6226e-20
Ostm1	742.261	671.819	724.447	1275.92	1303.29	1193.95	0.819348	5.82872e-20
Tfrc	1507.36	1562.97	1495.87	3304.97	3038.67	2519.19	0.956675	6.4088e-20
Litaf	1674.5	1539.26	1627.4	4795.94	4259.56	2987.25	1.31476	7.00329e-20
Gcnt2	670.63	640.204	686.867	1442.22	1471.1	1153.04	1.02536	7.24626e-20
Cobll1	1377.59	1361.42	1348.68	2574.78	2403.6	3202.26	1.00106	8.10975e-20
Ifi202b	3806.81	3201.02	3408.24	8902.79	10275.6	6553.88	1.30476	8.19516e-20
Gabpb1	635.333	618.468	656.595	1177.48	1150.55	1062.66	0.827817	8.45025e-20
Pea15a	1935.07	2084.61	2023.02	5434.38	5242.3	3601.83	1.2405	9.0921e-20
Hip1r	420.441	474.225	378.925	922.296	855.127	832.436	1.03437	9.81003e-20
Asah1	2784.26	2603.3	2756.86	5766.02	5667.35	4448.54	0.963501	1.12375e-19
Pou6f1	176.482	188.702	207.73	422.44	466.25	527.051	1.30542	1.20643e-19
Gabarapl1	2257.93	1880.1	1957.26	6318.45	6078.34	3888.19	1.41779	1.25841e-19
Gadd45b	368.535	348.753	357.004	1350.47	1180.7	756.327	1.61357	1.33245e-19
Creb5	942.619	952.402	1024.04	1666.82	1817.77	2110.11	0.938705	1.52681e-19
Dram2	722.536	662.927	694.175	1156.45	1314.34	1354.73	0.879468	1.68374e-19
Cd47	3700.92	3533.96	3444.78	5901.74	5973.83	5356.13	0.690159	1.88304e-19
Ero1l	7701.86	7779.27	7764.32	12995.3	13301.2	16058.9	0.865613	3.1313e-19
Vps37b	1255.1	1071.95	1074.14	2278.5	2019.75	1969.3	0.882056	3.17793e-19
Plcxd2	237.731	220.317	216.081	792.315	777.754	489.948	1.61137	3.33719e-19
Orc6	1233.29	1227.06	1188.97	1939.21	1878.06	2046.36	0.684247	3.68597e-19
Slc41a2	285.485	277.619	245.31	562.935	659.182	563.202	1.14232	3.75354e-19
Nbeal1	1760.66	1642	1576.25	2796.52	2881.91	3406.8	0.867772	3.85125e-19
Vat1	5078.52	4849.94	4649.4	9503.95	8957.23	7705.98	0.84396	3.85846e-19
Stom	2134.39	1915.67	2051.21	5963.86	5608.07	3710.28	1.32468	3.98622e-19
Slc2a6	216.968	231.185	176.414	468.316	495.391	538.467	1.26526	4.77554e-19
Plxnd1	1080.69	1204.33	1186.88	2156.17	2032.81	1860.85	0.801004	5.04017e-19
Gng12	1351.64	1376.24	1341.37	2759.24	2700.03	2175.75	0.907737	5.39642e-19
Itpr3	3575.31	4192.94	3851.89	6440.78	6342.61	6264.67	0.712907	5.47855e-19
LOC108168731	306.247	238.1	274.538	597.342	576.784	605.062	1.12051	6.13967e-19
Zfp382	788.976	829.894	862.238	2151.39	2076.02	1470.79	1.19942	7.18534e-19
Orc4	1164.78	1236.94	1079.36	2262.25	2382.5	1915.08	0.913783	7.82996e-19
Cyp4v3	46.7157	48.4105	39.6671	181.592	155.752	216.909	2.0395	8.92959e-19
Efna1	105.889	126.46	121.089	604.032	481.323	310.142	1.98079	1.03794e-18
Igf2bp2	1686.96	1685.47	1692.12	4205.29	4129.93	2884.51	1.14747	1.08872e-18
Zfp948	1260.29	1325.85	1367.47	2307.17	2237.8	2792.23	0.892186	1.14339e-18
Tsc22d1	6142.59	5639.33	5685.97	8957.26	8968.29	8787.67	0.612876	1.22787e-18
Slc7a11	1637.13	1719.07	1525.1	2642.64	2960.29	2633.35	0.75442	1.28521e-18
Tbc1d15	1387.98	1397.98	1339.29	2992.45	2823.63	2243.29	0.966083	1.48682e-18
Eea1	6691.76	5877.43	5984.52	10238	10630.3	12167.8	0.832378	1.54195e-18
Itpk1	340.506	329.982	318.381	608.811	680.283	732.543	1.03163	1.65039e-18
Chd6	1505.28	1510.6	1560.59	2418.04	2700.03	2374.58	0.711104	1.65311e-18
Lnp	1153.36	1232	1086.67	2450.54	2410.64	1914.13	0.964239	1.68704e-18
Smyd3	286.523	286.511	265.143	533.307	584.823	587.937	1.02498	1.69415e-18
Ets1	3299.17	3269.19	3214.08	5695.3	4886.59	5715.74	0.736481	1.70801e-18
Hsd17b11	600.037	646.132	638.849	1108.67	1194.77	1416.57	0.980726	1.71078e-18
Numbl	437.051	424.827	431.119	900.314	793.831	772.5	0.932034	1.86895e-18
Stxbp3	1161.66	1114.43	1090.85	1912.45	2153.39	1800.91	0.800916	2.32754e-18
Top3a	270.951	322.078	310.03	929.942	879.244	609.819	1.42107	2.40106e-18
Il6	10.3813	13.8316	8.35097	157.698	136.66	72.303	3.48845	2.5806e-18
Herpud1	2966.97	2911.54	2947.89	5852.04	5537.73	4586.48	0.85601	2.87458e-18
Trim33	3595.03	3192.13	3316.38	5290.06	5299.58	5169.66	0.641422	3.02584e-18
Tnfrsf10b	968.572	917.823	865.37	2067.28	2132.29	1560.22	1.06549	3.17869e-18
Lcn2	330.124	152.147	299.591	5442.98	5552.8	2575.32	4.11772	3.28262e-18
Pfn2	714.231	861.509	764.114	1417.37	1444.97	1727.66	0.971843	3.34194e-18
Ppargc1a	110.041	122.508	140.923	349.804	300.45	338.682	1.40556	3.84922e-18
Zcchc11	394.488	396.175	350.741	989.199	1004.85	715.419	1.24675	4.28588e-18
Bcl3	22.8388	30.627	35.4916	133.805	154.747	130.336	2.23466	4.50177e-18
C1ra	415.251	371.476	444.689	1061.84	1110.36	777.257	1.26027	4.55452e-18
Smim14	1916.38	1836.63	1820.51	2855.77	3031.63	3356.38	0.729953	4.57353e-18
Atp7a	639.486	700.47	647.2	1353.34	1243	1108.33	0.898328	5.02316e-18
Klf10	472.348	687.626	600.226	2686.61	2502.08	4075.6	2.39585	5.29278e-18
Zfyve1	415.251	463.357	437.382	927.075	897.331	767.743	0.977528	5.55093e-18
Il13ra2	16.61	14.8195	22.9652	101.309	121.587	106.552	2.60116	5.57771e-18
Pou2f1	897.979	943.51	941.572	1703.14	1735.38	1460.33	0.81554	5.60274e-18
Pcdh10	16.61	18.7714	20.8774	111.822	101.49	108.454	2.51635	5.61844e-18
Btc	104.851	97.8089	103.343	274.299	283.368	388.153	1.62878	5.89784e-18
Zkscan5	306.247	322.078	321.512	607.855	610.949	592.694	0.931232	6.13725e-18
Anxa4	2031.61	1919.62	1987.53	3329.82	3386.34	2951.1	0.70293	6.96658e-18
Lnpep	1750.28	1802.06	1668.11	3159.7	3379.31	2713.26	0.825428	7.86313e-18
Snx1	1190.73	1294.24	1231.77	1900.98	1954.43	2010.21	0.658055	8.03582e-18
B2m	9511.32	8292.02	8872.91	21078.1	19999.5	15149.4	1.07571	9.22012e-18
Lrrc8c	1068.23	996.86	1001.07	1689.76	1707.24	1575.44	0.697519	9.28176e-18
Sord	534.635	671.819	559.515	1208.06	1206.82	1060.76	0.976092	9.36869e-18
Rell1	1831.26	1879.12	1868.53	3088.02	3066.8	2736.1	0.672246	1.02268e-17
Abi1	4978.86	4536.75	4752.75	8363.75	8233.74	7183.68	0.737017	1.13034e-17
Uba3	4441.11	4013.13	3882.16	6335.65	6621.96	6658.53	0.669135	1.14945e-17
Tmprss11f	7.26689	11.8556	11.4826	85.0615	86.4171	86.5733	3.07322	1.25916e-17
Bst2	2597.39	2347.41	2766.26	8582.61	8022.72	4770.09	1.47097	1.29855e-17
Rab11fip1	215.93	201.546	211.906	420.529	452.182	471.872	1.09548	1.51612e-17
Vps26a	1508.4	1488.87	1429.06	2822.32	2895.98	2296.57	0.856422	1.90624e-17
Arl1	1800.11	1670.66	1632.62	3391.95	3418.5	2690.43	0.896543	1.91879e-17
Haus6	1329.84	1468.12	1292.31	2414.22	2358.38	2125.33	0.753653	1.92433e-17
Spag9	3285.67	3158.54	3236	6275.44	6543.58	5024.11	0.88222	2.03358e-17
Snx2	1376.56	1314	1383.13	2036.7	2151.38	2081.56	0.622113	2.06522e-17
Nfkbie	341.544	401.115	316.293	703.43	694.351	768.695	1.03197	2.15627e-17
Zfp51	226.312	239.088	277.67	537.13	499.41	586.035	1.12737	2.16698e-17
Kcnab1	15.5719	20.7473	26.0968	107.044	129.626	109.406	2.4709	2.38645e-17
1810013L24Rik	1012.17	1229.03	1148.26	1885.69	2094.11	1948.37	0.806141	2.39006e-17
Insr	766.137	869.413	822.571	1495.74	1444.97	1315.72	0.791751	2.45001e-17
Bmpr2	1494.9	1587.67	1537.62	2289.97	2492.03	2579.12	0.671845	2.6713e-17
Ttc39b	2323.33	2183.41	2239.1	4094.42	4075.67	3395.39	0.777735	3.09569e-17
Sp3	3504.72	3495.43	3332.04	5321.6	5490.5	6319.85	0.729557	3.27928e-17
Plekhb2	1603.91	1691.4	1693.16	3895.63	3761.15	2724.68	1.05726	3.4146e-17
Fryl	1141.94	1390.07	1342.42	2557.58	2448.82	2133.89	0.881783	3.45454e-17
Rasal2	1731.6	1557.04	1529.27	2475.39	2615.62	2602.91	0.675354	3.50136e-17
Dusp4	2277.65	2477.83	2401.95	3670.07	3779.24	4258.26	0.709904	3.99802e-17
Kmt2c	1272.74	1221.13	1297.53	2378.86	2252.87	1944.57	0.794585	4.01427e-17
Zdhhc9	787.938	799.267	762.026	1280.7	1356.55	1231.05	0.719174	4.08617e-17
Sirt2	1313.23	1177.66	1274.57	2223.07	2315.17	1947.42	0.784477	4.32188e-17
Slc27a1	3642.79	3248.44	3382.14	5371.3	5122.73	5312.37	0.621719	4.32769e-17
Gm33302	205.549	190.678	179.546	543.82	462.231	401.472	1.28959	4.47093e-17
Mnt	748.489	638.228	725.491	1385.83	1429.9	1174.92	0.918063	4.68954e-17
Rasa2	588.618	559.19	532.374	983.464	984.753	927.571	0.785214	5.23233e-17
Pld3	396.564	426.803	437.382	744.527	799.861	743.96	0.859723	5.35985e-17
Wdfy1	894.865	881.268	830.922	1733.73	1626.85	1384.22	0.863779	5.53318e-17
Mdm2	3395.71	3254.37	3518.89	5474.52	5041.33	5058.35	0.615096	5.85713e-17
Oas1c	31.1438	31.615	51.1497	287.68	286.382	135.092	2.6394	6.65624e-17
Nfkbia	256.417	278.607	284.977	728.28	684.303	1276.72	1.71374	7.35776e-17
Slfn9	2543.41	2917.47	2808.01	7404.17	7348.47	4743.46	1.23735	7.63896e-17
Renbp	907.323	908.931	976.02	2041.48	1971.52	1512.65	0.984663	8.63813e-17
Eif3e	5368.15	5186.84	4952.13	8115.25	8391.5	7537.59	0.63272	8.74055e-17
Slc6a8	3079.08	2758.41	2897.79	5956.22	5636.2	4565.55	0.88734	9.07362e-17
Gabarap	2322.29	2199.22	2196.31	4404.08	4219.36	3435.34	0.843994	9.47824e-17
Itga6	4956.02	5070.26	4889.49	7169.06	7674.04	8123.62	0.622683	1.12851e-16
D930015E06Rik	372.687	419.887	443.645	763.642	767.705	749.668	0.883627	1.14375e-16
Npc1	1676.57	1593.59	1631.57	3188.37	3162.26	2510.63	0.854175	1.16711e-16
Wdr47	541.902	543.383	511.497	1008.31	996.811	868.587	0.847434	1.18695e-16
Zfp955b	503.491	490.033	496.883	1223.36	1103.33	860.025	1.09631	1.20601e-16
Zc3h6	269.913	297.379	337.171	779.89	747.608	1340.46	1.66519	1.21671e-16
Lrrfip1	3560.77	2967.86	3086.73	6469.45	6304.43	5170.61	0.900159	1.21702e-16
Fgfr1op	639.486	640.204	621.104	1273.06	1258.07	1021.76	0.902153	1.27393e-16
Zc3h12c	542.94	523.623	532.374	1101.02	1087.25	878.101	0.939298	1.29793e-16
Gnb5	421.479	383.332	451.996	758.863	819.958	755.376	0.893547	1.34803e-16
Lmbrd1	1326.73	1102.57	1291.27	3293.51	3242.65	2155.77	1.22422	1.38142e-16
AI607873	84.0883	62.242	72.0271	1319.89	1317.36	494.705	3.84254	1.61351e-16
Srpk2	1473.1	1549.14	1572.07	2501.19	2809.56	2345.09	0.736513	1.7742e-16
Zbtb11	783.786	858.545	782.904	1460.38	1466.08	1269.11	0.790308	1.80332e-16
Gaa	2256.89	2210.09	2272.51	4660.22	4741.89	3503.84	0.937276	2.10847e-16
Mxi1	675.82	764.688	686.867	1160.28	1180.7	1225.35	0.744948	2.28012e-16
Impact	2164.49	1915.67	2068.95	3619.42	3663.68	3102.37	0.756164	2.43995e-16
Cul4b	1578.99	1679.55	1517.79	2596.77	2477.96	2381.24	0.642292	2.75523e-16
Clip4	18.6863	18.7714	20.8774	93.6632	111.538	175.049	2.70555	2.81265e-16
Fas	28.0294	18.7714	20.8774	100.353	118.572	158.876	2.48322	2.81969e-16
Cd9	2932.71	3161.5	3150.4	4500.61	4677.58	4972.73	0.614184	3.17461e-16
Igf2r	1188.65	1148.02	1187.93	3107.13	3046.71	1971.21	1.20486	3.24203e-16
Psme1	1136.75	1287.32	1232.81	2600.59	2474.95	1946.47	0.94108	3.33608e-16
Atp6ap2	1645.43	1644.97	1604.43	3549.65	3328.06	2562	0.94741	3.35304e-16
Prkar1b	277.18	295.403	270.363	530.44	565.731	527.051	0.944658	3.63629e-16
Qser1	1543.69	1583.71	1731.78	2481.12	2511.12	2476.38	0.620208	4.00004e-16
Itga5	2771.8	3001.45	2888.39	5389.46	4970.99	4341.98	0.763273	4.0489e-16
Klra2	203.473	168.943	189.985	558.156	553.672	382.445	1.41001	4.25802e-16
Gab2	366.459	399.139	372.662	718.722	674.254	668.803	0.856737	4.26919e-16
Cpeb4	878.255	833.846	900.861	1703.14	1739.4	1367.1	0.880213	5.5074e-16
Capg	3841.07	4313.47	3681.74	6522.02	6217.01	7284.52	0.758429	5.74064e-16
Tbc1d23	634.295	656.999	600.226	1247.25	1255.06	1013.19	0.893787	6.26358e-16
Emilin2	240.845	239.088	251.573	480.741	495.391	613.624	1.12029	6.3339e-16
Itgav	2958.66	3285.98	3036.62	4981.36	4877.54	4521.79	0.631601	6.62037e-16
Cep85l	110.041	126.46	134.659	323.043	307.484	280.65	1.29548	6.78593e-16
Slpi	7.26689	7.90375	9.39484	72.6368	71.3443	75.157	3.15821	7.34861e-16
Vps29	1345.41	1250.77	1192.1	2042.43	1989.6	1918.88	0.651565	7.54705e-16
Rnf13	2531.99	2264.42	2373.76	3705.43	4022.41	3573.29	0.656398	8.58207e-16
Als2	589.656	689.602	667.034	1559.78	1577.61	1103.57	1.12335	9.38795e-16
Upp1	187.901	169.931	158.668	495.077	466.25	929.474	1.87248	9.6671e-16
Mcmbp	1345.41	1498.75	1388.35	2463.92	2411.64	2114.86	0.723606	1.01e-15
Mpp1	1375.52	1453.3	1264.13	2156.17	2187.56	2090.13	0.652224	1.11349e-15
Usp53	1137.79	1161.85	1174.36	1821.65	1784.61	2093.93	0.714568	1.12067e-15
Map3k8	20.7625	27.6631	28.1845	110.867	174.844	114.163	2.38187	1.13721e-15
Atf7ip	1501.13	1674.61	1610.69	2414.22	2474.95	2386	0.603803	1.55899e-15
Cmip	1428.46	1380.19	1473.95	3544.87	3329.07	2310.84	1.10074	1.66073e-15
Pak1	426.67	429.766	343.434	830.544	855.127	719.224	1.00244	1.70807e-15
Tbx15	624.952	681.698	581.436	1155.5	1178.69	1018.9	0.827959	1.99885e-15
Fbxw17	569.931	539.431	512.541	1187.04	1171.66	891.42	1.0026	2.32694e-15
Rlim	2598.43	2774.22	2835.16	3923.34	4350	4260.17	0.610649	2.34631e-15
Ccne2	431.861	446.562	377.882	799.961	721.482	781.062	0.873771	2.36655e-15
Gorab	463.004	474.225	437.382	832.456	781.773	764.889	0.791176	2.41766e-15
Zfand5	1175.16	1020.57	1016.73	1819.74	1891.13	1668.68	0.743817	2.43909e-15
1810011O10Rik	411.098	501.888	444.689	852.527	963.651	1254.84	1.17734	2.45332e-15
Iqcb1	251.227	300.343	274.538	537.13	568.745	711.614	1.13726	3.28857e-15
Ube2b	1560.3	1372.29	1367.47	2701.9	2559.35	2200.48	0.795185	3.30261e-15
Far1	2162.42	1945.31	1888.36	3160.66	3146.19	2986.3	0.632165	3.41336e-15
Rsbn1l	412.136	376.416	395.627	685.271	693.346	688.781	0.804252	3.4255e-15
Ghr	727.727	862.497	764.114	1546.4	1604.75	2435.47	1.2466	3.5596e-15
Rnf2	1318.42	1260.65	1232.81	2272.77	2214.69	1880.83	0.740319	3.83315e-15
Plk2	12898.7	11109.7	11549.4	21897.1	22231.3	30907.6	1.07743	4.02906e-15
Zufsp	169.215	196.606	225.476	476.918	446.153	404.326	1.16672	4.17694e-15
Zswim4	1302.85	1193.47	1249.51	2336.8	1978.55	1959.79	0.744578	4.38476e-15
Zfp24	659.21	789.387	677.473	1247.25	1235.97	1163.51	0.777805	4.53876e-15
Nub1	1157.51	1321.9	1311.1	3188.37	3088.91	2066.34	1.13815	5.32959e-15
Micu1	1506.32	1568.89	1511.53	3983.56	4047.54	2487.79	1.19734	5.50467e-15
Timp3	9.34314	11.8556	6.26323	91.7517	57.2764	107.503	3.21989	6.23378e-15
Dgka	41.5251	42.4827	40.711	175.858	150.727	126.53	1.86086	6.47036e-15
Scyl2	2359.66	2180.45	2193.17	3762.78	3936	3269.81	0.703946	6.62418e-15
Cxcl10	474.424	377.404	410.242	4523.55	3794.31	1850.39	3.01025	6.68564e-15
H2-T22	558.512	574.998	600.226	1954.5	1771.55	1018.9	1.45243	6.75016e-15
Zfp758	89.2789	80.0255	94.9923	215.999	246.188	226.422	1.38218	8.12739e-15
Exoc2	785.862	851.629	860.15	1262.54	1410.81	1361.39	0.691663	8.28883e-15
Pak2	2470.74	2460.04	2483.37	4190.95	4126.92	3515.26	0.674424	8.52037e-15
Ube2j1	1704.6	1704.25	1740.13	3412.02	3498.89	2585.78	0.883051	9.13702e-15
Klhl28	157.795	194.63	149.274	387.078	392.896	353.904	1.17479	9.51394e-15
Ccng2	275.104	438.658	383.101	777.023	865.176	1012.24	1.27444	9.89743e-15
Slc16a6	193.092	248.968	213.994	478.829	514.483	429.061	1.11512	1.01803e-14
Mvp	1101.45	1035.39	1104.42	2213.51	2138.32	1653.45	0.889674	1.06089e-14
A830080D01Rik	713.193	685.65	687.911	1061.84	1117.39	1120.7	0.661193	1.06868e-14
Gm32219	28.0294	37.5428	29.2284	120.424	164.795	117.017	2.08168	1.11984e-14
Diaph3	2094.94	2214.04	2126.37	3194.11	3054.74	3423.93	0.58793	1.14265e-14
Ube2d1	434.975	427.79	429.031	870.686	854.122	697.343	0.906724	1.18743e-14
Ppp2r5b	1314.27	1219.15	1229.68	2423.78	2311.15	1883.68	0.814584	1.21276e-14
Pcnp	1413.93	1437.49	1380	2286.15	2270.96	2011.16	0.634198	1.46769e-14
Mef2d	1637.13	1551.11	1755.79	2850.99	2781.42	2425	0.704723	1.53911e-14
Vps8	458.852	457.43	450.953	777.023	755.647	746.814	0.73743	1.57627e-14
Maml3	273.027	364.56	341.346	668.067	644.109	628.846	0.986887	1.65018e-14
Btf3l4	565.779	517.696	533.418	852.527	925.467	919.96	0.738772	1.65555e-14
Cript	542.94	675.771	593.963	1231	1158.59	1002.73	0.903616	1.73964e-14
Inpp5f	561.626	549.311	529.243	888.845	903.36	1038.88	0.787634	2.01405e-14
Mrpl10	743.299	824.954	753.675	1432.67	1304.3	1199.66	0.76134	2.06972e-14
Zfp30	83.0501	88.9172	88.7291	230.335	248.198	202.639	1.3849	2.11037e-14
Emsy	916.666	989.945	912.344	1474.72	1468.09	1404.2	0.624513	2.11983e-14
Iqgap1	10409.3	9861.9	9915.74	15722	16102.7	14223.7	0.60922	2.12824e-14
Ptges	1808.42	1947.29	1908.2	3285.86	2788.46	2900.68	0.664143	2.14394e-14
Tmem106a	247.074	270.703	263.056	1113.45	912.404	504.218	1.6959	2.14816e-14
Slc25a36	1429.5	1358.46	1434.28	2009.94	2118.22	2189.07	0.581425	2.20863e-14
A230046K03Rik	1720.18	1629.16	1672.28	3030.67	3207.48	2468.77	0.793933	2.21649e-14
Itgb7	6933.65	6619.39	6816.48	10411.9	10894.6	9518.31	0.597665	2.23084e-14
Tmem41b	614.571	620.444	572.042	1278.79	1211.85	955.16	0.930929	2.44345e-14
Fgf7	2988.77	2504.5	2651.43	5348.36	5011.19	7985.67	1.17156	2.71828e-14
Uba6	1344.37	1392.05	1293.36	2024.27	2107.17	1934.1	0.589646	2.82275e-14
Tmem55b	635.333	756.784	638.849	1310.33	1289.22	1088.35	0.860043	3.00312e-14
Yipf4	1108.72	1110.48	1099.2	1710.79	1695.18	1582.1	0.587894	3.16746e-14
Stoml1	550.207	548.323	572.042	955.747	892.307	880.003	0.707722	3.44347e-14
Gba	581.351	582.902	583.524	1057.06	1061.12	892.371	0.784288	3.47961e-14
Reep5	3715.46	3469.75	3453.13	6237.21	5460.35	5211.52	0.668567	4.56689e-14
Foxj3	1786.62	1711.16	1786.06	3603.17	3526.02	2628.59	0.884932	4.70379e-14
Atxn2	1593.52	1662.75	1623.22	3967.31	3463.72	2541.07	1.03111	5.00939e-14
AI467606	375.802	443.598	397.715	755.04	729.521	684.976	0.833262	5.11485e-14
Plag1	643.638	652.059	611.709	981.553	1026.96	1013.19	0.663473	5.25147e-14
Peli1	352.963	343.813	360.136	883.111	910.394	600.305	1.17927	5.30834e-14
Rnf11	2194.6	1826.75	1924.9	3762.78	3738.04	3017.7	0.822921	5.49864e-14
Eps8l2	1105.6	1266.58	1169.14	1931.57	1785.62	1807.57	0.641418	5.59868e-14
Baz2b	1011.14	988.957	1012.56	1464.2	1578.62	1496.48	0.591362	5.6173e-14
Dlgap5	1079.65	1232	1074.14	1900.98	1747.43	1746.69	0.671868	5.93245e-14
Oit3	19.7244	18.7714	16.7019	78.3713	95.4607	98.9409	2.30433	6.25986e-14
Cltc	10702	10705.6	10623.5	20329.7	20618.5	15801.1	0.82511	6.48387e-14
Gm15834	50.8682	41.4947	45.9303	136.672	148.718	153.168	1.66617	6.80734e-14
Agfg1	2818.51	2615.15	2820.54	5848.22	5985.89	4163.13	0.954606	7.73356e-14
Tmem106b	1264.44	1231.01	1198.36	1858.93	1792.65	2051.12	0.626686	8.91313e-14
Gm19619	34.2582	34.5789	41.7549	131.893	118.572	131.287	1.78879	1.04476e-13
Stk3	1053.7	1009.7	992.722	1520.59	1498.23	1647.75	0.610824	1.23201e-13
Maged1	8998.48	7733.82	8472.06	14015.1	13622.8	12344.8	0.66573	1.25787e-13
Tfg	1241.6	1162.84	1196.28	2822.32	2684.96	1848.48	1.03055	1.33172e-13
Wdyhv1	98.622	141.28	123.177	279.078	302.46	293.969	1.26829	1.43696e-13
Gnl2	1276.9	1192.48	1354.95	2393.19	2268.95	1889.39	0.776726	1.51237e-13
Tgfbr1	486.881	512.756	468.698	984.42	961.641	770.598	0.887216	1.52305e-13
Myom2	2.07625	1.97594	6.26323	80.2828	72.3492	41.8596	4.24602	1.532e-13
Atp6v1a	2229.9	2069.79	2130.54	4881	4822.27	3256.49	1.01107	1.581e-13
Bckdha	162.986	189.69	221.301	406.193	394.906	485.191	1.16463	1.60226e-13
Cdkl2	344.658	322.078	365.355	582.05	657.172	612.673	0.84364	1.60746e-13
Rlf	776.519	773.58	774.553	1151.68	1195.77	1297.65	0.649031	1.69914e-13
Prune2	3497.45	3292.9	3558.56	6243.9	6682.25	5028.86	0.794887	1.76522e-13
Aldh6a1	74.7451	64.218	54.2813	225.556	216.043	159.828	1.63745	1.77433e-13
Tab3	616.647	481.141	530.287	1003.53	1049.06	905.69	0.861893	1.96106e-13
Gm36551	7.26689	7.90375	8.35097	56.3891	59.2861	94.1841	3.15818	1.96785e-13
Tnfrsf9	104.851	113.616	92.9046	829.589	867.186	2269.93	3.67114	1.97828e-13
Cdkn2aip	678.935	688.614	606.489	1580.81	1337.46	1066.47	1.01315	1.98914e-13
Axdnd1	6.22876	3.95188	2.08774	91.7517	89.4316	37.1028	4.15207	2.04583e-13
Serpinb9e	4.15251	2.96391	3.13161	48.7431	50.2425	101.795	4.29548	2.10497e-13
Bbx	1319.46	1684.49	1670.19	2597.72	2912.06	2584.83	0.79204	2.10768e-13
Rbm43	225.273	192.654	219.213	629.838	670.235	392.91	1.40992	2.34122e-13
Zrsr1	331.162	242.052	292.284	689.094	632.051	532.759	1.09967	2.37608e-13
4833419F23Rik	3.11438	4.93984	4.17549	66.9023	57.2764	46.6164	3.79966	2.5432e-13
Fos	20.7625	33.5909	22.9652	97.4862	110.533	116.065	2.06331	2.61001e-13
Gm5486	19.7244	35.5669	13.5703	133.805	176.854	96.0869	2.55566	2.74687e-13
Golgb1	2223.67	2083.63	2096.09	4758.67	4373.11	3201.31	0.945606	2.93102e-13
Reck	135.995	126.46	164.932	312.529	350.693	303.482	1.17819	3.04314e-13
Trim30c	14.5338	12.8436	9.39484	167.256	186.902	46.6164	3.44471	3.16779e-13
Chaf1b	306.247	418.899	359.092	751.217	685.308	967.528	1.1485	3.23846e-13
Tmem176a	2403.26	2194.28	2274.6	4885.78	4719.78	3405.85	0.920933	3.36448e-13
Cystm1	175.443	155.111	179.546	368.918	458.212	335.828	1.18891	3.45741e-13
Trim12c	402.793	350.729	407.11	1202.33	1196.78	664.046	1.40015	3.802e-13
Fndc3a	1662.04	1473.06	1614.87	4143.16	4049.55	2468.77	1.16641	4.02391e-13
Ggt1	346.734	270.703	328.82	696.74	635.065	558.445	0.998996	4.03941e-13
Zfp367	1142.98	1376.24	1318.41	1931.57	2114.2	2085.37	0.675666	4.04544e-13
Eif3j1	798.319	923.751	844.492	1360.98	1522.35	1316.68	0.71	4.17596e-13
Gcc2	498.301	591.793	557.427	931.854	885.273	916.155	0.730011	4.72345e-13
Akt3	2024.35	2129.07	2195.26	3376.66	3844.56	3066.22	0.696214	4.77728e-13
Mcm4	1462.72	1894.92	1583.55	2866.29	2675.92	2716.12	0.740724	4.85116e-13
Kidins220	2390.81	2297.03	2380.03	4277.93	4492.68	3374.46	0.780969	5.22929e-13
Zfp850	205.549	211.425	199.379	545.732	515.488	366.272	1.2112	5.31879e-13
Klhl7	1026.71	868.425	920.695	1447	1485.17	1470.79	0.645195	6.10237e-13
Bnip3l-ps	79.9357	83.9773	88.7291	184.459	235.135	260.671	1.42898	6.45103e-13
Prn	20.7625	28.6511	8.35097	156.743	127.616	84.6706	2.66967	7.97577e-13
Ppp6c	1231.22	1168.77	1120.07	2523.17	2321.2	1752.4	0.906089	8.20862e-13
Ctif	552.283	599.697	549.076	1311.29	1201.8	889.517	0.999908	8.56018e-13
Fzd5	82.012	81.0134	70.9833	209.309	178.863	212.152	1.35927	8.64619e-13
Csrp1	2488.39	2205.15	2213.01	4191.91	4089.74	3321.18	0.748435	8.8396e-13
3110002H16Rik	669.592	628.348	641.981	1178.44	1063.13	974.187	0.729291	9.58516e-13
Aifm2	444.318	459.405	474.962	836.279	887.283	711.614	0.820418	9.60541e-13
Fsd1l	89.2789	94.845	126.308	242.76	251.212	273.039	1.30601	9.90214e-13
Chm	714.231	720.229	702.526	1068.53	1083.23	1205.37	0.651722	1.00365e-12
Tmem263	666.477	704.422	706.701	1195.64	1169.65	1016.05	0.702458	1.04856e-12
Zc3h7a	1974.52	1897.89	2057.47	3648.09	3554.15	2814.11	0.75628	1.09312e-12
Bag3	719.422	704.422	765.158	1579.85	1311.33	1135.92	0.8796	1.14262e-12
Gsto2	68.5164	49.3984	56.3691	164.389	159.771	228.325	1.66642	1.16153e-12
Tpp1	1990.09	1931.48	1982.31	3453.12	3607.41	2776.05	0.736416	1.18852e-12
Antxr2	5074.36	4373.74	4682.81	7905.94	8311.11	6783.16	0.702803	1.23783e-12
Ticam1	448.471	381.356	415.461	925.163	894.316	668.803	0.99879	1.33138e-12
Dennd1b	694.507	753.82	750.544	1328.49	1329.42	1079.79	0.765103	1.37151e-12
Cd164	2978.39	3177.31	3132.66	6427.4	6313.47	4503.71	0.89259	1.41001e-12
Cdkl3	55.0207	56.3142	60.5446	172.99	175.849	140.801	1.5101	1.43666e-12
Arhgap12	690.354	726.157	650.332	1020.74	1188.74	1165.41	0.706964	1.45223e-12
Trim34b	79.9357	84.9653	99.1678	288.636	316.528	188.368	1.5871	1.49684e-12
Pphln1	1729.52	1793.16	1748.48	2821.37	2813.58	2411.68	0.610112	1.56091e-12
Utrn	2056.53	2219.97	2371.68	4231.09	4325.88	3227.95	0.825847	1.58032e-12
Atp6v1b2	2616.08	2450.16	2459.36	3983.56	3883.75	3437.25	0.587015	1.61784e-12
9930111J21Rik1	303.133	233.161	286.021	904.137	823.977	489.948	1.43182	1.65299e-12
Laptm4b	914.59	874.352	889.379	2019.49	1991.61	1341.41	0.998797	1.70833e-12
Tmem176b	4349.75	3703.89	3966.71	10009.5	9874.66	6140.04	1.11438	1.71359e-12
H1fx	129.766	188.702	189.985	397.591	453.187	763.938	1.66699	1.79106e-12
Ubap1	974.801	984.017	940.528	1492.88	1510.29	1362.34	0.590175	1.86174e-12
Csf2	1.03813	1.97594	1.04387	80.2828	58.2813	52.3245	5.54546	2.02706e-12
Garnl3	309.362	273.667	302.723	624.103	602.91	487.094	0.952696	2.14869e-12
Zfp867	74.7451	121.52	74.1149	310.618	274.324	224.52	1.57944	2.1686e-12
Padi2	442.242	447.55	446.777	723.501	810.914	1002.73	0.924788	2.18553e-12
Kdm1a	1915.34	1903.82	1759.97	3278.21	3225.57	2617.18	0.709016	2.3604e-12
Xlr	646.753	670.831	682.692	1023.61	987.768	1092.16	0.633894	2.62603e-12
Rps26-ps1	113.156	153.135	126.308	694.828	746.604	1607.79	2.95713	2.66667e-12
5430425K12Rik	79.9357	92.8691	81.422	212.176	285.377	536.564	2.02404	2.78708e-12
Areg	895.903	717.265	777.684	1431.71	1429.9	2090.13	1.05073	2.83262e-12
Spidr	698.659	722.205	682.692	1045.59	1072.17	1194.9	0.655118	3.10303e-12
Parp3	449.509	391.236	432.163	687.182	718.468	707.808	0.731932	3.13869e-12
LOC102633469	15.5719	24.6992	20.8774	75.504	95.4607	105.6	2.17434	3.20539e-12
Apol7a	876.179	790.375	843.448	1307.46	1351.52	1212.03	0.625118	3.28623e-12
Copb1	2890.14	2718.89	2876.91	6983.65	6829.97	4215.45	1.08716	3.29573e-12
Ell2	373.726	293.427	357.004	683.359	672.245	577.472	0.91708	3.30082e-12
2610301B20Rik	383.069	396.175	422.768	664.244	649.133	753.473	0.782357	3.31174e-12
LOC108167347	82.012	104.725	103.343	432.954	480.318	198.833	1.93804	3.4286e-12
Wwc1	114.194	103.737	93.9484	246.583	293.416	504.218	1.74364	3.62611e-12
Gm2666	56.0588	41.4947	56.3691	318.264	273.319	121.773	2.2133	3.77714e-12
Atp6v1h	1530.2	1353.52	1411.31	3181.68	3044.7	2114.86	0.957585	4.02613e-12
Ikbip	1314.27	1239.9	1162.87	2048.17	2072	1755.25	0.660387	4.15581e-12
Plod2	853.34	795.315	743.237	1251.07	1180.7	1257.69	0.625376	4.49059e-12
Lamb3	45.6776	54.3383	38.6232	137.628	145.703	241.644	1.91989	4.53884e-12
Rab33b	425.632	439.646	370.574	832.456	878.239	656.435	0.936995	4.6585e-12
Ddx58	2510.19	2127.1	2494.85	6235.3	6386.83	3633.22	1.18852	4.66289e-12
Slc1a7	22.8388	9.87969	20.8774	84.1058	95.4607	80.8652	2.28646	5.08035e-12
Pygb	867.874	1309.06	1092.93	2353.05	2251.87	1855.14	0.981972	5.19703e-12
Bpifc	51.9063	30.627	41.7549	148.141	126.611	133.19	1.71788	5.22936e-12
Plin3	728.765	815.074	719.228	1343.78	1366.6	2096.79	1.0869	5.36085e-12
H2-T23	95.5076	89.9052	94.9923	285.768	229.106	198.833	1.34825	5.51618e-12
Alpk1	319.743	368.512	349.697	562.935	613.963	617.429	0.789155	5.59948e-12
Ano10	1217.72	1183.59	1132.6	1879.96	1850.93	1634.43	0.60226	5.8772e-12
Fam126b	406.946	421.863	387.276	652.775	681.288	653.581	0.708335	6.25657e-12
Cd300lb	386.183	348.753	395.627	664.244	667.22	599.354	0.772518	6.38869e-12
Bcar3	807.662	812.11	747.412	1408.77	1284.2	1150.19	0.698951	6.46371e-12
Med12	1714.99	1665.72	1859.14	2913.12	2928.13	2434.52	0.659387	6.7075e-12
Ppp2ca	4417.23	4302.6	4128.51	7801.77	7652.94	5972.61	0.737828	6.8633e-12
Trim34a	52.9445	49.3984	91.8607	226.512	217.048	179.806	1.68452	6.88419e-12
Ccl5	78.8976	52.3623	56.3691	817.164	584.823	293.017	3.17567	8.33867e-12
2700062C07Rik	474.424	462.369	427.987	723.501	746.604	723.03	0.684059	8.38232e-12
Adprh	713.193	650.083	656.595	1309.37	1167.64	1002.73	0.784789	8.6068e-12
Kifap3	972.725	1153.95	970.801	1679.25	1779.59	1540.24	0.690039	8.73025e-12
Aftph	2209.13	2215.03	2067.91	4161.32	4092.75	3050.04	0.800001	8.92585e-12
1810058I24Rik	438.089	375.428	461.391	761.731	717.463	946.598	0.92887	8.92799e-12
Mmp13	50.8682	55.3263	70.9833	250.406	272.314	135.092	1.89244	9.15913e-12
Anp32a	1139.86	1298.19	1199.41	1798.72	1865	2192.87	0.687032	9.65931e-12
Sdc4	2235.09	1805.02	1890.45	3502.81	3169.3	2972.03	0.701621	1.04619e-11
F3	771.328	692.566	702.526	1072.35	1200.8	1106.43	0.641487	1.06291e-11
Parp4	1129.48	1101.59	1125.29	2311.95	2430.73	1619.21	0.922441	1.06711e-11
Clk1	1032.94	1162.84	1168.09	1691.67	1817.77	2208.09	0.765283	1.07845e-11
Fstl3	589.656	434.706	488.532	1140.21	1074.18	825.776	1.00712	1.10918e-11
Pls3	2365.89	2427.44	2380.03	4424.15	4088.73	3318.33	0.721821	1.12517e-11
Acadl	1836.45	2001.62	1811.12	2839.53	2604.57	3018.65	0.583056	1.15176e-11
Cadm4	103.813	110.653	122.133	261.875	267.29	223.568	1.16095	1.15398e-11
Slf1	627.028	691.578	637.806	1049.41	963.651	1015.1	0.630052	1.17199e-11
Pold4	440.166	370.488	387.276	741.66	631.046	789.625	0.852791	1.28051e-11
Trmt10c	849.188	800.255	885.203	1334.22	1346.5	1202.51	0.615597	1.28202e-11
Pla2g15	297.942	340.849	335.083	648.952	561.711	541.321	0.847016	1.28283e-11
Irf9	1249.9	1066.02	1212.98	2915.99	2745.25	1760.96	1.07266	1.30204e-11
Nbl1	4.15251	2.96391	5.21936	41.0971	51.2473	52.3245	3.55741	1.32378e-11
Gla	385.145	362.585	397.715	1023.61	999.826	606.013	1.19879	1.34383e-11
Stx11	146.376	114.604	145.098	374.653	306.479	270.185	1.22935	1.38477e-11
Spryd7	437.051	447.55	389.364	786.58	780.768	655.484	0.802524	1.39105e-11
Igsf3	42.5632	41.4947	29.2284	150.052	147.713	101.795	1.81661	1.44741e-11
Asah2	275.104	276.631	269.319	454.936	482.328	483.288	0.790708	1.46914e-11
B3gnt2	651.943	758.76	691.043	1042.72	1149.55	1115.94	0.65391	1.47682e-11
Gm19589	62.2876	73.1097	85.5975	165.344	226.091	287.309	1.61911	1.49422e-11
Stil	770.29	810.134	767.246	1192.77	1124.43	1303.36	0.62505	1.63516e-11
Lamp2	4203.37	4076.36	3926	8653.34	8358.34	5803.27	0.902388	1.65419e-11
Gdi1	2794.64	2747.54	2832.02	5761.25	5306.61	3940.51	0.841723	1.74847e-11
Gm39150	20.7625	15.8075	24.009	99.3977	122.592	67.5462	2.25849	1.77933e-11
Hsdl2	99.6602	123.496	140.923	275.255	287.387	255.914	1.16857	1.78589e-11
Aff4	4463.94	4490.32	4527.27	7815.15	8040.81	6158.12	0.707398	1.79995e-11
Phf3	2826.82	2664.55	2857.08	4467.16	4541.92	3764.51	0.613578	1.90057e-11
Arhgef3	206.587	207.473	209.818	423.396	352.702	473.775	1.0031	1.91171e-11
Bach1	706.964	642.18	672.253	1092.42	1140.5	974.187	0.665906	2.02051e-11
Lrrfip2	1304.93	1288.31	1297.53	2181.97	2196.6	1776.18	0.661525	2.05252e-11
2310030G06Rik	78.8976	78.0495	74.1149	177.769	189.917	179.806	1.24411	2.25234e-11
Phf11a	39.4488	34.5789	41.7549	311.574	276.334	85.6219	2.54062	2.34934e-11
Atg10	69.5545	57.3022	46.9742	169.167	145.703	230.228	1.64951	2.41737e-11
Armc8	708.002	664.903	746.368	1219.53	1127.44	1029.37	0.672157	2.55276e-11
Serpinb9c	9.34314	11.8556	8.35097	54.4776	54.2619	79.9138	2.67195	2.55994e-11
Rab11a	1113.91	1242.86	1173.31	1872.31	1911.22	1634.43	0.617719	2.57105e-11
Ctsb	12092.1	11885.3	12315.6	19754.3	19629.7	16449.9	0.621446	2.63166e-11
Nt5c3	469.233	464.345	437.382	707.253	759.667	712.565	0.66843	2.75098e-11
Vwa5a	982.068	1062.07	995.853	1721.3	1861.99	1430.84	0.721578	2.84672e-11
Lipa	248.112	315.162	307.942	626.97	605.925	485.191	0.979103	2.90156e-11
Psmd4	2160.34	2214.04	2075.22	3801.96	3560.18	2945.39	0.676324	2.96817e-11
Dcp2	1347.49	1442.43	1440.54	3571.63	3354.19	2051.12	1.08533	3.31844e-11
Aida	2554.83	2382.98	2634.73	5350.27	5184.02	3579.95	0.898299	3.333e-11
Fpgt	548.131	627.36	589.787	940.455	880.249	938.036	0.64391	3.39368e-11
Sgtb	420.441	418.899	421.724	1119.18	1211.85	652.63	1.24221	3.50776e-11
Mtpn	7647.88	7414.71	6973.06	11706.9	11529.6	9948.32	0.590661	3.52365e-11
Srrm4	285.485	299.355	334.039	566.758	543.624	498.51	0.808259	4.04629e-11
Rnf24	760.947	869.413	778.728	1596.1	1599.72	1166.36	0.856192	4.04849e-11
Naga	491.034	517.696	603.358	973.907	984.753	821.971	0.786507	4.14207e-11
Antxr1	876.179	865.461	872.677	1344.74	1442.96	1212.98	0.613577	4.29828e-11
Serinc3	5495.84	4753.12	5299.74	9354.86	9452.62	7268.35	0.745932	4.62398e-11
Il1rap	187.901	206.485	194.16	449.201	476.299	330.12	1.09238	4.63573e-11
2610305D13Rik	888.636	793.339	868.501	1262.54	1249.03	1427.98	0.627717	4.68154e-11
Tcp11l2	43.6013	46.4345	51.1497	255.185	344.664	102.746	2.31457	4.7366e-11
Slc11a1	2.07625	3.95188	3.13161	52.5661	31.1503	61.8381	3.98631	4.86037e-11
Sgpl1	2303.6	2333.58	2367.5	4337.18	4064.62	3197.5	0.727602	4.91435e-11
Fndc3b	3624.1	3149.64	3246.44	7642.16	7414.79	4809.1	0.987388	4.97581e-11
Ccne1	657.134	737.025	670.166	1231	1080.21	1020.8	0.690468	5.06612e-11
Atp6v0d1	1223.95	1189.51	1368.52	2662.71	2518.15	1809.48	0.886237	5.12363e-11
S100a16	439.128	406.055	394.583	687.182	689.327	902.836	0.878881	5.22598e-11
Rasgef1b	25.9532	30.627	25.0529	127.114	140.679	74.2057	2.06441	5.61096e-11
Plcd1	472.348	421.863	443.645	712.032	697.366	708.759	0.663319	5.70944e-11
H2-T24	38.4107	41.4947	58.4568	122.336	176.854	140.801	1.66942	5.71477e-11
Fam8a1	857.493	858.545	839.273	1338.05	1384.68	1176.83	0.609547	5.82007e-11
Haus2	633.257	595.745	561.603	1142.12	1156.58	871.441	0.82386	5.84235e-11
Ssh1	846.073	961.294	928.002	1358.12	1495.22	1319.53	0.608865	6.2955e-11
Gm12059	14.5338	14.8195	20.8774	65.9466	74.3589	80.8652	2.14056	7.35457e-11
Fcho2	1033.97	1133.2	1138.86	1750.93	1832.85	1525.02	0.62762	7.41564e-11
Dopey2	370.611	402.103	354.916	634.616	680.283	584.132	0.751151	7.54154e-11
Btg1	5147.03	4555.52	4524.14	6923.43	7091.23	8531.75	0.664349	7.5576e-11
Ciao1	433.937	470.273	439.47	1003.53	931.496	673.559	0.956741	7.69562e-11
Atp6v0c	780.671	785.435	794.386	1826.43	1720.3	1135.92	0.988127	8.07563e-11
Slc8b1	285.485	353.693	345.521	593.519	564.726	554.64	0.798251	8.18214e-11
Dsn1	724.612	715.289	805.869	1093.38	1133.47	1139.72	0.584319	8.4436e-11
Helb	378.916	492.008	420.68	774.155	703.395	745.862	0.783035	9.10304e-11
Klf11	247.074	298.367	247.398	476.918	500.415	685.927	1.06858	9.22677e-11
Ppp3r1	2507.08	2533.15	2472.93	4042.81	4025.43	3319.28	0.599869	9.39791e-11
Sh3bp2	382.031	334.921	314.205	681.448	622.002	548.932	0.845146	9.53987e-11
Tnrc6b	1125.33	1362.41	1253.69	2030.96	2016.73	1777.13	0.638296	9.61558e-11
Atp6v0b	1518.78	1379.2	1380	2808.94	2683.95	1991.19	0.806858	9.67519e-11
Insig2	1124.29	1054.16	1017.77	1512.95	1617.81	1852.29	0.640749	9.69581e-11
Mastl	815.967	1047.25	932.177	1512.95	1476.12	1873.22	0.79844	9.90641e-11
Tmem179	19.7244	30.627	29.2284	137.628	133.645	73.2543	2.11207	1.01695e-10
Gm32720	12.4575	14.8195	15.6581	67.8581	82.3977	57.0813	2.27021	1.02865e-10
Ndfip1	4374.67	4181.08	4149.39	6624.29	6854.08	5622.51	0.588182	1.07324e-10
Cdkn2aipnl	1984.9	2053	1956.22	3724.55	3648.61	2723.73	0.752183	1.11401e-10
Syap1	790.014	769.628	749.5	1363.85	1375.64	1075.03	0.723934	1.14692e-10
Fn1	69681.1	63657.8	69724.4	110925	106559	102281	0.655088	1.17284e-10
Capza2	4933.18	4763.99	4938.56	8034.97	7827.78	6482.53	0.610465	1.18936e-10
Ralgds	158.833	179.81	155.537	308.706	311.503	388.153	1.02855	1.20804e-10
Hivep2	563.703	626.372	535.506	1005.45	962.646	847.657	0.705882	1.20889e-10
Ubqln2	872.026	847.677	811.088	1569.34	1334.44	1214.88	0.702592	1.23124e-10
AA467197	378.916	292.439	249.485	1540.66	1467.08	843.852	2.06442	1.2346e-10
Ptgs2os2	652.982	612.541	684.78	993.977	1045.04	941.841	0.612166	1.25746e-10
Zfp157	507.644	482.129	456.172	719.678	766.701	790.576	0.655025	1.25813e-10
Kdm5b	1171.01	1058.11	1105.46	1793.94	1957.45	1543.1	0.666902	1.26672e-10
Dhfr	1071.35	1104.55	1139.91	2440.98	2198.61	1564.98	0.90391	1.30854e-10
Mospd1	234.617	259.836	258.88	514.192	590.852	407.18	1.00462	1.33351e-10
Maoa	1140.9	1059.1	985.415	1490.97	1680.11	1617.3	0.587904	1.37093e-10
Oasl1	1531.24	1181.61	1462.46	10252.3	9442.58	4276.34	2.52137	1.37984e-10
Kansl1	1498.02	1417.74	1432.19	2473.47	2570.41	1965.5	0.688853	1.51014e-10
Kdelr3	264.722	302.318	279.758	590.652	554.677	445.234	0.908849	1.52894e-10
Six4	135.995	135.352	109.607	393.768	327.581	235.936	1.32874	1.54351e-10
9130208D14Rik	76.8214	50.3864	60.5446	305.839	286.382	130.336	1.94493	1.55621e-10
Rbm27	1840.6	1859.36	1933.25	3068.9	3008.52	2498.26	0.606239	1.55705e-10
Gm40525	2807.09	2654.67	3153.54	3971.13	4757.96	4696.84	0.640106	1.62615e-10
Il15	22.8388	21.7353	30.2723	200.707	158.766	62.7894	2.49699	1.62786e-10
Dgke	418.365	454.466	423.812	1084.77	1161.61	651.678	1.15994	1.65791e-10
Emc2	905.246	870.4	871.633	1700.27	1633.89	1228.2	0.785166	1.74737e-10
Gatad2b	1587.3	1763.52	1767.27	2941.79	3113.03	2341.28	0.713947	1.89772e-10
Dhx40	71.6307	55.3263	72.0271	169.167	189.917	149.363	1.35451	1.90893e-10
Pdcd10	1038.13	894.112	985.415	1783.42	1704.23	1367.1	0.734691	1.98178e-10
Ubxn7	1339.18	1288.31	1275.61	2203	2110.18	1752.4	0.63595	2.00458e-10
Rab31	2214.32	2058.93	2074.17	3933.86	3495.87	2899.73	0.70253	2.02299e-10
Rps6ka5	181.672	179.81	158.668	320.175	340.644	315.85	0.908269	2.03183e-10
Papd4	972.725	921.775	944.704	1950.68	1790.64	1326.19	0.835753	2.03657e-10
Katnbl1	848.149	783.459	760.982	1269.23	1147.54	1470.79	0.700605	2.25746e-10
P4ha2	343.62	421.863	355.96	647.041	597.886	729.689	0.815847	2.36054e-10
Vill	17.6482	7.90375	12.5265	52.5661	80.388	70.4003	2.42131	2.50503e-10
Irf7	758.871	655.023	900.861	3939.59	3347.16	1984.53	2.00197	2.60298e-10
Trafd1	357.116	419.887	378.925	1187.04	1052.08	590.791	1.29139	2.67276e-10
Pnpla8	1020.48	962.282	971.844	1372.45	1460.05	1655.36	0.603223	2.67685e-10
Lgals8	2255.85	1929.5	2097.14	3601.26	3731.01	2874.04	0.700066	2.84306e-10
Ccrl2	5.19063	3.95188	4.17549	130.937	85.4122	18.0757	4.13879	2.85214e-10
Dennd2c	94.4695	81.0134	76.2026	181.592	203.985	186.466	1.18434	3.02402e-10
Tspyl2	1311.15	1188.53	1335.11	1970.75	2027.79	1738.13	0.581149	3.20383e-10
Ifi205	20.7625	6.91578	13.5703	290.547	345.668	104.649	4.16912	3.32078e-10
Rsad2	121.461	98.7969	92.9046	3033.54	3005.51	563.202	4.39799	3.42331e-10
4930432K21Rik	166.1	150.171	174.327	345.025	300.45	481.386	1.20074	3.4621e-10
Gm14137	325.972	321.09	313.161	629.838	567.74	488.996	0.812541	3.46836e-10
LOC108167690	6.22876	6.91578	10.4387	70.7253	88.4268	33.2974	3.0294	3.49019e-10
Maats1	162.986	92.8691	126.308	335.467	291.406	286.358	1.25854	3.53264e-10
Ubl7	407.984	418.899	375.794	730.191	649.133	611.721	0.727028	3.61079e-10
Dhx36	3005.38	2887.83	2939.54	4776.83	4985.06	3889.14	0.628017	3.73879e-10
Plb1	2.07625	2.96391	4.17549	54.4776	41.1988	31.3947	3.78685	3.8481e-10
Bmp2k	1174.12	1224.09	1142	2029.05	1965.49	1591.62	0.657806	3.85744e-10
Lancl3	161.948	171.907	143.01	286.724	327.581	414.791	1.10936	3.88988e-10
Rhpn2	169.215	180.798	189.985	338.335	325.571	322.509	0.869304	3.89323e-10
Slc26a11	43.6013	33.5909	54.2813	166.3	158.766	104.649	1.71046	3.89943e-10
Malt1	250.189	224.269	257.836	496.989	426.056	407.18	0.861902	3.96483e-10
Tollip	2364.85	1989.77	2106.53	4356.3	4028.44	3003.43	0.817698	4.08248e-10
Tmem45a	13.4956	2.96391	7.3071	91.7517	83.4025	36.1515	3.15961	4.27726e-10
Gm7072	387.221	440.634	387.276	676.669	613.963	736.349	0.738061	4.27934e-10
Zeb2	3210.93	2662.58	2847.68	4191.91	4190.22	4735.84	0.589096	4.4508e-10
Gm32409	17.6482	13.8316	24.009	64.9908	106.514	75.157	2.15441	4.47003e-10
Dedd2	113.156	143.255	112.738	277.167	258.246	239.741	1.06879	4.50501e-10
Itprip	1187.62	1022.55	1177.49	1853.19	1757.48	1573.54	0.614087	4.74807e-10
Cpt1a	788.976	1009.7	1022.99	1590.36	1432.92	1551.66	0.697134	4.88428e-10
Sec23a	905.246	898.064	907.124	1671.6	1589.67	1233.91	0.729748	4.89917e-10
Casp8ap2	696.583	802.231	762.026	1220.49	1097.3	1107.38	0.599137	5.07354e-10
Gm35498	83.0501	65.2059	75.1588	250.406	253.222	144.606	1.53707	5.16013e-10
Gm2423	806.624	682.686	726.535	1225.27	1425.88	1075.98	0.750136	5.36879e-10
Atp8b3	6.22876	4.93984	10.4387	43.9644	55.2667	47.5677	2.76954	5.50753e-10
Ginm1	418.365	384.32	396.671	894.58	771.725	597.451	0.916512	5.93923e-10
Rbm39	12455.4	11228.3	11580.7	20497.9	19749.3	15956.1	0.672444	6.06335e-10
Bdh2	36.3344	20.7473	26.0968	97.4862	134.65	82.7679	1.922	6.52741e-10
Cd109	1530.2	1611.38	1506.31	2119.85	2367.43	2753.22	0.63947	6.81144e-10
Plekhh1	280.294	260.824	283.933	447.29	475.294	451.894	0.736559	6.96696e-10
Lamp1	12124.3	11486.1	11890.7	19138.8	18962.5	15669.8	0.598962	7.07096e-10
Xrn1	1463.76	1478.99	1417.58	3183.59	3052.73	1984.53	0.914756	7.16563e-10
Ttc26	147.414	163.015	171.195	394.724	398.925	267.331	1.13894	7.21553e-10
Ero1lb	82.012	58.2902	90.8168	336.423	409.979	146.509	1.95045	7.62842e-10
Hs1bp3	484.805	475.213	554.296	830.544	781.773	762.035	0.649301	7.83652e-10
Ubald2	1264.44	1141.1	1083.54	2073.02	1705.23	1704.83	0.652265	7.97812e-10
Sestd1	2039.92	2096.47	1923.86	3020.16	3202.46	4444.73	0.815778	8.0161e-10
Fbxo36	31.1438	47.4225	35.4916	105.132	117.567	114.163	1.55922	8.65336e-10
D3Ertd254e	225.273	301.33	262.012	511.325	467.255	452.845	0.859224	9.15125e-10
Arl4c	1436.77	1704.25	1435.32	2205.86	2223.73	2506.82	0.599788	9.24868e-10
Clcn6	1093.15	1122.33	1245.34	1861.8	1753.46	1576.4	0.585148	9.33207e-10
Msantd4	827.387	863.485	748.456	1387.75	1256.06	1147.33	0.635881	9.58513e-10
Acvr1b	374.764	391.236	317.337	644.174	608.939	567.959	0.748703	9.87483e-10
Hivep1	1290.39	1325.85	1344.51	1895.25	2012.71	2587.69	0.713794	9.91519e-10
Btbd10	983.106	799.267	906.081	1525.37	1497.23	1269.11	0.674993	9.97904e-10
A530032D15Rik	51.9063	50.3864	61.5884	214.087	192.931	111.309	1.66146	1.05172e-09
4930512H18Rik	7.26689	8.89172	6.26323	68.8138	68.3298	31.3947	2.90604	1.09429e-09
H2-K1	3855.6	3509.27	3956.27	9727.6	8341.26	5253.38	1.0427	1.12171e-09
Vamp3	2119.85	2102.4	1976.05	3423.49	3397.4	2712.31	0.620971	1.18959e-09
Phlda1	4066.34	4595.04	4392.61	6834.55	6440.08	9271.91	0.788432	1.22217e-09
Brox	2606.74	2210.09	2567.92	4940.26	5002.14	3373.5	0.850548	1.24529e-09
Il33	1.03813	4.93984	1.04387	58.3006	52.2522	23.7839	4.23552	1.27068e-09
1110008P14Rik	308.324	242.052	246.354	505.59	471.275	446.185	0.83733	1.38267e-09
Gm41429	17.6482	16.7955	18.7897	96.5305	75.3637	55.1786	2.09342	1.40711e-09
Nucb2	293.79	282.559	269.319	689.094	642.099	425.256	1.05424	1.48439e-09
Akap13	596.923	627.36	744.28	1189.91	1094.28	962.771	0.722105	1.5465e-09
Ndufv3	524.254	589.817	573.085	829.589	830.006	928.522	0.617224	1.57026e-09
Phf11d	441.204	354.681	459.303	3345.12	3467.74	1291.94	2.69092	1.60624e-09
Nipal1	253.303	176.846	179.546	372.741	409.979	442.38	1.0074	1.64737e-09
Wdr86	102.775	143.255	116.914	306.795	306.479	219.763	1.19702	1.66438e-09
Rasa4	119.385	160.051	125.265	259.008	274.324	349.147	1.12372	1.68136e-09
Ankle2	1315.31	1380.19	1337.2	2313.86	2325.22	1775.23	0.669366	1.68569e-09
Rgs17	160.91	209.449	199.379	363.184	444.144	333.926	1.00107	1.69081e-09
Mxra8	508.682	573.022	537.594	849.659	892.307	769.646	0.63264	1.71354e-09
Mbtd1	367.497	392.224	414.417	787.536	755.647	568.91	0.846869	1.73176e-09
Chmp1b	478.576	365.548	448.865	781.801	665.211	768.695	0.778042	1.73346e-09
Itm2b	5811.43	5468.41	5397.86	9076.73	8867.8	7254.08	0.595405	1.8457e-09
Mx2	171.291	134.364	192.072	3625.15	3281.84	744.911	3.94248	1.99254e-09
Taf7	123.537	127.448	123.177	378.476	320.547	212.152	1.28373	2.06589e-09
Wdr44	286.523	257.86	246.354	546.688	542.619	402.423	0.915468	2.13075e-09
Zwilch	1145.05	1252.74	1206.72	1733.73	1661.02	2039.71	0.592389	2.13866e-09
Gnai3	5019.34	4828.2	4623.31	9062.4	8635.68	6395.96	0.735498	2.2258e-09
Riok3	3213	2726.79	2908.23	5130.45	4945.87	3955.73	0.665326	2.23995e-09
Ik	2255.85	2253.56	2158.73	4330.49	4094.76	2941.59	0.769409	2.30616e-09
Dtd2	334.277	340.849	366.399	593.519	515.488	578.424	0.696687	2.32154e-09
AW011738	46.7157	64.218	60.5446	261.875	261.261	108.454	1.87984	2.36151e-09
Pcdh9	0	0	0	42.0529	33.16	24.7352	7.46791	2.3823e-09
Ss18	928.085	942.522	997.941	1621.9	1420.86	1308.11	0.601075	2.44712e-09
Zfp260	536.711	597.721	578.305	1013.09	1087.25	798.187	0.758552	2.56919e-09
Dnase2a	219.045	257.86	245.31	431.042	393.901	536.564	0.914805	2.57316e-09
Usp35	154.681	135.352	150.318	394.724	372.799	240.693	1.19516	2.62085e-09
Gm34667	8.30501	3.95188	15.6581	65.9466	55.2667	47.5677	2.60539	2.62463e-09
Terf2ip	175.443	221.305	186.853	474.051	413.998	319.655	1.04834	2.64926e-09
Gbp2b	101.736	89.9052	140.923	2526.04	2478.96	518.488	4.054	2.68536e-09
Gm41442	48.7919	70.1458	69.9394	152.92	165.8	145.557	1.29614	2.77216e-09
Nfkbid	33.2201	39.5188	50.1058	98.442	127.616	130.336	1.53694	2.80973e-09
Galns	322.857	398.151	348.653	594.475	552.667	623.137	0.726381	2.88132e-09
Arrdc3	1593.52	2078.69	1889.41	2973.33	2860.81	4056.58	0.83054	2.98471e-09
Zkscan14	56.0588	28.6511	26.0968	129.982	119.577	117.017	1.72791	3.00092e-09
Slc26a7	31.1438	43.4706	52.1936	107.999	121.587	132.238	1.51263	3.06889e-09
Apbb2	1158.55	1369.32	1334.07	1756.66	2017.74	2151.96	0.617661	3.09763e-09
Gm4070	145.338	119.544	117.957	536.174	481.323	205.493	1.67554	3.13412e-09
Lgals3bp	3113.34	2904.63	3385.28	7241.7	7159.56	4228.77	0.986396	3.15425e-09
Odf2l	658.172	799.267	673.297	1076.17	1156.58	1497.43	0.807699	3.24477e-09
Zfp422-ps	180.634	197.594	222.345	420.529	364.761	334.877	0.899531	3.40948e-09
Gbp2	118.346	104.725	126.308	2879.67	2770.37	517.537	4.14189	3.42714e-09
Tox4	1011.14	988.957	978.108	2191.53	1944.38	1345.22	0.879964	3.47264e-09
Tmbim4	1202.15	948.45	1075.19	2397.97	2067.98	1518.36	0.891651	3.56907e-09
Nudt2	93.4314	111.64	112.738	202.618	214.033	248.304	1.06491	3.71174e-09
Ttc28	371.649	478.177	467.654	774.155	670.235	760.133	0.742576	4.4256e-09
Gpr17	9.34314	4.93984	7.3071	38.2299	40.194	88.476	2.95608	4.45245e-09
Fgfrl1	90.317	91.8811	107.519	221.733	205.994	183.612	1.07779	4.45668e-09
Orai1	210.74	203.522	207.73	426.263	332.605	365.32	0.854537	4.73408e-09
Serinc1	4941.48	4312.48	4356.08	8737.44	8327.19	6051.57	0.764227	4.85811e-09
Acer3	875.141	737.025	721.315	1130.65	1169.65	1228.2	0.596773	4.88948e-09
LOC100503496	83.0501	68.1698	67.8517	171.079	200.97	146.509	1.24278	5.09016e-09
Gm38510	48.7919	59.2781	45.9303	198.795	190.921	100.844	1.66974	5.19841e-09
Fam26e	69.5545	70.1458	74.1149	192.105	180.873	136.044	1.25114	5.27693e-09
Stau2	666.477	598.709	627.367	866.863	1022.94	985.604	0.603457	5.29046e-09
Zfp281	503.491	555.238	548.033	825.766	821.967	756.327	0.580978	5.48998e-09
Ndc80	1238.49	1407.86	1289.18	1836.95	1993.62	2472.57	0.679455	5.54311e-09
Dscr3	1049.55	950.426	960.362	1568.38	1556.51	1308.11	0.582493	5.89219e-09
Tmem116	2.07625	8.89172	11.4826	59.2563	40.194	50.4218	2.7379	5.95529e-09
Nrcam	30.1057	20.7473	29.2284	102.265	126.611	66.5948	1.88462	6.26187e-09
Rnase4	314.552	337.885	307.942	494.121	571.76	499.461	0.703946	6.35448e-09
Eogt	1062	983.029	1048.05	1622.86	1730.35	1361.39	0.608012	6.37045e-09
Fbxo34	452.623	447.55	442.602	761.731	626.022	722.078	0.652338	6.49098e-09
Odc1	19162.8	17741	17977.6	26757.1	26268.8	33862.5	0.662863	6.52608e-09
Grip1	310.4	234.149	272.45	464.493	507.449	729.689	1.05925	6.58461e-09
Slfn3	445.356	440.634	391.452	1214.75	1091.27	600.305	1.18573	6.62599e-09
Zbtb43	487.919	534.491	527.155	815.253	774.739	733.495	0.584207	6.70788e-09
Gm36470	123.537	118.556	121.089	226.512	220.062	262.574	0.966019	7.07231e-09
Mxd1	187.901	185.738	181.634	357.45	398.925	292.066	0.91631	7.33355e-09
Zhx1	1000.75	889.172	971.844	1533.97	1670.06	1279.57	0.647711	7.41009e-09
Casp4	292.752	210.437	232.783	1305.55	1212.85	611.721	2.08859	7.60326e-09
Abi3bp	14.5338	9.87969	8.35097	81.2385	69.3346	36.1515	2.511	7.60547e-09
Bcl9	305.209	302.318	343.434	590.652	639.085	465.213	0.833623	7.89909e-09
Zfp212	314.552	364.56	335.083	526.617	565.731	523.245	0.670926	8.24567e-09
Fbxo44	394.488	401.115	416.505	677.625	582.813	623.137	0.636345	8.49032e-09
Clu	397.602	377.404	407.11	756.952	856.132	560.348	0.878358	8.70583e-09
Cd63-ps	596.923	549.311	597.095	1014.05	1062.13	792.479	0.718451	8.93073e-09
Layn	389.297	481.141	387.276	652.775	693.346	858.122	0.809039	8.96968e-09
Pax3	161.948	142.268	136.747	337.379	298.44	245.45	0.998973	9.03286e-09
Sirt1	270.951	274.655	274.538	490.298	529.556	403.375	0.794695	9.44493e-09
Prl2c2	1.03813	3.95188	0	64.0351	91.4413	242.596	6.29971	1.02031e-08
Serac1	412.136	477.189	463.479	834.367	848.093	633.602	0.775231	1.02981e-08
Pex1	200.358	236.125	231.739	362.228	378.828	438.575	0.819759	1.05323e-08
Pou2f2	4.15251	4.93984	1.04387	31.5397	34.1649	39.9569	3.37214	1.08688e-08
Plin2	4217.91	3316.61	3846.67	13558.2	12452.1	7268.35	1.54796	1.09294e-08
H2-D1	11687.2	10607.8	11102.6	26355.7	24025	14925.8	0.967476	1.14611e-08
Gns	3173.55	3148.66	3124.31	5566.27	5223.21	4033.75	0.649967	1.17684e-08
Tnfrsf22	690.354	769.628	634.674	1181.3	1073.18	986.555	0.62931	1.19208e-08
Ifngr2	459.89	442.61	422.768	673.802	629.036	711.614	0.604372	1.26286e-08
Bcorl1	126.651	179.81	174.327	371.786	314.518	288.261	1.01875	1.28401e-08
Lhx6	87.2026	114.604	119.001	273.344	247.193	192.174	1.15098	1.31887e-08
Lmo7	2160.34	2487.71	2313.22	3609.86	3625.5	5821.34	0.907386	1.43307e-08
Ap3s1	1302.85	1326.84	1203.58	2021.41	2064.97	1656.31	0.582888	1.44485e-08
Klf7	1682.8	2058.93	1923.86	2679.92	2960.29	3813.98	0.738686	1.48012e-08
Ampd3	91.3551	100.773	128.396	215.999	240.159	419.548	1.45077	1.53101e-08
Tnc	44.6394	35.5669	41.7549	99.3977	101.49	123.676	1.41396	1.58792e-08
Dennd4c	1310.12	1395.01	1369.56	2138.01	2214.69	1742.88	0.580855	1.63112e-08
Il13ra1	22.8388	14.8195	26.0968	104.176	106.514	53.2759	2.05219	1.64371e-08
Dnajb6	1839.56	1673.62	1799.63	2940.83	2733.19	2284.2	0.583021	1.73908e-08
Gsap	130.804	180.798	148.23	265.698	330.596	307.288	0.972922	1.79081e-08
Me1	1544.73	1557.04	1462.46	2411.35	2523.18	1948.37	0.592442	1.83762e-08
Dirc2	423.556	421.863	436.338	835.323	759.667	591.743	0.770568	1.84215e-08
Gm34719	58.1351	47.4225	65.7639	152.92	155.752	117.017	1.31431	1.85174e-08
Eif2b3	948.848	866.449	828.834	1379.14	1484.16	1176.83	0.611403	1.92487e-08
Smarce1-ps1	42.5632	58.2902	38.6232	122.336	116.563	118.919	1.35642	1.95282e-08
Swap70	1262.36	1360.43	1336.16	2137.05	2145.35	1693.41	0.593817	1.9772e-08
Necap1	1397.32	1391.06	1366.43	2463.92	2231.77	1787.6	0.641876	2.01174e-08
Ap3s2	685.164	721.217	661.815	1332.31	1249.03	919.009	0.758854	2.03416e-08
4833439L19Rik	1568.61	1677.57	1602.34	3419.66	3335.1	2083.47	0.866104	2.09161e-08
Rbm45	529.445	546.347	532.374	977.73	1075.19	725.884	0.788655	2.0997e-08
Map1lc3b	1626.74	1477.01	1583.55	2789.83	2817.6	2012.12	0.700913	2.19494e-08
Rnf170	258.494	283.547	296.46	418.617	470.27	497.559	0.725409	2.25359e-08
C1s2	45.6776	39.5188	42.7987	101.309	117.567	105.6	1.34232	2.27921e-08
Nmnat2	118.346	154.123	134.659	417.662	395.911	214.055	1.33486	2.28427e-08
Ypel3	243.96	272.679	240.09	397.591	405.959	457.602	0.736476	2.34353e-08
Cyr61	4213.76	4750.15	4604.52	7054.37	7022.9	11531.4	0.916394	2.34497e-08
Foxn3	467.157	535.479	539.682	976.774	903.36	710.662	0.748034	2.36776e-08
Usp27x	129.766	134.364	141.967	257.096	247.193	237.839	0.86995	2.37829e-08
Fgf10	237.731	240.076	207.73	405.237	353.707	471.872	0.844502	2.38266e-08
Plaa	1635.05	1480.97	1402.96	2507.88	2378.48	1967.4	0.60085	2.58904e-08
Naip2	613.533	560.178	564.735	959.57	973.7	779.16	0.641664	2.60927e-08
Fcgrt	524.254	473.237	520.892	762.686	706.41	807.7	0.585168	2.6115e-08
Gm36556	36.3344	34.5789	33.4039	94.619	83.4025	147.46	1.6427	2.65753e-08
Gdpd1	103.813	87.9292	97.0801	222.689	255.232	166.487	1.15763	2.70128e-08
Gm3772	1.03813	1.97594	2.08774	27.7167	42.2037	26.6379	4.23773	2.72239e-08
Rnf34	358.154	352.705	350.741	995.889	841.059	490.899	1.13264	2.81271e-08
Pcmtd1	737.07	754.808	680.604	997.8	1056.1	1232.96	0.597298	2.8697e-08
Phlpp1	266.799	290.463	245.31	503.679	531.566	393.861	0.831482	2.89111e-08
Serpinb9	327.01	347.765	325.688	652.775	725.502	469.969	0.884884	2.89513e-08
Fam129a	5967.15	5605.73	5682.84	11348.5	11091.5	7368.24	0.788625	3.07622e-08
Ankrd28	2044.07	2121.17	1978.14	2972.37	3109.01	4584.58	0.795947	3.08776e-08
Ankhd1	2883.92	2988.61	2941.63	5102.74	4858.45	3712.19	0.633415	3.11697e-08
Crot	1346.45	1304.12	1337.2	2275.63	2359.39	1695.31	0.666587	3.18719e-08
Hgs	1270.67	1285.35	1200.45	2528.91	2204.64	1632.53	0.760935	3.18973e-08
Fnbp4	1998.39	1858.37	2213.01	3363.28	3380.32	2631.45	0.627221	3.21195e-08
Jmy	647.791	674.783	614.84	1154.54	1208.83	857.171	0.732772	3.26024e-08
Soat1	2686.67	2357.29	2470.84	4448.05	4113.86	3227.95	0.649754	3.33339e-08
Dll1	17.6482	12.8436	5.21936	53.5219	57.2764	54.2272	2.20609	3.507e-08
Cnep1r1	1368.25	1336.72	1329.89	2211.6	2271.97	1706.73	0.617348	3.57855e-08
Six1	118.346	174.87	109.607	321.131	335.62	241.644	1.15513	4.10845e-08
Nbea	971.686	948.45	971.844	2067.28	2225.74	1238.66	0.935536	4.40065e-08
Gins3	330.124	313.186	281.845	548.599	510.464	452.845	0.708357	4.58856e-08
Manba	118.346	161.039	139.879	250.406	286.382	260.671	0.926008	4.62513e-08
Primpol	419.403	433.718	476.005	687.182	638.08	833.387	0.700148	4.69458e-08
Tmcc1	656.096	569.07	683.736	1158.37	1103.33	861.928	0.710678	4.69973e-08
Atg12	1988.01	1905.79	1877.92	3367.1	3461.71	2429.76	0.681696	4.78125e-08
Sel1l	3428.93	3293.89	3534.55	7708.1	7419.81	4325.81	0.923369	4.8448e-08
Cpeb3	41.5251	62.242	57.4129	218.866	194.941	97.9896	1.66557	5.12021e-08
Zfp229	157.795	216.365	208.774	344.069	345.668	353.904	0.83954	5.22321e-08
Dusp1	318.705	407.043	372.662	626.015	642.099	1152.09	1.13972	5.22861e-08
Topors	1295.58	1141.1	1242.21	2346.36	2216.7	1579.25	0.739522	5.44189e-08
Tnfaip6	9.34314	10.8677	11.4826	78.3713	57.2764	32.3461	2.40566	5.5303e-08
Acod1	0	0	1.04387	41.0971	43.2085	31.3947	6.71662	5.56851e-08
Yap1	2213.29	2262.45	2120.1	3977.82	3528.03	2801.74	0.644014	5.59157e-08
Tmem74	834.654	768.64	777.684	1131.6	1223.91	1689.61	0.764832	6.02244e-08
Fam171b	1826.06	1313.01	1688.98	3272.48	3534.06	2183.36	0.896922	6.02805e-08
Apaf1	808.701	821.99	900.861	1628.59	1557.52	1095.96	0.75822	6.03851e-08
Prss57	313.514	234.149	239.047	587.785	541.614	396.715	0.956159	6.12653e-08
Urod	179.596	250.944	223.389	387.078	375.814	385.299	0.811278	6.20003e-08
Rundc3b	230.464	263.788	223.389	414.794	361.746	452.845	0.776422	6.32826e-08
Mndal	1781.43	1460.22	1604.43	7530.33	6621.96	3427.73	1.85906	6.33614e-08
Palld	452.623	502.876	490.62	823.854	813.928	650.727	0.661799	6.40972e-08
Lrp12	701.774	726.157	671.209	1144.99	1134.48	912.349	0.604218	6.44433e-08
Naa20	2044.07	1834.66	1812.16	3556.34	3246.67	2429.76	0.69809	6.54814e-08
Psmb8	109.003	115.592	126.308	358.405	365.765	177.903	1.3618	6.58985e-08
Serinc5	213.854	272.679	245.31	432.954	417.013	383.396	0.752119	6.619e-08
Chmp2b	1246.79	1159.88	1157.65	1881.87	2053.91	1521.22	0.614322	6.77041e-08
Cd80	1394.2	1123.32	1235.94	2501.19	2488.01	1630.62	0.818586	6.7953e-08
Irf2bpl	780.671	859.533	792.299	1403.99	1400.76	1049.34	0.663602	7.23376e-08
AU018091	120.423	154.123	145.098	225.556	295.426	316.801	0.996609	7.59016e-08
Frrs1	1199.04	1265.59	1287.09	2057.72	2110.18	1581.15	0.615603	7.65042e-08
Enthd1	14.5338	17.7834	17.7458	64.9908	71.3443	47.5677	1.87527	7.82559e-08
Bsdc1	798.319	728.133	840.317	1380.1	1243	1045.54	0.63252	8.04107e-08
Rad18	841.921	815.074	854.931	1157.41	1251.04	1645.84	0.690864	8.79453e-08
Dmxl2	211.778	227.233	234.871	395.679	418.018	332.974	0.76637	8.90114e-08
9330188P03Rik	1294.54	1034.4	1252.65	1607.57	1872.04	1906.52	0.588904	9.04398e-08
Pdp1	395.526	484.105	432.163	620.28	711.434	810.554	0.707184	9.27754e-08
Prss56	30.1057	12.8436	24.009	99.3977	97.4704	57.0813	1.92681	9.43867e-08
Clcn5	1202.15	1247.8	1234.9	2009.94	2329.24	1574.49	0.682215	9.57682e-08
Cenpk	133.918	172.895	155.537	283.857	269.3	420.499	1.07434	1.02319e-07
LOC108167924	43.6013	43.4706	55.3252	106.088	109.529	128.433	1.27413	1.03293e-07
Atp8b4	13.4956	19.7594	16.7019	63.0793	64.3104	50.4218	1.82845	1.10842e-07
Trpm4	264.722	279.595	305.854	473.095	411.988	531.807	0.737559	1.12147e-07
Clcf1-pold4	312.476	268.728	278.714	493.166	415.003	568.91	0.781332	1.16118e-07
Usp54	280.294	351.717	321.512	495.077	487.352	562.251	0.695595	1.16668e-07
Cxcl11	3.11438	0.987969	5.21936	61.1678	58.2813	12.3676	3.83216	1.19445e-07
Prkab1	1155.43	1204.33	1136.78	2268.94	1954.43	1492.68	0.708988	1.19807e-07
Rab43	1680.73	1579.76	1695.25	3007.74	2779.41	2074.91	0.665803	1.20138e-07
Zfp949	160.91	157.087	191.028	346.936	346.673	260.671	0.906836	1.20573e-07
Lrig2	664.401	690.59	675.385	1097.2	1241.99	883.809	0.666256	1.24048e-07
Gprc5a	1403.55	1398.96	1434.28	2609.19	2246.84	1797.11	0.651052	1.26495e-07
Eif2ak3	614.571	556.226	591.875	1252.03	1200.8	761.084	0.866507	1.34154e-07
Kansl1l	417.327	428.778	495.839	705.342	701.385	630.748	0.602602	1.35123e-07
Serpinb9g	1.03813	3.95188	4.17549	32.4954	48.2328	19.9785	3.4513	1.35309e-07
Fam161a	6.22876	8.89172	5.21936	29.6282	43.2085	43.7623	2.51324	1.35495e-07
Pfdn6	422.518	476.201	388.32	644.174	668.225	635.505	0.597036	1.35612e-07
Ikzf5	724.612	562.154	603.358	1143.07	1075.19	866.684	0.706954	1.35655e-07
Ptprq	38.4107	44.4586	44.8865	84.1058	124.601	126.53	1.39091	1.37305e-07
Tbc1d24	194.13	201.546	173.283	436.777	418.018	275.893	0.990117	1.43054e-07
9430020K01Rik	927.047	953.39	956.186	1248.21	1434.93	1777.13	0.653015	1.46925e-07
Neo1	3399.86	3636.71	3461.48	6333.74	6191.89	4339.13	0.683824	1.50789e-07
Slco2a1	8.30501	13.8316	14.6142	39.1856	50.2425	89.4274	2.28247	1.51951e-07
Gtf2f2	690.354	583.89	589.787	1113.45	1062.13	826.727	0.687658	1.52949e-07
Kcnq1ot1	179.596	195.618	215.038	352.671	319.542	521.343	1.01645	1.57232e-07
Tmem53	14.5338	8.89172	18.7897	53.5219	45.2182	77.0598	2.06436	1.64693e-07
Nphp3	53.9826	81.0134	74.1149	146.229	148.718	163.633	1.13165	1.65552e-07
Stx12	963.381	921.775	809	1571.25	1439.95	1175.87	0.635941	1.67218e-07
Gm11517	13.4956	11.8556	11.4826	50.6546	53.257	41.8596	1.98428	1.80853e-07
Atg13	825.311	730.109	816.308	1742.33	1648.96	1002.73	0.889597	1.84659e-07
Prkcg	70.5926	58.2902	60.5446	147.185	213.028	118.919	1.33807	1.8519e-07
Gm4951	24.915	17.7834	14.6142	136.672	118.572	36.1515	2.34584	1.97653e-07
Mrpl40	422.518	482.129	438.426	668.067	622.002	722.078	0.58307	1.99554e-07
Trip12	6121.83	6254.83	6169.28	10225.5	10022.4	7606.08	0.586749	2.07871e-07
Gm15319	9.34314	3.95188	4.17549	43.0086	38.1843	28.5406	2.6553	2.08057e-07
Tdrd7	1354.76	1371.3	1402.96	4138.39	4229.41	2360.31	1.3775	2.0904e-07
Pggt1b	1530.2	1410.82	1469.77	2560.45	2362.4	1837.07	0.615965	2.09602e-07
Nsun3	204.511	200.558	204.599	312.529	337.63	429.061	0.824284	2.10215e-07
Rassf5	43.6013	60.2661	58.4568	117.557	124.601	126.53	1.18236	2.19243e-07
Car7	7.26689	10.8677	20.8774	79.327	44.2134	54.2272	2.19171	2.33296e-07
Pdgfra	187.901	238.1	201.467	411.927	406.964	311.093	0.847557	2.42712e-07
Rps6ka3	4586.44	4221.59	4444.81	6963.58	7442.92	5462.68	0.584203	2.533e-07
Ufl1	578.237	609.577	620.06	1064.7	1026.96	775.354	0.665035	2.53697e-07
Fem1c	823.234	852.617	872.677	1607.57	1487.18	1071.23	0.708871	2.59876e-07
Kat2b	726.689	811.122	750.544	1306.51	1306.3	972.285	0.647329	2.62214e-07
Gm32483	15.5719	27.6631	27.1407	63.0793	95.4607	70.4003	1.69878	2.62484e-07
Ankrd17	4852.2	4991.22	5062.78	9282.22	8650.75	6124.82	0.690568	2.63172e-07
Arid3a	152.605	199.57	165.976	315.397	314.518	280.65	0.812029	2.68016e-07
Rab8b	915.628	773.58	846.58	1434.58	1282.19	1110.23	0.593993	2.6944e-07
Slc17a5	250.189	227.233	219.213	492.21	433.09	332.023	0.851801	2.74045e-07
Asl	187.901	227.233	187.897	469.272	413.998	293.017	0.963118	2.79418e-07
Tom1	124.575	133.376	113.782	367.007	319.542	183.612	1.22635	2.83121e-07
Rab3a	66.4401	95.833	76.2026	160.566	166.805	165.536	1.04547	2.84358e-07
Lrp5	384.107	438.658	347.609	645.129	646.119	553.689	0.655708	2.88484e-07
Gm26637	31.1438	19.7594	20.8774	112.778	134.65	46.6164	2.03457	2.91389e-07
Neu1	139.109	142.268	151.361	362.228	289.397	220.714	1.01145	2.97927e-07
Cd74	85.1264	78.0495	78.2904	336.423	267.29	118.919	1.58132	3.06041e-07
Dcn	75.7832	60.2661	76.2026	221.733	255.232	112.26	1.47314	3.14118e-07
Ccdc112	95.5076	82.9894	73.071	170.123	151.732	195.979	1.04219	3.14305e-07
Ctbs	519.063	536.467	511.497	718.722	773.734	973.236	0.65404	3.15886e-07
Txndc16	319.743	311.21	315.249	460.67	460.221	527.051	0.614148	3.19313e-07
Gbp5	22.8388	13.8316	32.36	391.856	410.984	90.3787	3.69479	3.21066e-07
Tango2	219.045	221.305	204.599	317.308	364.761	431.915	0.788384	3.22702e-07
LOC108168990	413.174	408.031	444.689	2699.03	2430.73	953.258	2.26463	3.27715e-07
Ddx60	293.79	245.016	323.6	1810.19	1664.03	667.851	2.26398	3.28155e-07
LOC108167732	46.7157	35.5669	44.8865	93.6632	110.533	101.795	1.26809	3.29404e-07
LOC108167333	12.4575	14.8195	19.8336	39.1856	69.3346	78.0111	1.98587	3.34053e-07
Gli1	85.1264	101.761	84.5536	328.777	400.935	126.53	1.65642	3.35318e-07
Smap1	1600.79	1530.36	1579.38	2566.18	2553.32	1924.59	0.580454	3.39108e-07
Olfml2b	502.453	688.614	515.673	833.412	929.486	1060.76	0.725738	3.39791e-07
Tnfsf10	4.15251	3.95188	6.26323	69.7696	86.4171	9.51355	3.52898	3.45135e-07
Gm36043	8.30501	9.87969	15.6581	128.07	88.4268	20.9298	2.81166	3.59951e-07
Gramd3	28.0294	19.7594	33.4039	104.176	68.3298	74.2057	1.60732	3.69155e-07
LOC102637854	0	4.93984	4.17549	39.1856	29.1406	22.8325	3.31192	3.72932e-07
Fbxo32	5.19063	4.93984	3.13161	27.7167	31.1503	32.3461	2.77919	3.8005e-07
Cobl	37.3726	41.4947	37.5794	86.0173	89.4316	136.995	1.42403	3.8896e-07
Gm36355	13.4956	12.8436	15.6581	45.8759	45.2182	65.6435	1.90224	3.95391e-07
Prkcd	1491.79	1401.93	1480.21	2702.85	2671.9	1784.74	0.710875	3.96002e-07
Plekhm3	293.79	332.945	327.776	538.086	574.774	438.575	0.700106	3.96247e-07
Gbp3	247.074	222.293	276.626	3472.23	3385.34	707.808	3.3422	4.01804e-07
Bhlhe41	169.215	196.606	168.063	281.945	314.518	301.58	0.7491	4.13224e-07
Rfx5	279.256	278.607	338.214	471.183	458.212	468.067	0.641735	4.19341e-07
LOC101055907	56.0588	83.9773	84.5536	163.433	143.694	181.709	1.12176	4.31985e-07
Dnajb9	500.377	390.248	415.461	1721.3	1616.8	843.852	1.67895	4.32756e-07
Sdcbp	4444.22	3980.53	4124.34	7214.94	7090.22	5132.56	0.631264	4.40808e-07
Serinc4	288.599	342.825	360.136	618.369	664.206	454.748	0.80861	4.50937e-07
Gm12185	42.5632	29.6391	42.7987	142.406	123.597	72.303	1.55819	4.79833e-07
Fndc7	8.30501	5.92781	0	28.6724	30.1455	64.6921	3.11338	4.81328e-07
Efr3b	0	0.987969	0	52.5661	36.1746	12.3676	6.52246	4.95807e-07
Tmem236	1.03813	4.93984	3.13161	89.8403	50.2425	7.61084	4.01087	4.98772e-07
B230206H07Rik	180.634	172.895	178.502	302.972	293.416	276.844	0.715005	5.02034e-07
Socs3	132.88	232.173	174.327	436.777	404.955	294.92	1.07409	5.07757e-07
Rpp40	301.057	277.619	306.898	603.077	541.614	400.52	0.803206	5.3394e-07
Evi2a	14.5338	9.87969	18.7897	50.6546	44.2134	67.5462	1.91608	5.48802e-07
Gm26944	236.693	215.377	202.511	345.981	373.804	334.877	0.687815	5.50487e-07
Rilpl2	883.446	821.002	838.229	1219.53	1161.61	1667.73	0.671455	5.60447e-07
Pkn2	5038.03	4800.54	4862.35	8977.34	9006.47	5933.6	0.702129	5.6404e-07
Ifnb1	4.15251	2.96391	5.21936	38.2299	35.1697	19.9785	2.92453	5.75086e-07
Cand2	229.426	332.945	268.275	739.748	645.114	384.347	1.09014	5.95542e-07
Picalm	5937.05	5078.16	5428.13	9563.21	9264.72	6777.45	0.638946	5.95611e-07
Usp32	1539.54	1467.13	1529.27	2788.87	2538.25	1849.43	0.661862	5.96435e-07
Unc13c	611.457	498.924	593.963	772.244	880.249	1020.8	0.64989	6.0149e-07
Cdhr2	22.8388	11.8556	16.7019	73.5925	63.3055	45.665	1.83199	6.2562e-07
Nfrkb	849.188	870.4	953.055	1655.35	1448.99	1127.36	0.662976	6.25711e-07
Slu7	1031.9	822.978	893.554	1773.87	1642.93	1169.22	0.7387	6.28764e-07
Cfap74	23.8769	29.6391	32.36	78.3713	82.3977	69.4489	1.42189	6.33161e-07
Heca	312.476	386.296	298.547	501.767	516.493	563.202	0.66429	6.51655e-07
Stat3	811.815	854.593	862.238	2603.46	2588.49	1423.23	1.38737	6.67544e-07
Inpp5k	268.875	268.728	247.398	414.794	374.809	432.867	0.639236	6.79646e-07
Acot13	229.426	225.257	239.047	394.724	327.581	464.261	0.775185	7.12733e-07
Trdmt1	154.681	111.64	116.914	232.247	226.091	346.293	1.07123	7.2655e-07
Rab1a	3474.61	3083.45	3310.12	6103.4	5684.44	4005.2	0.678434	7.46184e-07
Fam63b	268.875	346.777	362.223	489.343	524.532	572.716	0.698004	7.50668e-07
Tmx4	890.713	1127.27	983.327	1339.96	1509.28	1828.5	0.640028	7.50841e-07
Gvin1	28.0294	42.4827	46.9742	157.698	145.703	69.4489	1.66513	7.64324e-07
Vtcn1	21.8007	21.7353	15.6581	55.4333	59.2861	66.5948	1.61353	7.71277e-07
Spata13	239.807	354.681	270.363	450.157	506.444	529.905	0.780297	7.71977e-07
Pkp3	25.9532	38.5308	31.3161	72.6368	81.3928	137.946	1.60668	7.87642e-07
Klrg2	121.461	142.268	112.738	335.467	308.489	183.612	1.13531	7.87724e-07
Tcp11x2	51.9063	30.627	36.5355	129.026	121.587	78.0111	1.46598	8.01577e-07
Gm36099	21.8007	14.8195	17.7458	50.6546	78.3783	53.2759	1.74614	8.11366e-07
Stx6	993.487	899.052	871.633	1564.56	1517.32	1149.24	0.614093	8.20574e-07
Bid	1093.15	968.209	1038.65	2077.79	1969.51	1260.55	0.775831	8.43901e-07
Pink1	371.649	437.67	405.022	588.74	576.784	718.273	0.633388	8.52603e-07
Dlgap1	7.26689	5.92781	9.39484	43.9644	40.194	27.5893	2.30954	8.97029e-07
Tsc22d3	734.994	806.183	780.816	1079.04	1141.51	1676.29	0.747029	9.07869e-07
Zfp78	56.0588	47.4225	42.7987	103.221	105.509	118.919	1.16383	9.27235e-07
Sec22a	273.027	290.463	241.134	393.768	474.289	416.693	0.674037	9.33564e-07
Stau1	1721.21	1682.51	1649.32	2857.68	2870.86	2024.48	0.617501	9.95014e-07
Lyn	167.138	255.884	251.573	481.697	499.41	338.682	0.967449	1.00257e-06
Tgoln1	3151.75	2996.51	3241.22	5831.97	5594	3751.19	0.692768	1.0057e-06
Tmem151a	257.455	281.571	270.363	401.414	395.911	485.191	0.664171	1.01885e-06
Stmn4	4.15251	3.95188	6.26323	297.237	185.897	20.9298	5.13386	1.02898e-06
Als2cr12	29.0675	40.5067	32.36	68.8138	93.451	145.557	1.59328	1.03432e-06
Cacna2d1	366.459	328.006	395.627	713.943	696.361	477.58	0.792424	1.04123e-06
Cd82	337.391	321.09	312.118	536.174	441.129	503.267	0.609712	1.04755e-06
Usp18	830.501	631.312	881.028	9107.32	8114.16	2034.95	3.03903	1.05039e-06
Pdcd4	89.2789	131.4	98.1239	208.353	198.96	203.59	0.936462	1.07126e-06
Tmem243	316.629	271.691	301.679	535.219	508.454	404.326	0.7024	1.0759e-06
Selplg	1.03813	0.987969	1.04387	18.1592	19.0921	44.7137	4.741	1.10897e-06
Mtss1	358.154	440.634	445.733	615.501	632.051	896.176	0.78462	1.14373e-06
Bank1	19.7244	18.7714	22.9652	77.4155	81.3928	43.7623	1.72061	1.14833e-06
Dthd1	174.405	145.231	157.625	327.821	369.785	228.325	0.955925	1.15554e-06
Nr6a1	335.315	311.21	350.741	749.306	612.958	441.429	0.855046	1.19844e-06
Xaf1	451.585	423.839	501.058	2891.14	2783.43	985.604	2.27458	1.35949e-06
Gm5884	138.071	116.58	159.712	272.388	267.29	217.86	0.871325	1.40685e-06
Cnppd1	2053.41	1891.96	2006.32	3346.07	3266.77	2376.48	0.594886	1.47394e-06
Mr1	44.6394	55.3263	31.3161	86.973	131.635	117.017	1.35089	1.47566e-06
Ccdc82	842.959	978.089	950.967	1341.87	1222.9	1737.17	0.634163	1.47707e-06
Ighe	0	0	0	27.7167	19.0921	5.70813	6.53904	1.48468e-06
Snx16	375.802	328.006	388.32	491.254	584.823	624.089	0.638991	1.49373e-06
Fbxo21	570.97	779.507	661.815	1078.08	1109.35	915.203	0.624023	1.50227e-06
Stx3	362.306	366.536	346.565	544.776	594.871	480.434	0.590556	1.50771e-06
Enah	690.354	705.41	627.367	1290.26	1356.55	826.727	0.779499	1.53538e-06
LOC105245970	9.34314	0	1.04387	36.3184	41.1988	23.7839	3.29887	1.55403e-06
Fosb	210.74	240.076	244.266	446.334	441.129	316.801	0.792373	1.55682e-06
Tmem140	221.121	232.173	251.573	2223.07	2165.45	557.494	2.81083	1.5729e-06
Atg14	134.956	182.774	164.932	381.343	272.314	264.477	0.927285	1.58069e-06
Trp53cor1	43.6013	48.4105	54.2813	93.6632	108.524	169.341	1.34536	1.58334e-06
Myom1	15.5719	10.8677	15.6581	62.1236	53.257	37.1028	1.8595	1.60206e-06
Lef1	286.523	197.594	229.652	463.537	484.338	345.342	0.857784	1.69093e-06
Gm32733	49.8301	38.5308	34.4478	99.3977	96.4656	90.3787	1.22117	1.7603e-06
Gpr19	72.6689	63.23	73.071	126.159	155.752	136.995	1.00358	1.77296e-06
Gm33357	16.61	26.6752	26.0968	66.9023	59.2861	71.3516	1.50849	1.81039e-06
4930523C07Rik	49.8301	54.3383	62.6323	104.176	116.563	156.022	1.17631	1.86109e-06
Hic2	110.041	112.628	99.1678	208.353	196.951	175.049	0.849916	1.89847e-06
Rnf114	1336.07	1242.86	1280.83	2549.93	2428.72	1522.17	0.752054	1.91199e-06
Hcfc2	743.299	729.121	742.193	1192.77	1217.88	903.787	0.581507	1.9191e-06
Gm36582	28.0294	32.603	36.5355	97.4862	88.4268	65.6435	1.372	1.95921e-06
H2-Q4	1685.92	1691.4	1769.36	7084.96	6231.07	3094.76	1.67292	1.9616e-06
Cep97	97.5839	123.496	122.133	208.353	263.271	186.466	0.93779	2.04382e-06
Zfp951	56.0588	67.1819	76.2026	131.893	131.635	138.898	1.01294	2.0514e-06
Gm26799	26.9913	48.4105	38.6232	88.8845	94.4559	97.0382	1.29519	2.10577e-06
Epha2	11545	10584.1	10922	19851.8	18040.1	13350.4	0.632633	2.12645e-06
P2rx7	373.726	381.356	395.627	2336.8	2019.75	785.819	2.15989	2.17869e-06
Siglecg	97.5839	120.532	108.563	174.902	201.975	233.082	0.900093	2.1811e-06
Stat1	1706.68	1590.63	1761.01	16103.4	15715.9	3882.48	2.81926	2.18593e-06
Havcr2	4.15251	5.92781	2.08774	21.9822	22.1067	50.4218	2.95104	2.21568e-06
Per3	235.655	312.198	329.863	423.396	554.677	883.809	1.08497	2.22785e-06
Mpv17l	74.7451	62.242	58.4568	122.336	125.606	171.244	1.10171	2.2343e-06
Gm21378	175.443	149.183	159.712	375.609	293.416	236.887	0.903784	2.33241e-06
Tigd5	50.8682	90.8931	54.2813	166.3	155.752	129.384	1.20021	2.35589e-06
H2-DMa	80.9739	80.0255	83.5097	250.406	182.883	126.53	1.19517	2.36354e-06
Rbpms	800.396	766.664	855.975	1356.21	1297.26	990.361	0.588641	2.4678e-06
Hgsnat	1084.84	1064.04	1048.05	3821.08	3466.73	1818.04	1.51009	2.47071e-06
Otogl	62.2876	49.3984	69.9394	123.291	127.616	123.676	1.04619	2.63599e-06
Cnksr1	33.2201	35.5669	32.36	102.265	86.4171	66.5948	1.33478	2.64506e-06
Clybl	134.956	164.003	153.449	233.202	272.314	258.769	0.755441	2.71767e-06
Zfp945	321.819	297.379	351.785	510.369	517.498	442.38	0.598815	2.72696e-06
Whamm	249.15	230.197	275.582	626.015	562.716	321.558	1.00046	2.76246e-06
Mx1	23.8769	39.5188	41.7549	879.288	883.263	97.9896	4.14503	2.80018e-06
Il15ra	7.26689	9.87969	7.3071	46.8316	48.2328	22.8325	2.26501	2.80847e-06
Wdr37	637.41	559.19	623.191	1090.51	957.622	766.792	0.629491	2.81911e-06
Cd274	128.728	96.8209	115.87	2638.82	2316.18	287.309	3.94064	2.8568e-06
Pak3	232.54	248.968	213.994	358.405	371.794	615.527	0.952354	2.94426e-06
Srp54c	417.327	450.514	405.022	917.517	850.103	522.294	0.846869	2.96548e-06
Gch1	3136.18	2522.28	2823.67	4945.99	4832.32	3428.68	0.638824	2.98547e-06
Epb41l5	207.625	202.534	217.125	386.122	439.119	282.552	0.82004	3.04581e-06
Lig4	173.367	209.449	170.151	427.219	446.153	245.45	1.01574	3.06406e-06
Tmem50b	176.482	169.931	175.37	426.263	396.916	228.325	1.01069	3.10846e-06
Cnbd2	44.6394	35.5669	54.2813	104.176	93.451	105.6	1.17579	3.11907e-06
Gbp7	318.705	264.776	254.705	3281.08	3048.71	662.143	3.06035	3.11968e-06
Serpinb9d	2.07625	3.95188	4.17549	17.2035	25.1212	39.0056	2.99302	3.20168e-06
Cstf3	775.481	762.712	770.377	1556.91	1501.25	907.593	0.780462	3.2796e-06
Ccl4	2.07625	0	2.08774	17.2035	30.1455	19.9785	4.03451	3.28579e-06
Pyhin1	11.4194	6.91578	2.08774	45.8759	48.2328	22.8325	2.51518	3.28913e-06
Lrrcc1	524.254	599.697	599.182	778.934	802.875	1019.85	0.594477	3.29067e-06
Uba7	255.379	259.836	317.337	622.192	537.595	367.223	0.875208	3.36099e-06
Gm35062	10.3813	1.97594	3.13161	21.9822	40.194	38.0542	2.70149	3.43387e-06
Anpep	513.873	542.395	484.356	734.014	762.681	1233.91	0.825803	3.50632e-06
Arf2	1411.85	1417.74	1388.35	1831.21	1947.4	2716.12	0.622824	3.55348e-06
Gm40007	316.629	275.643	278.714	475.962	578.794	393.861	0.733552	3.5797e-06
Rab20	3.11438	6.91578	10.4387	47.7874	54.2619	19.0271	2.56353	3.60025e-06
Ifit3b	46.7157	40.5067	37.5794	542.865	495.391	102.746	3.19255	3.64601e-06
C130026I21Rik	152.605	163.015	183.721	279.078	355.717	249.255	0.823471	3.64862e-06
Pax5	0	0	0	12.4247	23.1115	7.61084	6.25305	3.74653e-06
Fstl1	129.766	157.087	123.177	207.397	264.276	256.866	0.827754	3.75498e-06
Stat2	954.038	912.883	1008.38	11563.6	11262.4	2200.48	3.12167	3.76496e-06
Unc119	193.092	241.064	183.721	328.777	320.547	359.612	0.706476	3.78784e-06
Gm3414	193.092	277.619	278.714	413.839	431.081	398.618	0.729946	3.88705e-06
Pnpla2	362.306	434.706	417.549	735.925	801.87	513.732	0.755694	3.91124e-06
Tbc1d17	488.958	573.022	570.998	1095.29	946.569	681.17	0.7375	3.94794e-06
Zdhhc15	21.8007	17.7834	31.3161	105.132	102.495	41.8596	1.81657	4.06214e-06
Diaph2	874.103	756.784	839.273	1584.63	1490.19	986.555	0.717376	4.11646e-06
Nampt	2302.56	2303.94	2215.1	4013.18	3777.23	2657.13	0.614912	4.1182e-06
Ifi30	260.57	386.296	347.609	684.315	611.954	460.456	0.820273	4.33593e-06
Mirt1	173.367	207.473	188.941	351.715	349.688	264.477	0.760467	4.43026e-06
Slc25a53	62.2876	66.1939	45.9303	124.247	124.601	113.211	1.05192	4.52115e-06
Ptpre	1159.59	962.282	1101.28	1966.93	1958.45	1284.33	0.692749	4.53704e-06
Zfp654	298.98	281.571	389.364	523.75	465.246	616.478	0.728036	4.54003e-06
Tubb4a	15.5719	24.6992	32.36	58.3006	68.3298	81.8165	1.52138	4.71485e-06
Arhgap26	474.424	489.045	494.795	760.775	820.962	606.964	0.58541	4.80496e-06
Mfsd11	427.708	478.177	426.943	842.969	778.759	553.689	0.706367	4.80976e-06
Dcun1d4	235.655	175.858	216.081	533.307	560.706	263.525	1.11317	4.82788e-06
Plin4	55.0207	69.1578	67.8517	115.645	128.621	234.985	1.31965	4.84856e-06
Arhgap31	475.462	542.395	470.786	959.57	978.724	605.062	0.772258	4.87255e-06
Tec	2.07625	1.97594	6.26323	22.9379	21.1018	32.3461	2.89843	4.94126e-06
Pde2a	1.03813	3.95188	2.08774	43.0086	22.1067	13.319	3.45903	4.96058e-06
Lif	1272.74	1331.78	1367.47	2928.41	2786.45	5316.17	1.47366	5.00006e-06
Sp4	95.5076	99.7848	69.9394	159.61	157.761	228.325	1.0404	5.08078e-06
Gm32287	128.728	119.544	136.747	212.176	205.994	314.898	0.930095	5.2217e-06
Cldn18	3.11438	0.987969	0	37.2741	9.04365	29.492	4.2133	5.22502e-06
Hoga1	65.402	81.0134	80.3781	153.875	141.684	136.044	0.927766	5.29928e-06
Gm36193	0	0.987969	0	25.8052	14.0679	22.8325	5.83543	5.36366e-06
Trp53inp1	361.268	343.813	383.101	840.102	714.448	446.185	0.878616	5.38055e-06
Coro2a	617.685	689.602	659.727	1079.04	1105.33	798.187	0.600147	5.39393e-06
Gpr146	28.0294	33.5909	37.5794	75.504	93.451	71.3516	1.27537	5.55362e-06
Cd40	0	0	0	8.60173	19.0921	11.4163	6.11187	5.65388e-06
H2-T10	116.27	84.9653	115.87	273.344	268.295	150.314	1.12624	5.66558e-06
Tle4	195.168	177.834	162.844	441.555	369.785	237.839	0.969163	5.67227e-06
Zbp1	152.605	119.544	180.59	1093.38	1035	330.12	2.44115	5.67377e-06
Adal	230.464	221.305	226.52	344.069	335.62	337.731	0.585184	5.84735e-06
Ifit1	423.556	372.464	412.329	5423.87	5294.55	900.933	3.26543	5.89444e-06
1700049G17Rik	99.6602	140.292	134.659	206.441	216.043	259.72	0.864288	5.91978e-06
Gm7538	0	0	1.04387	14.3362	18.0873	30.4434	5.83822	6.04567e-06
Gm35048	28.0294	48.4105	30.2723	81.2385	78.3783	184.563	1.68796	6.05059e-06
Serpine1	1126.37	1139.13	1072.06	2188.66	2249.86	3908.17	1.32244	6.17171e-06
Grina	7371.74	6794.26	7572.24	13542	13100.2	8419.49	0.689657	6.18296e-06
Zfp53	270.951	301.33	311.074	401.414	448.163	475.677	0.585059	6.26674e-06
Shpk	116.27	142.268	134.659	233.202	203.985	230.228	0.76313	6.27229e-06
Cd247	212.816	207.473	200.423	319.22	328.586	301.58	0.612759	6.30496e-06
Fbxw10	6.22876	1.97594	2.08774	30.5839	29.1406	17.1244	2.90589	6.36e-06
Gm6634	267.837	212.413	250.529	405.237	427.061	338.682	0.680556	6.36328e-06
Parvg	46.7157	29.6391	33.4039	185.415	200.97	44.7137	1.97389	6.40452e-06
Itga2b	56.0588	32.603	38.6232	88.8845	98.4753	108.454	1.21881	6.49376e-06
Jup	246.036	277.619	259.924	453.024	476.299	342.488	0.697932	6.51613e-06
Nudt22	76.8214	106.701	83.5097	182.548	152.737	168.39	0.91423	6.56684e-06
Ifih1	870.988	684.662	762.026	6388.22	6637.03	1642.99	2.66195	6.5805e-06
Gm8995	1424.31	1033.42	1338.24	5437.25	4936.83	2336.53	1.74352	6.60903e-06
1700001L05Rik	42.5632	44.4586	56.3691	140.495	146.708	75.157	1.33727	6.69834e-06
Abhd2	1367.21	1320.91	1299.62	2380.77	2249.86	1543.1	0.630477	7.07975e-06
Tbl1xr1	1028.78	1524.44	1361.21	1727.99	2100.14	2523.94	0.698271	7.17931e-06
Gm4221	39.4488	36.5548	34.4478	95.5747	97.4704	67.5462	1.23755	7.37465e-06
Tmod1	264.722	233.161	230.696	360.317	380.838	354.855	0.589116	7.72578e-06
Gm40723	76.8214	77.0616	72.0271	149.097	124.601	151.265	0.912105	7.73633e-06
A530046M15Rik	18.6863	14.8195	9.39484	32.4954	49.2376	102.746	2.10447	7.78948e-06
Zmynd15	0	0	0	14.3362	6.0291	18.0757	6.09222	7.86884e-06
Spty2d1	1526.05	1407.86	1393.57	2833.79	2639.74	1650.6	0.719134	8.11198e-06
Ccdc88b	16.61	13.8316	5.21936	72.6368	54.2619	28.5406	2.12128	8.2119e-06
Ifit1bl2	21.8007	7.90375	16.7019	214.087	214.033	48.5191	3.36212	8.21843e-06
Carhsp1	4018.59	3531.99	3870.68	6440.78	6282.32	4435.22	0.587186	8.33579e-06
Bach2	24.915	40.5067	30.2723	78.3713	92.4462	67.5462	1.31279	8.72008e-06
Isg15	700.735	642.18	680.604	3458.85	3172.31	1234.86	1.95876	8.80334e-06
Trp53inp2	164.024	166.967	131.528	284.813	254.227	235.936	0.743956	8.97419e-06
Gm1045	7.26689	13.8316	13.5703	33.4512	47.2279	43.7623	1.84054	9.00101e-06
Me3	207.625	167.955	169.107	302.016	320.547	265.428	0.70515	9.01792e-06
Syk	119.385	143.255	149.274	260.919	194.941	309.19	0.893877	9.44761e-06
N4bp2l1	14.5338	22.7233	17.7458	64.9908	66.3201	39.0056	1.62684	9.68883e-06
Msantd1	21.8007	10.8677	10.4387	105.132	87.4219	21.8812	2.31558	9.88375e-06
Hipk2	947.81	1020.57	1036.56	1737.55	1763.51	1164.46	0.634513	1.01556e-05
Wsb2	1942.33	1650.9	1683.76	3242.85	2893.97	2068.25	0.636803	1.01963e-05
Rgs20	175.443	196.606	185.809	313.485	264.276	300.628	0.655062	1.02664e-05
Herc6	650.905	599.697	660.771	3072.73	3004.5	1146.38	1.91811	1.03516e-05
Parp9	562.665	526.587	603.358	3319.31	3234.61	1068.37	2.17098	1.0449e-05
D430020J02Rik	177.52	164.003	167.019	237.025	284.373	316.801	0.721114	1.05138e-05
Nf1	2045.11	1882.08	1995.88	3516.19	3425.53	2254.71	0.634696	1.06529e-05
Mitd1	541.902	521.648	582.48	860.173	1010.88	675.462	0.629294	1.14755e-05
Caap1	209.702	248.968	201.467	360.317	339.639	322.509	0.630224	1.14951e-05
Grhl2	3.11438	2.96391	4.17549	51.6104	41.1988	6.65948	3.27934	1.15351e-05
Gm14253	103.813	96.8209	86.6413	187.326	205.994	143.655	0.901459	1.15695e-05
Numb	601.075	569.07	591.875	1188.95	1127.44	680.219	0.765988	1.16469e-05
Gm38563	67.4782	78.0495	87.6852	133.805	137.664	192.174	0.99204	1.21835e-05
Gm7984	92.3933	74.0977	83.5097	215.999	155.752	133.19	1.01517	1.21903e-05
Fst	307.285	279.595	246.354	457.803	411.988	391.958	0.598575	1.23836e-05
Nov	15.5719	9.87969	12.5265	56.3891	34.1649	39.9569	1.78498	1.24354e-05
Tcf7l2	265.76	262.8	240.09	363.184	365.765	422.402	0.582983	1.28399e-05
Gm13073	205.549	173.883	203.555	311.574	282.363	461.407	0.857217	1.32143e-05
Gm35266	200.358	134.364	133.616	280.99	245.183	453.796	1.06611	1.33106e-05
Zfpm1	148.452	155.111	116.914	307.751	306.479	191.222	0.936692	1.3448e-05
Dpep2	154.681	151.159	138.835	278.122	231.115	223.568	0.720716	1.36628e-05
Cmpk2	80.9739	70.1458	115.87	2063.46	2097.12	185.514	4.02496	1.39204e-05
Lin52	161.948	160.051	145.098	391.856	372.799	193.125	1.03546	1.46828e-05
Cage1	18.6863	9.87969	12.5265	48.7431	44.2134	39.0056	1.68663	1.47331e-05
Tmem132b	4.15251	2.96391	3.13161	57.3448	23.1115	10.4649	3.15154	1.47607e-05
Cpa2	5.19063	3.95188	6.26323	27.7167	24.1164	25.6866	2.33574	1.51321e-05
Gm19600	6.22876	16.7955	10.4387	36.3184	44.2134	39.9569	1.84091	1.62227e-05
2021-03-05	2837.2	2631.95	2818.45	4944.08	4606.23	3133.76	0.613978	1.62337e-05
Slfn4	5.19063	0.987969	5.21936	40.1414	51.2473	8.56219	3.14087	1.63318e-05
Slfn2	50.8682	61.2541	59.5007	363.184	379.833	112.26	2.31686	1.65483e-05
Smu1	1725.37	1550.12	1512.57	2788.87	2622.66	1838.97	0.598588	1.65822e-05
Perm1	113.156	86.9413	113.782	327.821	314.518	127.482	1.29452	1.68788e-05
Aqp3	0	0	0	9.55747	3.01455	29.492	6.22214	1.69669e-05
Brdt	131.842	152.147	160.756	211.22	272.314	453.796	1.07582	1.70456e-05
Chst15	164.024	181.786	158.668	378.476	408.974	209.298	0.981593	1.71322e-05
Sik3	1297.66	1296.22	1281.87	2301.44	2132.29	1471.75	0.607485	1.75034e-05
1700019B03Rik	0	0	0	11.469	17.0824	5.70813	5.92063	1.76826e-05
Narf	120.423	147.207	127.352	210.264	210.014	344.39	0.953021	1.77093e-05
Fam214b	211.778	208.461	229.652	398.547	373.804	282.552	0.698791	1.79569e-05
Samd9l	1428.46	1319.93	1683.76	6424.53	6377.78	2575.32	1.79476	1.80736e-05
9330159M07Rik	25.9532	16.7955	38.6232	65.9466	60.291	136.044	1.69254	1.88187e-05
Gm19412	38.4107	39.5188	35.4916	131.893	140.679	52.3245	1.51704	1.90456e-05
LOC105244914	15.5719	15.8075	9.39484	46.8316	40.194	40.9083	1.64739	1.94928e-05
Fam210b	228.388	229.209	206.687	406.193	392.896	285.406	0.706563	2.02631e-05
S100a3	103.813	70.1458	85.5975	171.079	134.65	211.201	0.996063	2.04486e-05
Cdc20b	2.07625	0	0	20.0707	18.0873	19.9785	4.82735	2.06074e-05
Tnfsf9	72.6689	82.0014	73.071	124.247	143.694	148.411	0.869414	2.07831e-05
Arid3b	58.1351	46.4345	59.5007	128.07	120.582	90.3787	1.04811	2.08804e-05
Serpinb2	4.15251	3.95188	5.21936	38.2299	30.1455	13.319	2.61741	2.1095e-05
Gdf15	17.6482	10.8677	27.1407	60.2121	50.2425	53.2759	1.56242	2.11238e-05
Brwd3	283.409	331.958	319.425	497.944	501.42	402.423	0.58388	2.18116e-05
Ecscr	90.317	70.1458	100.212	134.76	174.844	186.466	0.929651	2.22532e-05
Cep70	195.168	232.173	224.432	310.618	322.557	420.499	0.692993	2.2454e-05
Ssr1	3737.26	4012.14	3812.22	7010.41	6584.78	4312.49	0.631187	2.27868e-05
Fuca2	196.206	177.834	187.897	278.122	270.305	321.558	0.63139	2.28189e-05
5033406O09Rik	104.851	98.7969	106.475	155.787	189.917	186.466	0.779073	2.29066e-05
Amn1	162.986	152.147	159.712	219.822	263.271	343.439	0.800071	2.30565e-05
Mir22hg	145.338	134.364	153.449	208.353	234.13	285.406	0.749618	2.30721e-05
Ifit3	57.097	54.3383	81.422	944.278	760.671	135.092	3.25427	2.34634e-05
Ifi204	1716.02	1351.54	1578.33	6163.61	6065.27	2600.05	1.67439	2.35913e-05
Atf3	24.915	14.8195	12.5265	50.6546	70.3395	40.9083	1.63098	2.4009e-05
Art5	5.19063	8.89172	8.35097	26.7609	27.1309	39.0056	2.04837	2.41555e-05
AA414768	469.233	514.732	481.225	636.528	687.317	942.793	0.629524	2.43941e-05
Tspan31	3088.43	2753.47	2978.17	5130.45	5059.42	3301.2	0.613128	2.4523e-05
Gfpt1	2509.15	2229.85	2292.34	4326.67	4099.79	2617.18	0.651319	2.49441e-05
Arntl	1714.99	1435.52	1566.85	2730.57	2697.02	1794.26	0.614383	2.54147e-05
Bcl2l15	24.915	25.6872	29.2284	78.3713	68.3298	51.3732	1.3112	2.57122e-05
Galc	277.18	300.343	259.924	518.015	544.629	342.488	0.745896	2.58121e-05
Zfp81	189.977	212.413	243.222	411.927	372.799	285.406	0.728985	2.62518e-05
Cyp3a13	23.8769	24.6992	16.7019	51.6104	62.3007	55.1786	1.37043	2.63654e-05
Bmp6	23.8769	45.4466	46.9742	82.1943	87.4219	103.698	1.23166	2.64112e-05
Letm2	51.9063	28.6511	50.1058	93.6632	83.4025	139.849	1.28183	2.71495e-05
Cish	7.26689	5.92781	7.3071	26.7609	33.16	25.6866	2.06294	2.71668e-05
Trio	5795.86	5548.43	6026.27	11062.8	10325.8	6411.18	0.678421	2.74467e-05
Ppp4r1l-ps	240.845	249.956	239.047	334.512	359.736	499.461	0.710003	2.7744e-05
Gm30091	7.26689	4.93984	7.3071	25.8052	26.1261	31.3947	2.09873	2.82188e-05
Myo5c	17.6482	15.8075	14.6142	51.6104	52.2522	36.1515	1.54149	2.84758e-05
Apol9b	1776.23	1444.41	1840.35	5392.33	4945.87	2649.52	1.35967	2.92916e-05
Ehd4	2714.7	2799.9	2612.81	4876.22	4630.35	3006.28	0.622474	2.94827e-05
Hsh2d	1.03813	0.987969	1.04387	33.4512	31.1503	3.80542	4.47721	2.99882e-05
Krt20	216.968	252.92	219.213	331.644	327.581	440.477	0.674204	3.07521e-05
Pcdh15	11.4194	8.89172	6.26323	38.2299	38.1843	24.7352	1.92689	3.126e-05
Gm40275	6.22876	14.8195	12.5265	28.6724	50.2425	41.8596	1.84167	3.13312e-05
Pgap1	320.781	377.404	318.381	530.44	582.813	431.915	0.603051	3.1346e-05
Piwil4	48.7919	64.218	62.6323	119.468	124.601	99.8923	0.968175	3.14201e-05
Vhl	978.953	919.799	928.002	1665.87	1514.31	1075.98	0.590341	3.28313e-05
Snhg18	225.273	214.389	176.414	304.883	299.445	372.931	0.665656	3.29918e-05
B4galt5	801.434	829.894	799.606	1431.71	1385.69	918.058	0.619564	3.31215e-05
Cbwd1	584.465	476.201	510.453	895.535	890.297	628.846	0.62005	3.32834e-05
Ppef1	776.519	608.589	704.613	1290.26	1406.79	799.138	0.742452	3.37207e-05
Prdm9	95.5076	99.7848	97.0801	150.052	191.926	163.633	0.789178	3.38127e-05
Gm16845	14.5338	15.8075	10.4387	48.7431	36.1746	39.9569	1.61291	3.41909e-05
Shisa5	2216.4	2139.94	2264.16	5702.94	5313.65	3126.15	1.09504	3.42969e-05
Gm36841	4.15251	3.95188	12.5265	52.5661	42.2037	16.173	2.43223	3.4513e-05
Ovgp1	65.402	72.1217	90.8168	144.318	153.742	125.579	0.891747	3.49097e-05
Lsm10	216.968	205.498	268.275	393.768	370.79	316.801	0.647191	3.56038e-05
Tmem156	28.0294	39.5188	33.4039	70.7253	93.451	67.5462	1.19559	3.56211e-05
Fam43a	70.5926	87.9292	64.72	151.964	146.708	119.871	0.904732	3.57809e-05
Cyp4f13	169.215	194.63	174.327	349.804	305.474	237.839	0.730118	3.58238e-05
Mmp9	1.03813	6.91578	3.13161	22.9379	23.1115	21.8812	2.6008	3.59449e-05
Klhdc9	52.9445	43.4706	54.2813	104.176	95.4607	97.0382	0.978986	3.61654e-05
Gm31342	6.22876	12.8436	9.39484	29.6282	33.16	39.9569	1.84707	3.6762e-05
Scfd1	1079.65	970.185	966.625	1796.81	1680.11	1139.72	0.613919	3.6817e-05
Tal2	0	0	0	6.69023	20.097	5.70813	5.84306	3.69323e-05
Celsr1	18.6863	8.89172	6.26323	35.3627	48.2328	37.1028	1.83545	3.71809e-05
LOC108168045	22.8388	34.5789	22.9652	67.8581	50.2425	97.9896	1.42534	3.8286e-05
Atp13a4	0	1.97594	0	42.0529	31.1503	2.85406	5.22618	3.9411e-05
Gbp9	153.643	116.58	165.976	1138.3	1113.37	273.99	2.53369	3.95271e-05
Gm6395	57.097	57.3022	59.5007	120.424	102.495	105.6	0.918283	4.01913e-05
1700031A10Rik	29.0675	16.7955	31.3161	60.2121	53.257	106.552	1.5157	4.02537e-05
Ceacam19	0	0	0	8.60173	14.0679	6.65948	5.69658	4.06268e-05
4930543E12Rik	4.15251	0.987969	3.13161	16.2477	24.1164	19.0271	2.85404	4.15938e-05
Elf3	4.15251	1.97594	1.04387	19.1149	32.1552	11.4163	3.12665	4.17076e-05
LOC108167381	12.4575	3.95188	8.35097	35.3627	27.1309	34.2488	1.97436	4.19468e-05
Mafk	2011.89	1704.25	1869.57	5140.01	4674.56	2711.36	1.16511	4.20272e-05
Csf3	3.11438	0	4.17549	20.0707	28.1358	13.319	3.09356	4.22155e-05
Star	59.1732	48.4105	51.1497	194.017	158.766	66.5948	1.40166	4.28693e-05
Sdccag8	148.452	218.341	209.818	283.857	313.513	363.418	0.736082	4.31636e-05
Rbpms2	635.333	649.095	620.06	1181.3	1058.11	725.884	0.638588	4.33502e-05
Zfp944	237.731	228.221	221.301	363.184	378.828	297.774	0.596881	4.34042e-05
Prdm1	1.03813	8.89172	2.08774	21.9822	20.097	35.2001	2.66774	4.41915e-05
Tgtp2	92.3933	83.9773	76.2026	699.607	769.715	155.071	2.68505	4.42519e-05
Rasgrf2	0	0	0	20.0707	13.063	1.90271	5.95501	4.59893e-05
G930009F23Rik	78.8976	98.7969	108.563	160.566	156.757	401.472	1.32875	4.60847e-05
Ccdc15	166.1	214.389	187.897	259.963	315.523	328.217	0.667982	4.6137e-05
Gm40156	23.8769	10.8677	19.8336	64.9908	42.2037	50.4218	1.53563	4.63635e-05
Tor1aip2	2895.34	2789.04	2824.72	11496.7	11035.3	4498.96	1.66753	4.66593e-05
Etv1	253.303	350.729	236.959	407.148	461.226	462.359	0.66078	4.69764e-05
Ccdc28a	124.575	144.243	148.23	197.84	226.091	278.747	0.752675	4.71063e-05
4930565N06Rik	26.9913	17.7834	22.9652	59.2563	50.2425	58.984	1.31786	4.72372e-05
Fchsd1	271.989	329.982	325.688	499.856	576.784	389.104	0.6592	4.85137e-05
Gm35746	3.11438	12.8436	11.4826	39.1856	35.1697	30.4434	1.92826	4.87387e-05
Pde8b	14.5338	19.7594	15.6581	39.1856	48.2328	50.4218	1.46164	5.01812e-05
Pqlc2	76.8214	86.9413	93.9484	194.972	215.038	114.163	1.02345	5.08652e-05
Hspa5	64944.2	46790.2	54949.4	128398	116661	66018.3	0.900161	5.09613e-05
Isg20	314.552	261.812	321.512	1079.99	989.777	471.872	1.50122	5.14288e-05
Nlrc5	655.058	507.816	612.753	2398.93	2380.49	966.577	1.69425	5.17146e-05
B3gat2	529.445	510.78	490.62	895.535	851.108	590.791	0.610368	5.25666e-05
Gdpd5	98.622	86.9413	90.8168	140.495	155.752	187.417	0.808079	5.37245e-05
Gm29787	5.19063	8.89172	4.17549	25.8052	28.1358	24.7352	2.09929	5.49345e-05
Ccpg1os	8.30501	9.87969	10.4387	37.2741	33.16	27.5893	1.77537	5.51053e-05
Rnf19b	736.032	757.772	686.867	2539.42	2493.03	1113.09	1.49472	5.53539e-05
Spsb1	137.033	132.388	172.239	254.229	214.033	247.352	0.697625	5.56855e-05
Gpd1l	374.764	557.214	400.847	676.669	657.172	680.219	0.594778	5.68802e-05
Acpp	5.19063	5.92781	5.21936	30.5839	33.16	15.2217	2.26991	5.69681e-05
Gm42166	77.8595	91.8811	62.6323	126.159	138.669	176.952	0.925669	5.72134e-05
Tmem169	1.03813	0	4.17549	16.2477	25.1212	13.319	3.40979	5.74208e-05
Cda	95.5076	87.9292	104.387	146.229	191.926	160.779	0.793575	5.82726e-05
Gm16589	156.757	148.195	122.133	259.963	289.397	191.222	0.793116	5.9772e-05
Tdp2	607.304	667.867	617.972	1225.27	994.801	733.495	0.641506	5.97963e-05
Hspa9	44608.3	40565	40965.7	73691.9	70276.2	49149.9	0.614467	5.9975e-05
Gm12963	21.8007	31.615	27.1407	52.5661	58.2813	103.698	1.41261	6.14755e-05
LOC102639453	1.03813	0	2.08774	9.55747	15.0727	27.5893	4.08506	6.16805e-05
LOC102634900	1.03813	4.93984	8.35097	14.3362	22.1067	62.7894	2.79358	6.22839e-05
Gm41719	41.5251	21.7353	36.5355	104.176	99.4801	54.2272	1.37175	6.26267e-05
Tbx3os2	0	0	0	2.86724	6.0291	25.6866	5.93878	6.30634e-05
Gsg1	28.0294	16.7955	26.0968	49.6989	52.2522	95.1355	1.47833	6.36648e-05
Dntt	0	0	0	13.3805	14.0679	2.85406	5.74426	6.37687e-05
H2-Q1	233.578	138.316	234.871	453.98	457.207	266.379	0.957245	6.49008e-05
Gm34891	3.11438	3.95188	5.21936	17.2035	20.097	28.5406	2.4238	6.71685e-05
Vcpip1	1989.05	1939.38	2020.94	3513.33	3312.99	2156.72	0.59442	6.77197e-05
Zeb2os	26.9913	39.5188	27.1407	53.5219	76.3686	105.6	1.32815	6.78543e-05
Acad11	166.1	164.003	176.414	309.662	351.697	211.201	0.784096	6.87415e-05
Ttll7	106.927	107.689	85.5975	164.389	170.824	166.487	0.739882	7.2136e-05
Atp6v0c-ps2	1617.4	1407.86	1509.44	2960.91	2496.05	1663.92	0.651064	7.29776e-05
Mcoln3	0	0	0	10.5132	7.03395	8.56219	5.53251	7.35408e-05
Irf5	29.0675	47.4225	45.9303	127.114	127.616	58.0327	1.35148	7.40833e-05
Ascc3	2156.19	1813.91	1990.66	5942.84	5852.25	2911.15	1.30286	7.61148e-05
Lipt1	133.918	160.051	128.396	285.768	243.174	191.222	0.76884	7.66259e-05
Rilpl1	237.731	194.63	249.485	355.538	356.722	312.044	0.587871	7.78692e-05
Gm7609	151.566	181.786	227.564	900.314	763.686	320.607	1.82299	8.04731e-05
Serpinb6b	14.5338	16.7955	21.9213	60.2121	50.2425	36.1515	1.4617	8.25333e-05
Clec2d	107.965	87.9292	77.2465	163.433	201.975	136.044	0.875621	8.26016e-05
Irf8	5.19063	8.89172	8.35097	20.0707	38.1843	30.4434	1.97906	8.44842e-05
Trex1	174.405	145.231	148.23	486.475	381.843	168.39	1.14782	8.4823e-05
Igtp	278.218	224.269	310.03	3414.89	2966.32	454.748	3.0727	8.4841e-05
Cyp26a1	0	1.97594	0	26.7609	23.1115	5.70813	4.77087	8.6968e-05
Dgkh	83.0501	59.2781	107.519	212.176	237.145	111.309	1.16675	8.83482e-05
Gm32322	50.8682	84.9653	77.2465	117.557	130.63	187.417	1.03089	8.95774e-05
Ppp3ca	5771.98	4901.31	4887.41	9559.39	9703.84	5568.28	0.674248	9.03358e-05
Enkur	36.3344	33.5909	19.8336	65.9466	56.2716	115.114	1.40272	9.21892e-05
Dync1h1	11751.6	11311.3	10882.4	22737.2	20119.1	12116.5	0.695502	9.53408e-05
Sp100	845.035	761.724	930.09	3189.33	3061.78	1295.75	1.57284	9.55286e-05
Gm29998	10.3813	8.89172	8.35097	21.0264	30.1455	55.1786	1.94609	9.60704e-05
9930111J21Rik2	33.2201	28.6511	37.5794	74.5483	84.4074	58.984	1.13236	9.61796e-05
Gm6485	129.766	126.46	111.694	191.149	178.863	286.358	0.835612	9.66138e-05
Ahcyl2	966.496	966.233	905.037	1708.88	1658	1024.61	0.629781	9.68808e-05
A330035P11Rik	26.9913	26.6752	34.4478	55.4333	68.3298	73.2543	1.16192	9.81926e-05
Parp12	1182.43	1012.67	1296.49	6288.82	6067.28	1894.15	2.02904	9.89682e-05
Tmem184b	1978.67	2053	2065.82	5044.43	5017.22	2768.44	1.07322	9.95135e-05
9430091E24Rik	30.1057	19.7594	25.0529	63.0793	72.3492	46.6164	1.2819	0.000100271
Gm39668	76.8214	59.2781	76.2026	119.468	114.553	188.368	0.994445	0.000100495
Oas1b	302.095	328.006	352.829	1221.45	1254.05	500.413	1.59812	0.000102953
Gramd1c	7.26689	3.95188	10.4387	46.8316	33.16	16.173	2.15642	0.000103146
Gm7582	168.177	152.147	185.809	890.757	814.933	273.039	1.96701	0.000105609
2310001H17Rik	7.26689	3.95188	12.5265	26.7609	37.1794	26.6379	1.93776	0.000106649
1110046J04Rik	58.1351	43.4706	46.9742	125.203	82.3977	94.1841	1.02422	0.00010681
Sp140	927.047	617.48	939.484	1996.56	2072	1289.09	1.10902	0.000108097
Sh3gl3	224.235	141.28	129.44	243.716	290.402	415.742	0.941014	0.000109055
Atrip	413.174	368.512	368.487	745.483	712.439	430.012	0.714793	0.000111849
Dhx58	234.617	187.714	245.31	1035.07	1004.85	357.709	1.84452	0.000111971
Gm41696	11.4194	25.6872	28.1845	53.5219	63.3055	53.2759	1.37926	0.000112137
Zan	13.4956	0.987969	9.39484	33.4512	28.1358	39.9569	2.09963	0.000113104
Slc39a4	1.03813	0.987969	4.17549	14.3362	13.063	24.7352	3.08429	0.000113585
Gm33602	5.19063	6.91578	5.21936	23.8937	18.0873	32.3461	2.09981	0.000115436
Fyco1	214.892	275.643	329.863	369.874	437.11	530.856	0.705647	0.000116251
Spp1	42349.3	35455.2	39675.5	66331.7	69291.4	45158	0.621828	0.000117835
Asap3	24.915	31.615	28.1845	72.6368	74.3589	48.5191	1.20435	0.000123036
Gm18541	57.097	41.4947	34.4478	101.309	115.558	71.3516	1.11461	0.000124263
Natd1	260.57	224.269	287.065	924.208	737.56	393.861	1.41318	0.000124644
Mturn	12.4575	29.6391	10.4387	58.3006	43.2085	54.2272	1.56121	0.000124744
Tlcd2	3.11438	3.95188	7.3071	31.5397	22.1067	16.173	2.28386	0.000124847
Gm31416	3.11438	0.987969	1.04387	15.292	11.0533	21.8812	3.2373	0.000125158
Slfn10-ps	14.5338	15.8075	24.009	54.4776	70.3395	32.3461	1.53178	0.000125289
Olfr56	10.3813	12.8436	19.8336	62.1236	80.388	19.9785	1.91566	0.000126011
Ralgps2	46.7157	38.5308	52.1936	83.15	97.4704	87.5247	0.965409	0.000126045
Pygm	16.61	17.7834	6.26323	82.1943	62.3007	19.9785	2.01287	0.000126448
Gpcpd1	627.028	617.48	609.621	769.377	861.156	1447.01	0.731211	0.000130205
Map4k3	552.283	476.201	553.252	1030.3	967.671	577.472	0.703319	0.000130741
Cpeb1	32.1819	35.5669	21.9213	82.1943	86.4171	48.5191	1.27284	0.000130748
Slc31a2	156.757	166.967	156.581	227.468	233.125	264.477	0.594064	0.000135834
Tor3a	2769.72	2506.48	2634.73	13073.7	12622.9	4065.14	1.91154	0.000136475
Procr	600.037	422.851	493.751	974.862	910.394	586.035	0.704539	0.000137051
Gm39584	8.30501	12.8436	7.3071	29.6282	27.1309	38.0542	1.73226	0.000137654
A430033K04Rik	65.402	87.9292	78.2904	130.937	135.655	134.141	0.789504	0.000138058
Gm39749	64.3638	50.3864	51.1497	200.707	203.985	56.1299	1.47362	0.000140867
Ido2	23.8769	46.4345	38.6232	58.3006	79.3831	188.368	1.58092	0.000142237
4930431P22Rik	38.4107	33.5909	38.6232	64.9908	73.354	91.3301	1.05528	0.000144623
Gm32591	5.19063	2.96391	3.13161	17.2035	25.1212	17.1244	2.39837	0.000145515
Aph1b	121.461	136.34	181.634	248.494	223.077	240.693	0.697651	0.000145533
Rbm38	535.673	559.19	551.164	1056.1	1011.88	588.889	0.690511	0.00014798
Gm10499	290.675	194.63	228.608	408.104	582.813	301.58	0.856237	0.000157633
Slc26a2	100.698	106.701	98.1239	175.858	186.902	142.703	0.725192	0.000159539
Zfp874a	124.575	130.412	102.299	190.194	199.965	179.806	0.672538	0.000160045
Arl6ip1	29.0675	39.5188	31.3161	90.796	86.4171	51.3732	1.1916	0.000162006
Pde4d	74.7451	81.0134	68.8955	137.628	115.558	134.141	0.785686	0.000162271
Copz2	127.69	153.135	116.914	193.061	205.994	240.693	0.6847	0.000167549
Gm19345	3.11438	2.96391	4.17549	17.2035	17.0824	20.9298	2.43219	0.000168279
Mettl20	38.4107	56.3142	50.1058	81.2385	92.4462	114.163	0.989761	0.00016921
Tapbp	2454.13	2525.25	2891.52	7756.85	7653.94	3701.72	1.27991	0.00017154
1810062G17Rik	19.7244	16.7955	25.0529	44.9201	43.2085	67.5462	1.34161	0.000171921
Grn	4558.41	4401.4	4790.33	11704.1	11380.9	5856.54	1.07369	0.000172164
Klhl15	98.622	111.64	101.256	183.503	192.931	142.703	0.735495	0.000174522
Islr2	1.03813	0	0	22.9379	14.0679	3.80542	5.2136	0.000175797
Ifi35	461.966	402.103	479.137	1855.11	1805.72	671.657	1.68952	0.000175968
Celf3	7.26689	11.8556	7.3071	36.3184	40.194	19.0271	1.84765	0.000176139
Zmynd12	0	1.97594	1.04387	12.4247	11.0533	19.0271	3.79768	0.000182266
Gm32725	115.232	103.737	110.65	151.964	182.883	204.541	0.710945	0.000182808
Abtb1	117.308	167.955	153.449	217.91	256.237	227.374	0.675814	0.000182961
LOC108167626	29.0675	43.4706	30.2723	84.1058	82.3977	58.0327	1.12357	0.000183402
Obscn	181.672	227.233	227.564	321.131	279.348	385.299	0.631443	0.000184022
Uso1	3651.09	3358.11	3536.64	8484.17	8173.45	4448.54	1.00098	0.000186556
Agrn	1318.42	1398.96	1533.45	3634.71	3581.29	1922.69	1.10422	0.00019021
3110062M04Rik	321.819	350.729	369.531	1900.98	1917.25	529.905	2.06091	0.00019163
Zfp87	148.452	216.365	184.765	309.662	270.305	274.942	0.636558	0.000194669
Map1lc3a	102.775	108.677	117.957	169.167	159.771	207.395	0.704067	0.000197517
Tldc2	37.3726	37.5428	39.6671	94.619	83.4025	59.9354	1.05409	0.000197874
Trim30a	929.123	877.316	1018.82	3401.5	3525.01	1370.9	1.55427	0.000199232
Dnajc17	51.9063	46.4345	57.4129	124.247	80.388	97.9896	0.960383	0.000201042
Tbx2	1.03813	1.97594	0	20.0707	13.063	9.51355	3.80194	0.000202525
Cyp26b1	61.2495	40.5067	38.6232	95.5747	109.529	78.9625	1.01701	0.000203288
Vnn3	0	0	0	10.5132	9.04365	3.80542	5.3699	0.000204052
Sema3b	67.4782	60.2661	64.72	117.557	91.4413	184.563	1.03356	0.000204943
Zfyve26	425.632	559.19	505.234	950.013	775.744	584.132	0.63213	0.000205251
Zfp346	1402.51	1323.88	1394.61	2499.28	2312.16	1441.3	0.601447	0.000207384
Mfsd12	273.027	330.97	284.977	519.927	533.575	345.342	0.653201	0.000207583
Slfn5	0	2.96391	2.08774	21.9822	29.1406	4.75677	3.45352	0.000209093
Gm42139	12.4575	5.92781	8.35097	39.1856	25.1212	26.6379	1.77157	0.000211246
D5Ertd615e	79.9357	43.4706	44.8865	228.424	181.878	60.8867	1.48575	0.000217165
Tgfb3	206.587	273.667	219.213	390.901	322.557	333.926	0.58174	0.000217343
Hspb1	3.11438	0.987969	8.35097	23.8937	23.1115	17.1244	2.37691	0.000224677
8030451A03Rik	3.11438	2.96391	1.04387	9.55747	20.097	20.9298	2.82207	0.000225623
Aif1l	3.11438	1.97594	1.04387	17.2035	15.0727	13.319	2.89355	0.000226064
Slc4a8	31.1438	44.4586	42.7987	73.5925	72.3492	94.1841	1.01963	0.000226432
Gbp4	53.9826	34.5789	56.3691	525.661	491.372	76.1084	2.91531	0.000227969
A530013C23Rik	7.26689	8.89172	5.21936	23.8937	24.1164	28.5406	1.83668	0.000229505
Zfp119a	114.194	94.845	130.484	188.282	161.781	209.298	0.722269	0.000231677
Gm33318	12.4575	18.7714	14.6142	46.8316	38.1843	36.1515	1.39959	0.000232131
1810026J23Rik	873.064	752.832	784.991	1586.54	1364.59	854.317	0.658493	0.000233815
Txndc2	1.03813	0	0	12.4247	14.0679	7.61084	4.95336	0.000233982
Hes7	79.9357	77.0616	69.9394	116.601	121.587	157.925	0.803939	0.000238415
Pdia5	118.346	141.28	110.65	256.14	200.97	168.39	0.755532	0.000238817
9030025P20Rik	74.7451	81.0134	64.72	126.159	123.597	124.627	0.762819	0.000239477
Gm35330	0	0	0	4.77874	14.0679	4.75677	5.38176	0.000239565
Srms	1.03813	0.987969	1.04387	42.0529	14.0679	1.90271	4.24143	0.000243683
Aim1l	13.4956	3.95188	5.21936	15.292	47.2279	36.1515	2.12528	0.000245131
Ttc6	9.34314	12.8436	19.8336	51.6104	38.1843	31.3947	1.52981	0.000245246
Selk	1253.02	941.534	972.888	1887.6	1748.44	1176.83	0.603607	0.000251573
Trim25	2480.08	2338.52	2601.33	11651.5	11111.6	3615.15	1.82987	0.000252897
Inca1	32.1819	29.6391	34.4478	71.6811	55.2667	73.2543	1.05848	0.000253427
Pthlh	0	1.97594	1.04387	11.469	15.0727	13.319	3.70255	0.000256617
Gm11110	56.0588	90.8931	88.7291	160.566	134.65	130.336	0.851656	0.000259449
Endod1	8.30501	12.8436	11.4826	33.4512	33.16	29.492	1.55562	0.000262969
Camta1	218.007	246.004	210.862	280.034	346.673	387.201	0.586635	0.000265802
Gtpbp10	2.07625	1.97594	4.17549	13.3805	23.1115	14.2703	2.62843	0.000267455
Angel1	51.9063	89.9052	87.6852	124.247	159.771	140.801	0.886741	0.000273497
Ly96	29.0675	51.3744	24.009	118.513	95.4607	52.3245	1.3466	0.000277882
Trpv3	29.0675	26.6752	32.36	78.3713	84.4074	42.811	1.22216	0.000277963
Fam171a2	63.3257	86.9413	68.8955	125.203	164.795	110.357	0.866638	0.000280829
Slc6a12	1.03813	1.97594	2.08774	25.8052	17.0824	5.70813	3.24891	0.00029108
Batf2	36.3344	37.5428	44.8865	301.06	359.736	59.9354	2.60132	0.000293254
Pnpt1	1330.88	1267.56	1244.29	4530.24	4251.52	1786.64	1.45954	0.000298347
Decr2	112.118	111.64	85.5975	179.681	152.737	170.293	0.700143	0.000298562
Muc2	1.03813	0.987969	1.04387	16.2477	12.0582	10.4649	3.65973	0.000298883
Gm39065	1.03813	1.97594	2.08774	23.8937	16.0776	6.65948	3.18939	0.000301371
Gm32133	18.6863	7.90375	4.17549	56.3891	58.2813	16.173	2.08878	0.000303276
1110032A03Rik	112.118	107.689	98.1239	153.875	163.791	188.368	0.670556	0.000309058
Cyp2b10	0	0	0	8.60173	9.04365	3.80542	5.24617	0.000322067
Gm38850	10.3813	1.97594	3.13161	31.5397	16.0776	24.7352	2.2331	0.000322945
Fam3b	3.11438	0	0	13.3805	20.097	8.56219	3.76934	0.000328769
Tap1	915.628	898.064	885.203	3861.22	3447.64	1275.77	1.66937	0.000329622
Gpr3	3.11438	2.96391	5.21936	22.9379	17.0824	15.2217	2.29426	0.000331292
Trim43c	6.22876	3.95188	11.4826	14.3362	31.1503	44.7137	2.06392	0.000332616
Irf1	597.961	668.855	650.332	2470.61	2443.8	899.982	1.60063	0.000339914
Cabyr	7.26689	6.91578	3.13161	37.2741	23.1115	14.2703	2.10517	0.000343489
LOC102639982	312.476	318.126	349.697	1928.7	1791.65	469.969	2.09575	0.000349724
4930547H16Rik	3.11438	0.987969	4.17549	14.3362	8.0388	37.1028	2.8577	0.000356843
Fermt3	4.15251	11.8556	8.35097	45.8759	49.2376	11.4163	2.1228	0.000359356
Gga2	432.899	417.911	481.225	734.97	829.001	487.094	0.622525	0.000359905
1700109H08Rik	66.4401	33.5909	55.3252	126.159	135.655	74.2057	1.1144	0.000364278
Gbp11	1.03813	1.97594	3.13161	30.5839	31.1503	1.90271	3.37204	0.000368292
Setdb2-phf11c	529.445	445.574	519.848	907.004	964.656	525.148	0.681027	0.000374023
Slc39a8	0	0	0	6.69023	9.04365	4.75677	5.17977	0.0003768
Gm35941	1.03813	5.92781	4.17549	10.5132	32.1552	19.9785	2.48055	0.000376848
Gm40993	0	0.987969	2.08774	10.5132	14.0679	13.319	3.62547	0.000378892
Tmem67	126.651	131.4	132.572	262.831	214.033	164.584	0.715426	0.000380792
Rps6ka1	104.851	135.352	123.177	221.733	251.212	151.265	0.779125	0.000381747
Gm28802	17.6482	11.8556	8.35097	32.4954	27.1309	56.1299	1.61449	0.000382636
A330074K22Rik	61.2495	54.3383	64.72	103.221	87.4219	176.952	1.02942	0.000386243
Slc18a1	5.19063	4.93984	1.04387	22.9379	19.0921	14.2703	2.32642	0.000386899
Gm31513	7.26689	4.93984	8.35097	25.8052	22.1067	23.7839	1.80725	0.000392196
Rnf213	9043.12	8122.09	9530.55	49936.8	48077	12605.5	2.05092	0.000393271
Orc1	87.2026	139.304	126.308	251.362	247.193	148.411	0.873534	0.000396049
LOC102635844	43.6013	42.4827	38.6232	125.203	137.664	45.665	1.30572	0.000396733
Gm9958	16.61	15.8075	27.1407	40.1414	44.2134	63.7408	1.3175	0.000398062
LOC105245043	0	0	0	9.55747	3.01455	8.56219	5.22947	0.000399889
Cep95	160.91	175.858	176.414	303.928	297.436	205.493	0.652226	0.000400288
Syn3	33.2201	34.5789	26.0968	60.2121	62.3007	68.4976	1.02333	0.000401724
Gm35063	13.4956	21.7353	18.7897	64.0351	42.2037	34.2488	1.37713	0.000402086
Parp14	692.43	651.071	867.457	4650.67	4942.86	1056	2.26805	0.000405979
Gm36153	0	0	0	9.55747	11.0533	1.90271	5.31517	0.000406777
Plet1	16.61	6.91578	17.7458	37.2741	36.1746	39.9569	1.46494	0.000407243
Ifi44l	5.19063	6.91578	8.35097	51.6104	58.2813	4.75677	2.48535	0.000409564
Gm31718	7.26689	12.8436	8.35097	21.0264	25.1212	55.1786	1.82931	0.000414039
Gm14167	21.8007	11.8556	16.7019	30.5839	44.2134	60.8867	1.43331	0.000414247
Gm6548	328.048	289.475	363.267	1371.5	1141.51	468.067	1.60385	0.000415086
Sectm1a	1.03813	0.987969	3.13161	12.4247	23.1115	8.56219	3.10156	0.000418597
Gldc	7.26689	3.95188	9.39484	23.8937	22.1067	26.6379	1.82454	0.000419005
Grk1	2.07625	3.95188	0	16.2477	29.1406	6.65948	3.09045	0.000419913
Dner	50.8682	40.5067	36.5355	78.3713	68.3298	113.211	1.02437	0.000421203
Gnb4	36.3344	47.4225	33.4039	87.9288	64.3104	79.9138	0.985371	0.000425418
F830016B08Rik	1.03813	0.987969	3.13161	34.4069	22.1067	1.90271	3.50841	0.000445173
Myo7b	1.03813	0	1.04387	6.69023	12.0582	19.9785	4.23955	0.000449003
Myh10	25.9532	25.6872	36.5355	73.5925	79.3831	44.7137	1.165	0.000450826
Ccl7	0	0	0	4.77874	5.02425	10.4649	5.16769	0.000452169
Gm33938	26.9913	29.6391	48.0181	61.1678	79.3831	78.9625	1.07012	0.000459892
Fam122b	201.397	251.932	289.152	367.963	319.542	472.823	0.644611	0.000466123
Gm7266	14.5338	3.95188	6.26323	27.7167	28.1358	28.5406	1.77614	0.000466218
Ccnk	939.505	973.149	1007.34	1749.97	1635.9	999.874	0.586745	0.000467826
LOC102635912	7.26689	3.95188	5.21936	13.3805	23.1115	31.3947	2.04999	0.000474046
Sh2d5	33.2201	21.7353	29.2284	57.3448	64.3104	55.1786	1.07268	0.000474218
Gm38687	3.11438	0.987969	2.08774	16.2477	16.0776	10.4649	2.79747	0.000476486
Gm24474	20.7625	32.603	19.8336	53.5219	52.2522	56.1299	1.14149	0.000480834
Dtx3l	530.483	520.66	572.042	2283.28	2270.96	745.862	1.70718	0.000482517
Camkk1	121.461	151.159	176.414	251.362	296.431	193.125	0.721824	0.000482911
Ceacam16	11.4194	5.92781	13.5703	26.7609	25.1212	45.665	1.66465	0.000483475
LOC108167851	18.6863	19.7594	30.2723	43.0086	45.2182	84.6706	1.33385	0.000493004
Slc23a3	12.4575	13.8316	14.6142	33.4512	48.2328	28.5406	1.42787	0.000493109
Gm6904	12.4575	23.7113	21.9213	87.9288	71.3443	22.8325	1.64632	0.000494497
Gjb4	53.9826	49.3984	54.2813	65.9466	109.529	166.487	1.11761	0.000497083
BC023105	3.11438	0.987969	2.08774	25.8052	33.16	1.90271	3.3028	0.000500826
1110059G10Rik	164.024	141.28	135.703	279.078	199.965	212.152	0.649019	0.000503562
9330198I05Rik	7.26689	12.8436	9.39484	51.6104	31.1503	18.0757	1.76969	0.000504044
Usp25	1031.9	1071.95	1089.8	2708.59	2694	1369	1.08426	0.000504671
Depdc7	110.041	132.388	94.9923	199.751	198.96	152.217	0.705531	0.000510865
Gm41293	4.15251	2.96391	8.35097	21.9822	29.1406	14.2703	2.08471	0.000525809
Pdia6	4891.65	4973.43	5030.42	9259.28	8221.68	4991.76	0.593279	0.000526192
Gm20544	115.232	140.292	135.703	170.123	201.975	333.926	0.851851	0.00052637
Gm28321	6.22876	6.91578	16.7019	29.6282	32.1552	30.4434	1.63212	0.000527881
Gm14221	1.03813	0.987969	1.04387	23.8937	20.097	1.90271	3.90127	0.000532823
Gm35060	1.03813	0	7.3071	36.3184	21.1018	7.61084	2.97708	0.000543895
Sema6c	10.3813	2.96391	8.35097	21.0264	29.1406	25.6866	1.81306	0.000560596
Nlrp12	7.26689	2.96391	9.39484	33.4512	22.1067	18.0757	1.91603	0.000561016
Pdc	0	0	0	8.60173	1.00485	13.319	5.34739	0.000561136
Adamts20	23.8769	25.6872	33.4039	52.5661	55.2667	65.6435	1.06556	0.000565614
Gm4876	15.5719	18.7714	19.8336	34.4069	40.194	58.0327	1.29213	0.000569459
Scml4	23.8769	16.7955	26.0968	61.1678	53.257	39.0056	1.20281	0.000570748
Gbp10	46.7157	17.7834	17.7458	405.237	284.373	46.6164	3.16255	0.000570938
Gm11545	4.15251	4.93984	5.21936	19.1149	19.0921	19.0271	1.99928	0.000578347
Gm18949	12.4575	4.93984	8.35097	30.5839	22.1067	29.492	1.68129	0.000584302
Zfp455	7.26689	15.8075	11.4826	29.6282	35.1697	32.3461	1.48576	0.000584677
Hr	16.61	10.8677	11.4826	27.7167	29.1406	56.1299	1.53917	0.000585565
Cd46	86.1645	57.3022	86.6413	113.734	128.621	174.098	0.857995	0.000588314
Rims2	553.321	534.491	557.427	1055.15	1048.06	545.126	0.686618	0.000590664
Pik3r5	18.6863	17.7834	14.6142	54.4776	27.1309	49.4705	1.36106	0.000605665
Mocos	25.9532	43.4706	41.7549	65.9466	74.3589	80.8652	0.990737	0.000606371
9230110C19Rik	21.8007	23.7113	15.6581	39.1856	47.2279	54.2272	1.19898	0.000610599
Znrd1as	93.4314	101.761	91.8607	130.937	156.757	171.244	0.67633	0.00061269
Il23a	45.6776	20.7473	37.5794	132.849	75.3637	52.3245	1.32756	0.000614148
Gm33877	19.7244	14.8195	26.0968	66.9023	49.2376	34.2488	1.31325	0.000617887
Zfp189	90.317	135.352	103.343	157.698	172.834	219.763	0.740888	0.000623502
Mgat4a	112.118	138.316	97.0801	164.389	182.883	209.298	0.678144	0.000627683
Gbp6	49.8301	45.4466	50.1058	375.609	525.537	62.7894	2.72904	0.000628252
Fnbp1l	126.651	150.171	134.659	200.707	185.897	240.693	0.608266	0.000635491
Lrrn4cl	89.2789	94.845	108.563	143.362	139.674	224.52	0.795226	0.000641199
LOC102634459	9.34314	9.87969	3.13161	27.7167	23.1115	24.7352	1.75235	0.000641505
Gm35021	5.19063	9.87969	7.3071	28.6724	23.1115	21.8812	1.71467	0.000645737
Tmem71	75.7832	68.1698	79.3342	109.911	112.543	186.466	0.874318	0.000648118
Gm1966	8.30501	15.8075	11.4826	45.8759	37.1794	21.8812	1.5554	0.000655394
Irgm2	659.21	517.696	604.402	3043.1	3267.77	806.749	1.99846	0.000658438
Kctd4	5.19063	1.97594	3.13161	20.0707	8.0388	27.5893	2.44436	0.000660459
Shox2	585.503	485.093	503.146	1309.37	1254.05	676.413	1.04171	0.0006696
Slfn8	391.374	388.272	407.11	2054.86	2153.39	526.099	1.99612	0.000677057
LOC108169029	3.11438	0	3.13161	16.2477	9.04365	18.0757	2.81569	0.000678616
LOC105246307	3.11438	6.91578	3.13161	13.3805	23.1115	20.9298	2.11489	0.000685187
Tlr3	251.227	208.461	235.915	1017.87	1048.06	313.947	1.77455	0.000690931
Gm36640	8.30501	1.97594	4.17549	32.4954	19.0921	13.319	2.17479	0.000692688
Gm34982	0	0.987969	0	19.1149	12.0582	1.90271	4.91016	0.000694606
Gm11427	0	0	0	11.469	7.03395	1.90271	5.17533	0.000697071
Cubn	84.0883	129.424	101.256	147.185	206.999	174.098	0.744814	0.000699797
1700086P04Rik	10.3813	10.8677	16.7019	37.2741	36.1746	27.5893	1.41431	0.000709465
Tnnc2	4.15251	4.93984	3.13161	21.0264	19.0921	13.319	2.12375	0.000717449
1700001J03Rik	1.03813	0	0	15.292	15.0727	1.90271	4.87319	0.000728933
Stradb	221.121	207.473	238.003	288.636	296.431	434.769	0.614238	0.000739066
Setdb2	552.283	465.333	540.725	886.934	943.554	543.224	0.60706	0.000766828
Adamts4	42.5632	43.4706	28.1845	84.1058	76.3686	62.7894	0.965068	0.000770782
Rassf6	13.4956	28.6511	16.7019	52.5661	33.16	63.7408	1.34197	0.00077295
Glt28d2	111.08	91.8811	89.773	149.097	140.679	174.098	0.66514	0.000772997
Msh5	44.6394	47.4225	38.6232	74.5483	67.3249	116.065	0.981322	0.000781673
C430049E01Rik	15.5719	10.8677	8.35097	37.2741	36.1746	23.7839	1.48223	0.000788909
LOC108167673	17.6482	25.6872	15.6581	60.2121	37.1794	42.811	1.24654	0.000789806
Il16	7.26689	2.96391	8.35097	37.2741	27.1309	11.4163	2.0349	0.000792544
Gm34861	0	0	0	9.55747	5.02425	3.80542	5.02632	0.000816152
Ptprt	32.1819	14.8195	33.4039	82.1943	88.4268	36.1515	1.36491	0.000824173
Ank3	16.61	21.7353	13.5703	45.8759	43.2085	34.2488	1.24452	0.000828601
LOC106557447	123.537	102.749	131.528	187.326	152.737	271.136	0.774068	0.000834579
Rnf170-ps	30.1057	35.5669	31.3161	71.6811	50.2425	71.3516	0.995193	0.000835037
LOC100503338	32.1819	32.603	40.711	78.3713	54.2619	74.2057	0.973624	0.000840492
Rtp4	612.495	492.996	608.577	1371.5	1497.23	740.154	1.07413	0.000842235
Mylip	171.291	231.185	222.345	355.538	333.61	255.914	0.596215	0.000852094
Rgs7bp	0	2.96391	2.08774	7.64598	18.0873	14.2703	2.97072	0.000858889
Mcf2l	4.15251	10.8677	7.3071	17.2035	19.0921	50.4218	1.95419	0.000876692
Gabrd	22.8388	23.7113	12.5265	49.6989	39.1891	47.5677	1.20596	0.000877887
Gm527	60.2113	74.0977	39.6671	98.442	120.582	100.844	0.875524	0.000897139
Tmem181c-ps	70.5926	54.3383	58.4568	138.583	91.4413	97.9896	0.840486	0.000908703
Csrp2	301.057	239.088	246.354	360.317	328.586	539.418	0.643932	0.000909942
Npm2	88.2408	79.0375	110.65	278.122	215.038	93.2328	1.07747	0.00091968
2810013P06Rik	72.6689	84.9653	64.72	107.999	135.655	124.627	0.725922	0.000921489
Ica1l	65.402	71.1338	56.3691	103.221	99.4801	122.725	0.753934	0.000922161
Majin	4.15251	3.95188	3.13161	19.1149	17.0824	13.319	2.13822	0.000934273
Pglyrp4	0	0	0	6.69023	7.03395	3.80542	4.95527	0.000943443
Gm30120	1.03813	0	0	15.292	4.0194	8.56219	4.66682	0.000947912
Kcnu1	65.402	79.0375	84.5536	116.601	109.529	182.66	0.836815	0.000956038
Hspa13	964.42	1025.51	921.739	2228.8	2117.22	1193	0.927717	0.000956693
Anxa6	10.3813	11.8556	11.4826	28.6724	40.194	23.7839	1.45532	0.000960414
Sp110	295.866	222.293	306.898	1071.39	1012.89	371.98	1.57396	0.000966368
1810020O05Rik	33.2201	24.6992	21.9213	40.1414	55.2667	92.2814	1.23425	0.000972709
Zfp937	93.4314	89.9052	102.299	138.583	134.65	187.417	0.690722	0.000972791
Cp	524.254	453.478	522.98	1182.26	1410.81	642.165	1.10819	0.000986549
Prkcb	0	3.95188	4.17549	15.292	8.0388	27.5893	2.64429	0.000994052
Phex	104.851	118.556	84.5536	141.451	167.81	182.66	0.674334	0.000994983
Slc7a15	2.07625	0	3.13161	10.5132	12.0582	15.2217	2.87904	0.000997567
1110002J07Rik	6.22876	3.95188	5.21936	15.292	15.0727	30.4434	1.98647	0.0010079
Trim69	4.15251	3.95188	10.4387	27.7167	25.1212	15.2217	1.88093	0.00101477
Gm35960	3.11438	0	1.04387	8.60173	13.063	14.2703	3.12864	0.00101629
Cfap53	3.11438	2.96391	1.04387	21.0264	22.1067	4.75677	2.74264	0.001034
4933412E12Rik	277.18	302.318	280.801	561.979	573.769	286.358	0.72463	0.00103885
Gm5820	23.8769	27.6631	22.9652	33.4512	56.2716	93.2328	1.29561	0.00104095
Shc4	92.3933	66.1939	112.738	149.097	140.679	160.779	0.734065	0.00104402
5430435K18Rik	9.34314	9.87969	6.26323	21.9822	26.1261	27.5893	1.56767	0.00105621
LOC105243968	12.4575	11.8556	16.7019	29.6282	32.1552	40.9083	1.32665	0.00105706
Ube2l6	836.73	763.7	936.353	2399.88	2236.8	1078.84	1.17189	0.00105855
Phf11c	20.7625	19.7594	18.7897	79.327	80.388	18.0757	1.58266	0.00110655
Bcl6	383.069	400.127	414.417	828.633	714.448	393.861	0.693462	0.00110887
Scd3	19.7244	31.615	29.2284	70.7253	68.3298	39.0056	1.14164	0.00111507
A3galt2	4.15251	15.8075	10.4387	61.1678	56.2716	9.51355	2.05724	0.00111869
Gm4285	35.2963	33.5909	34.4478	65.9466	49.2376	98.9409	1.05302	0.00111886
Nat8f4	22.8388	45.4466	41.7549	87.9288	87.4219	55.1786	1.06445	0.00112096
E130102H24Rik	7.26689	0.987969	4.17549	21.9822	15.0727	17.1244	2.13602	0.00112178
Gm12247	10.3813	14.8195	18.7897	35.3627	43.2085	30.4434	1.30812	0.00112912
LOC101055758	161.948	107.689	102.299	360.317	563.721	190.271	1.58294	0.00113914
Neu3	45.6776	48.4105	54.2813	72.6368	97.4704	92.2814	0.82211	0.00114285
Nhlrc4	4.15251	3.95188	4.17549	11.469	12.0582	34.2488	2.23691	0.00114732
LOC102632957	1.03813	1.97594	1.04387	8.60173	7.03395	20.9298	3.16582	0.0011518
Mpeg1	3.11438	1.97594	0	14.3362	16.0776	7.61084	2.89459	0.00119166
Adh1	40.4869	20.7473	32.36	72.6368	51.2473	69.4489	1.05088	0.00119334
Gm31683	2.07625	0.987969	5.21936	10.5132	20.097	14.2703	2.44736	0.00119776
Calr	11678.9	10763.9	10866.7	21411.6	17948.6	10933.9	0.594452	0.0012091
Tacr2	1.03813	0.987969	5.21936	21.0264	21.1018	5.70813	2.73181	0.00121556
Catip	5.19063	2.96391	3.13161	21.9822	15.0727	12.3676	2.13403	0.00124571
Lrriq3	16.61	27.6631	22.9652	32.4954	55.2667	71.3516	1.24057	0.00124685
Gm4419	6.22876	10.8677	7.3071	21.9822	15.0727	49.4705	1.82468	0.00125296
Ifit2	543.978	584.878	552.208	1257.76	1416.84	688.781	1.00042	0.00126318
Gm34653	34.2582	35.5669	26.0968	44.9201	69.3346	85.6219	1.05793	0.00126964
Mbd4	129.766	197.594	154.493	261.875	290.402	204.541	0.649641	0.00128736
Abtb2	1.03813	0	8.35097	21.0264	14.0679	18.0757	2.51867	0.00129815
LOC108169104	1.03813	0	0	8.60173	3.01455	15.2217	4.61285	0.0013017
Mterf2	91.3551	86.9413	100.212	183.503	161.781	114.163	0.72231	0.00130676
Gm32605	0	1.97594	1.04387	7.64598	14.0679	10.4649	3.39342	0.00131083
2500002B13Rik	31.1438	35.5669	21.9213	44.9201	63.3055	78.0111	1.06912	0.00132157
Gm21975	4.15251	5.92781	6.26323	19.1149	20.097	18.0757	1.80799	0.00132428
Mical1	2.07625	0	2.08774	13.3805	9.04365	11.4163	3.04343	0.00132594
Zfp54	63.3257	86.9413	72.0271	107.044	121.587	137.946	0.720269	0.00132613
A230098N10Rik	1.03813	0	0	17.2035	6.0291	3.80542	4.62134	0.00133673
Gm13846	25.9532	31.615	18.7897	39.1856	54.2619	78.0111	1.165	0.00134033
LOC102632476	279.256	266.752	262.012	342.158	340.644	591.743	0.657977	0.00134342
Pag1	151.566	145.231	148.23	251.362	254.227	173.147	0.608468	0.00134813
Parp16	157.795	221.305	187.897	252.317	259.251	348.196	0.600154	0.00136391
Pla1a	19.7244	14.8195	20.8774	53.5219	41.1988	32.3461	1.1995	0.00138339
Cnga3	1.03813	0	0	9.55747	9.04365	5.70813	4.46565	0.00138482
Abcb11	2.07625	4.93984	4.17549	18.1592	23.1115	9.51355	2.1749	0.00141096
Ppp1r42	6.22876	8.89172	4.17549	36.3184	16.0776	17.1244	1.8454	0.00142012
Nod1	17.6482	23.7113	26.0968	73.5925	68.3298	26.6379	1.31994	0.00142236
Iqck	8.30501	5.92781	6.26323	24.8494	13.063	31.3947	1.76212	0.00142735
Sema4g	2.07625	1.97594	8.35097	32.4954	20.097	8.56219	2.30947	0.00144673
Gm36409	5.19063	2.96391	2.08774	9.55747	20.097	18.0757	2.22012	0.00146109
LOC105245585	2.07625	0	3.13161	23.8937	13.063	4.75677	3.01884	0.00147458
Msh3	359.192	449.526	360.136	705.342	716.458	398.618	0.638548	0.00148645
Trim21	213.854	203.522	245.31	1199.46	1310.32	265.428	2.0662	0.00149535
Igsf11	20.7625	23.7113	24.009	38.2299	43.2085	69.4489	1.14035	0.00149551
2610316D01Rik	26.9913	24.6992	32.36	43.9644	71.3443	56.1299	1.02818	0.00149825
Trpc5os	1.03813	3.95188	0	8.60173	14.0679	14.2703	2.86225	0.00151444
Ifit1bl1	2.07625	2.96391	5.21936	31.5397	34.1649	1.90271	2.72074	0.00151544
LOC102640957	12.4575	13.8316	12.5265	23.8937	32.1552	42.811	1.34822	0.00151716
Csn3	2313.98	1726.97	2038.68	6179.86	6006.99	2577.22	1.28004	0.00151723
Dram1	143.261	140.292	149.274	250.406	231.115	171.244	0.592606	0.00153644
Slc4a11	77.8595	75.0856	74.1149	110.867	153.742	108.454	0.71501	0.00155885
Gfpt2	17.6482	15.8075	12.5265	26.7609	37.1794	47.5677	1.27757	0.00156405
Gm38424	128.728	96.8209	110.65	143.362	171.829	234.985	0.711664	0.00157208
Robo2	7.26689	8.89172	4.17549	15.292	28.1358	23.7839	1.7184	0.00157669
Gm35782	8.30501	12.8436	13.5703	18.1592	41.1988	38.0542	1.48597	0.00159156
LOC108168284	0	0	0	4.77874	3.01455	8.56219	4.85929	0.00159801
Gm39099	0	0.987969	0	11.469	11.0533	2.85406	4.52663	0.00160063
Esm1	2965.93	2358.28	2269.38	4278.88	3934.99	7401.54	1.04014	0.00161141
Sez6l2	17.6482	25.6872	24.009	64.0351	49.2376	35.2001	1.13907	0.00161258
Psca	1.03813	1.97594	2.08774	11.469	11.0533	11.4163	2.73156	0.00163275
Ddah2	42.5632	54.3383	58.4568	110.867	94.4559	72.303	0.837026	0.00164713
Tdrd6	6.22876	1.97594	2.08774	28.6724	12.0582	10.4649	2.32104	0.00165715
Nlgn2	714.231	846.689	830.922	2689.47	2358.38	994.166	1.33688	0.00165996
Gm34223	1.03813	1.97594	2.08774	15.292	20.097	3.80542	2.93639	0.00166094
Daxx	853.34	855.581	932.177	4752.93	4357.03	1043.64	1.94278	0.00167401
Gm960	7.26689	4.93984	7.3071	24.8494	16.0776	21.8812	1.69179	0.0016878
LOC108167748	17.6482	17.7834	13.5703	33.4512	50.2425	31.3947	1.22841	0.00169117
Urah	0	0	1.04387	4.77874	5.02425	15.2217	4.51081	0.00169646
Zfp821	16.61	30.627	26.0968	45.8759	53.257	53.2759	1.05247	0.00169668
Pabpc1l	8.30501	1.97594	3.13161	33.4512	18.0873	9.51355	2.19323	0.00169939
Adcy1	9.34314	3.95188	4.17549	13.3805	24.1164	24.7352	1.83575	0.0017189
Gm13251	44.6394	48.4105	50.1058	69.7696	74.3589	130.336	0.939943	0.00172838
Adssl1	239.807	275.643	222.345	312.529	309.494	664.997	0.802863	0.00174765
Homez	36.3344	92.8691	59.5007	121.38	138.669	104.649	0.947456	0.0017524
Gm36913	6.22876	9.87969	8.35097	37.2741	28.1358	13.319	1.6834	0.00175636
Mgarp	0	1.97594	2.08774	4.77874	9.04365	23.7839	3.20518	0.00176415
Gm36229	3.11438	0.987969	4.17549	13.3805	13.063	14.2703	2.30997	0.00179535
Iigp1	29.0675	41.4947	32.36	284.813	263.271	38.0542	2.50925	0.00180134
Fap	4.15251	0	1.04387	21.0264	21.1018	2.85406	3.12595	0.00180477
Dnm3	56.0588	44.4586	39.6671	63.0793	93.451	101.795	0.881764	0.00181571
Mlkl	1317.38	1357.47	1307.97	3223.74	3044.7	1580.2	0.978619	0.00183583
Eif2ak2	2261.04	1906.78	2287.12	9201.94	9403.39	2594.34	1.71557	0.00188114
Gm42142	26.9913	23.7113	25.0529	44.9201	51.2473	53.2759	0.980709	0.00189629
Zfp40	43.6013	34.5789	51.1497	71.6811	81.3928	76.1084	0.82718	0.00189819
Mylk2	4.15251	2.96391	1.04387	17.2035	9.04365	15.2217	2.34515	0.00191726
Gm16378	29.0675	41.4947	35.4916	97.4862	67.3249	49.4705	1.01345	0.00193038
Gm10634	1.03813	1.97594	3.13161	17.2035	11.0533	8.56219	2.58485	0.00193799
Amdhd1	5.19063	7.90375	12.5265	21.9822	27.1309	24.7352	1.52821	0.00195939
Zswim5	41.5251	49.3984	52.1936	88.8845	100.485	65.6435	0.831963	0.00198519
Pydc3	7.26689	5.92781	4.17549	45.8759	29.1406	4.75677	2.19825	0.00199864
Cdh17	6.22876	22.7233	8.35097	18.1592	40.194	65.6435	1.72658	0.00200619
Zfp97	75.7832	113.616	96.0362	149.097	161.781	136.995	0.647984	0.00201548
Gm39954	0	0	0	9.55747	2.0097	4.75677	4.85687	0.00201809
Gm40378	37.3726	53.3503	64.72	110.867	92.4462	77.0598	0.850923	0.00202715
Gm32600	3.11438	0.987969	0	11.469	10.0485	10.4649	2.96614	0.00204221
Gm26559	12.4575	18.7714	12.5265	29.6282	27.1309	54.2272	1.34138	0.00205333
Gm38434	7.26689	7.90375	7.3071	24.8494	22.1067	19.0271	1.55265	0.00207723
Fry	12.4575	12.8436	18.7897	43.9644	40.194	23.7839	1.29255	0.00207997
Creb3l2	1025.67	833.846	914.431	2548.02	2253.88	1129.26	1.09638	0.00208109
Gm32788	7.26689	0	2.08774	23.8937	12.0582	13.319	2.41135	0.00208445
Ang	20.7625	18.7714	19.8336	46.8316	48.2328	32.3461	1.10122	0.00209847
Cog3	1335.03	1177.66	1328.85	3100.44	2635.72	1538.34	0.921172	0.00211201
LOC108168271	4.15251	3.95188	0	14.3362	19.0921	9.51355	2.39481	0.00211299
Gm15163	95.5076	125.472	116.914	157.698	157.761	198.833	0.605719	0.002119
Erp27	19.7244	9.87969	11.4826	56.3891	51.2473	15.2217	1.58132	0.00214506
Catsperd	28.0294	20.7473	28.1845	71.6811	52.2522	38.0542	1.07564	0.00215
Lag3	7.26689	3.95188	5.21936	39.1856	19.0921	8.56219	2.0272	0.00215123
Mmp28	201.397	182.774	211.906	417.662	405.959	190.271	0.766183	0.00215501
Scn4a	0	0.987969	0	14.3362	7.03395	2.85406	4.46183	0.00216406
Gm41280	1.03813	1.97594	7.3071	9.55747	17.0824	22.8325	2.26866	0.00217294
Gm15975	103.813	90.8931	59.5007	156.743	148.718	118.919	0.738393	0.00218359
Gm8085	103.813	90.8931	59.5007	156.743	148.718	118.919	0.738393	0.00218359
Slc43a2	0	0.987969	3.13161	15.292	7.03395	10.4649	3.00219	0.00220888
4930526H09Rik	0	0	2.08774	10.5132	8.0388	9.51355	3.77426	0.00220997
4930556M19Rik	17.6482	30.627	22.9652	40.1414	41.1988	82.7679	1.20274	0.00221522
Ifi44	1311.15	961.294	1468.73	5838.66	5673.38	1528.83	1.80149	0.00222332
Rasgef1a	6.22876	11.8556	8.35097	21.0264	27.1309	25.6866	1.4766	0.00223768
Gm20939	124.575	128.436	81.422	160.566	206.999	164.584	0.668314	0.00224032
Gm2427	45.6776	38.5308	66.8078	101.309	98.4753	73.2543	0.856041	0.00225551
Gm36401	124.575	92.8691	106.475	148.141	167.81	170.293	0.586962	0.00228258
Tmprss11b	1.03813	0.987969	6.26323	4.77874	17.0824	29.492	2.64135	0.00230647
Ppp1r32	7.26689	6.91578	16.7019	45.8759	37.1794	14.2703	1.65893	0.00231218
Gm15433	143.261	89.9052	137.791	436.777	472.279	161.73	1.52951	0.00231333
Fcna	167.138	157.087	147.186	190.194	221.067	319.655	0.633077	0.00232321
Prtg	8.30501	6.91578	10.4387	16.2477	31.1503	26.6379	1.5298	0.00233613
Dhtkd1	170.253	218.341	183.721	302.016	351.697	215.958	0.60231	0.00234526
4933421O10Rik	34.2582	45.4466	72.0271	82.1943	96.4656	100.844	0.882307	0.00237557
2610027F03Rik	2.07625	0.987969	2.08774	7.64598	7.03395	20.9298	2.79913	0.00238408
4732491K20Rik	67.4782	31.615	42.7987	86.973	68.3298	132.238	1.0219	0.00238741
Adap2	9.34314	16.7955	14.6142	35.3627	50.2425	20.9298	1.38162	0.00241894
Wnt9a	23.8769	30.627	34.4478	38.2299	55.2667	116.065	1.23702	0.00242481
Glra2	0	0	0	7.64598	2.0097	5.70813	4.76957	0.00244656
Ggnbp1	20.7625	13.8316	17.7458	34.4069	45.2182	35.2001	1.13457	0.00246176
Cacna1s	0	0	0	4.77874	4.0194	5.70813	4.68459	0.0024699
LOC102640673	96.5458	112.628	101.256	139.539	145.703	188.368	0.609264	0.00249774
Pnp	669.592	677.747	700.438	1867.53	1782.6	803.895	1.12102	0.0025011
Tpd52l1	1.03813	2.96391	5.21936	15.292	25.1212	6.65948	2.35014	0.00250484
Ccdc173	23.8769	22.7233	15.6581	41.0971	37.1794	53.2759	1.07911	0.00252183
4933427G17Rik	0	0.987969	0	5.73448	7.03395	8.56219	4.27815	0.00254724
LOC108168144	0	0	0	3.82299	7.03395	3.80542	4.69633	0.00255895
Gm30744	0	1.97594	1.04387	3.82299	9.04365	19.0271	3.38508	0.00263082
Stx5a	782.747	706.398	757.851	1749.02	1622.83	875.247	0.918463	0.00263925
Iah1	117.308	119.544	115.87	194.972	137.664	202.639	0.602784	0.00264573
A630033H20Rik	9.34314	13.8316	10.4387	17.2035	29.1406	47.5677	1.48031	0.00265451
Gm35551	4.15251	6.91578	3.13161	9.55747	20.097	24.7352	1.93027	0.00268679
Dnhd1	282.37	257.86	293.328	551.466	478.309	274.942	0.646361	0.00269534
Zfp939	79.9357	82.0014	72.0271	111.822	113.548	137.946	0.634893	0.00272688
Gm40560	1.03813	2.96391	4.17549	19.1149	18.0873	5.70813	2.38945	0.00273271
Olfr920	2.07625	0	4.17549	14.3362	15.0727	7.61084	2.58229	0.00273836
Gm36076	3.11438	7.90375	6.26323	30.5839	36.1746	5.70813	2.06236	0.002755
Tmc4	35.2963	38.5308	62.6323	119.468	89.4316	59.9354	0.979405	0.00277626
Tmtc1	0	0	7.3071	13.3805	18.0873	13.319	2.63165	0.00278447
Naip6	90.317	76.0736	83.5097	122.336	142.689	117.968	0.615923	0.0027907
Nxpe4	46.7157	56.3142	48.0181	102.265	114.553	59.9354	0.871456	0.00281183
Znfx1	851.264	936.594	1016.73	3223.74	3135.13	1096.91	1.41055	0.00282442
Gtsf1	21.8007	17.7834	13.5703	35.3627	48.2328	33.2974	1.13486	0.00283358
Gk5	155.719	140.292	137.791	263.786	301.455	148.411	0.71754	0.00286496
Mov10	583.427	646.132	684.78	1604.7	1582.64	749.668	1.0402	0.00287409
Cpxm1	0	0	3.13161	11.469	15.0727	4.75677	3.34022	0.00288627
Cybrd1	1.03813	7.90375	2.08774	19.1149	30.1455	6.65948	2.32517	0.00289547
Trim43a	2.07625	0.987969	3.13161	12.4247	12.0582	9.51355	2.46532	0.00291286
Mir24-2	3.11438	4.93984	9.39484	11.469	19.0921	32.3461	1.85347	0.00291398
9430037G07Rik	10.3813	20.7473	11.4826	31.5397	27.1309	45.665	1.28817	0.00291831
Clca1	138.071	156.099	136.747	181.592	192.931	280.65	0.604505	0.00296328
Gm30984	8.30501	4.93984	8.35097	21.0264	27.1309	16.173	1.57719	0.00296363
Gatsl2	123.537	172.895	107.519	215.999	231.115	176.952	0.625416	0.0030219
Gm33045	1.03813	0	2.08774	6.69023	13.063	8.56219	3.1975	0.00305762
Nat2	56.0588	91.8811	87.6852	113.734	119.577	159.828	0.737989	0.00308527
Vwf	3.11438	9.87969	9.39484	25.8052	28.1358	15.2217	1.62206	0.00309855
LOC108167450	7.26689	3.95188	2.08774	31.5397	11.0533	12.3676	2.04873	0.00312519
Golph3l	509.72	515.72	518.804	972.951	856.132	488.045	0.585281	0.00312626
Gm7160	17.6482	14.8195	32.36	43.0086	65.3152	37.1028	1.1671	0.00315486
Trim13	93.4314	79.0375	84.5536	111.822	136.66	145.557	0.616896	0.00315504
C330024C12Rik	0	0	0	6.69023	8.0388	0.951355	4.79301	0.00317045
Igha	0	0	0	7.64598	7.03395	0.951355	4.78933	0.00319212
Fam26d	13.4956	11.8556	14.6142	36.3184	25.1212	31.3947	1.21885	0.00319254
LOC102633086	9.34314	5.92781	8.35097	27.7167	22.1067	17.1244	1.50623	0.00321026
Gm32639	0	2.96391	0	4.77874	6.0291	22.8325	3.47235	0.00322123
Gm5510	1.03813	0.987969	2.08774	7.64598	10.0485	11.4163	2.82897	0.00324125
Srrm3	4.15251	0.987969	0	16.2477	21.1018	2.85406	2.96942	0.00324144
Gm32355	35.2963	29.6391	48.0181	56.3891	56.2716	128.433	1.09644	0.00328767
Oas1d	1.03813	0	0	14.3362	4.0194	3.80542	4.33512	0.00329057
Mpp2	56.0588	81.0134	63.6762	111.822	112.543	97.9896	0.68105	0.00329527
LOC102633666	21.8007	30.627	17.7458	43.0086	36.1746	76.1084	1.14473	0.00330868
Gm30062	6.22876	1.97594	6.26323	17.2035	15.0727	18.0757	1.80903	0.00333525
Ropn1l	14.5338	22.7233	14.6142	27.7167	37.1794	54.2272	1.19662	0.0033481
Gm30050	4.15251	0.987969	0	12.4247	17.0824	5.70813	2.77859	0.00335129
Ankrd29	49.8301	50.3864	52.1936	64.0351	83.4025	135.092	0.891144	0.00337682
Lctl	12.4575	16.7955	13.5703	21.9822	36.1746	43.7623	1.24868	0.00339868
Gm26008	2.07625	1.97594	2.08774	11.469	16.0776	6.65948	2.47556	0.00340174
Harbi1	75.7832	101.761	76.2026	142.406	116.563	134.141	0.630477	0.00341705
Akap12	5.19063	7.90375	5.21936	19.1149	24.1164	14.2703	1.64432	0.0034514
D6Ertd527e	2.07625	5.92781	0	15.292	20.097	7.61084	2.40476	0.00349524
Gm31356	6.22876	4.93984	8.35097	18.1592	16.0776	24.7352	1.6004	0.0035243
Ribc1	33.2201	35.5669	39.6671	67.8581	59.2861	62.7894	0.809181	0.00352732
Trim40	12.4575	14.8195	14.6142	23.8937	30.1455	44.7137	1.2373	0.00354946
Gm13807	0	0	0	5.73448	4.0194	3.80542	4.58667	0.00356272
Gm35853	32.1819	19.7594	33.4039	48.7431	47.2279	73.2543	0.991631	0.00356445
Gm35464	0	0.987969	1.04387	16.2477	6.0291	4.75677	3.72781	0.00357012
Akap7	288.599	249.956	274.538	302.016	365.765	587.937	0.627507	0.00357816
Fam213a	41.5251	33.5909	25.0529	57.3448	53.257	78.0111	0.91371	0.00357974
Ccdc168	5.19063	6.91578	6.26323	55.4333	18.0873	5.70813	2.10826	0.00358332
Gm6627	65.402	33.5909	28.1845	52.5661	103.5	114.163	1.08789	0.00358944
Spdef	4.15251	0	0	14.3362	8.0388	9.51355	2.9571	0.00364178
Piwil2	11.4194	6.91578	4.17549	23.8937	22.1067	19.0271	1.53061	0.00365191
Fam46d	1.03813	0.987969	1.04387	7.64598	10.0485	8.56219	3.096	0.00365979
Gm1661	0	0	0	4.77874	6.0291	2.85406	4.59495	0.00366765
Gm40743	10.3813	0.987969	12.5265	26.7609	21.1018	27.5893	1.66986	0.00368943
Gm21685	11.4194	6.91578	5.21936	10.5132	9.04365	92.2814	2.24933	0.00370617
Ociad2	6.22876	4.93984	3.13161	19.1149	21.1018	10.4649	1.82246	0.00370849
Neurl3	22.8388	9.87969	16.7019	35.3627	28.1358	52.3245	1.23439	0.00372306
Fam46a	3.11438	5.92781	7.3071	21.0264	27.1309	9.51355	1.81536	0.00372896
Gm30246	1.03813	1.97594	1.04387	5.73448	8.0388	16.173	2.8767	0.00373998
Helz2	5835.31	5233.27	6285.15	21140.2	21041.6	6513.93	1.48855	0.00374095
H2-Bl	9.34314	9.87969	9.39484	30.5839	22.1067	20.9298	1.36336	0.00376359
Gm42109	40.4869	37.5428	39.6671	57.3448	76.3686	70.4003	0.793901	0.00378068
Ecel1	2.07625	0.987969	1.04387	4.77874	10.0485	15.2217	2.8754	0.00379042
9330104G04Rik	21.8007	16.7955	20.8774	29.6282	38.1843	63.7408	1.14778	0.00379129
LOC108168772	1.03813	1.97594	0	9.55747	6.0291	11.4163	3.14584	0.00380458
Gm40158	2.07625	2.96391	4.17549	21.0264	25.1212	2.85406	2.40917	0.00380671
Prss22	0	0.987969	2.08774	14.3362	9.04365	4.75677	3.19611	0.00381652
Ngef	300.019	354.681	293.328	362.228	398.925	764.889	0.686856	0.00383088
Kctd21	29.0675	36.5548	63.6762	86.0173	71.3443	82.7679	0.895172	0.00385313
Plcl1	35.2963	16.7955	22.9652	94.619	66.3201	25.6866	1.31567	0.00387389
Gm5454	62.2876	75.0856	90.8168	126.159	107.519	122.725	0.644141	0.00388576
Smtnl2	0	0	0	1.91149	10.0485	2.85406	4.70873	0.00389757
Gm2959	35.2963	46.4345	54.2813	67.8581	93.451	75.157	0.796743	0.00391398
Fkbp1b	1.03813	0	0	2.86724	5.02425	13.319	4.27169	0.00395003
A330015K06Rik	5.19063	4.93984	9.39484	24.8494	19.0921	15.2217	1.60337	0.00395905
LOC102636700	4.15251	3.95188	14.6142	21.9822	22.1067	24.7352	1.60624	0.00399314
Stxbp3-ps	72.6689	33.5909	61.5884	92.7075	125.606	86.5733	0.862744	0.00399612
Ulbp1	1288.32	1287.32	1296.49	2996.27	2663.86	1464.14	0.879592	0.00400662
Notch1	659.21	756.784	818.395	1762.4	1522.35	870.49	0.895015	0.00401045
Gm35466	0	0	3.13161	12.4247	7.03395	8.56219	3.18491	0.00402493
Gm38906	1.03813	0	1.04387	7.64598	9.04365	7.61084	3.56528	0.00409956
Dusp13	6.22876	1.97594	0	11.469	19.0921	10.4649	2.32216	0.00414841
4933413J09Rik	2.07625	0	4.17549	22.9379	16.0776	2.85406	2.75775	0.00415115
Gm41348	1.03813	0	0	15.292	2.0097	4.75677	4.32948	0.00416596
Enpp2	1.03813	0	0	6.69023	2.0097	12.3676	4.26395	0.00421816
1700108F19Rik	6.22876	17.7834	16.7019	24.8494	34.1649	40.9083	1.29227	0.00424888
Slc7a3	22.8388	33.5909	30.2723	120.424	75.3637	23.7839	1.33958	0.00425077
4930525D18Rik	0	0	0	4.77874	9.04365	0.951355	4.70575	0.00436994
Ficd	141.185	122.508	113.782	281.945	212.023	131.287	0.727999	0.00438376
Smcr8	1481.41	1547.16	1491.69	3262.92	3023.59	1689.61	0.81925	0.00439509
E130112N10Rik	10.3813	13.8316	9.39484	40.1414	15.0727	33.2974	1.39713	0.00441071
Bmp2	120.423	94.845	153.449	217.91	142.689	227.374	0.675319	0.0044171
Zc2hc1c	23.8769	22.7233	35.4916	49.6989	59.2861	46.6164	0.923627	0.00445375
Rps27a-ps2	970.648	744.928	693.131	1107.71	3011.54	1685.8	1.26901	0.00448149
Gm36059	1.03813	0	1.04387	8.60173	4.0194	12.3676	3.60912	0.00448772
Gm40918	0	0	0	8.60173	5.02425	0.951355	4.69006	0.00450699
Cfap54	10.3813	5.92781	11.4826	26.7609	20.097	24.7352	1.37139	0.00452554
Gm35284	10.3813	6.91578	15.6581	21.0264	25.1212	38.0542	1.35898	0.00453804
Serpinb1c	2.07625	6.91578	1.04387	19.1149	15.0727	9.51355	2.10619	0.00455173
2310069B03Rik	4.15251	0	3.13161	5.73448	7.03395	33.2974	2.67579	0.00456365
LOC102638435	20.7625	23.7113	19.8336	49.6989	53.257	29.492	1.03969	0.00462453
3110039I08Rik	820.12	1056.14	1103.37	1530.15	1481.15	2749.42	0.951141	0.00462736
Tmem150a	276.142	222.293	213.994	686.227	645.114	274.942	1.17286	0.00463151
Rnf31	838.806	873.364	915.475	2313.86	2162.44	984.652	1.05536	0.00463211
Reep6	36.3344	29.6391	27.1407	63.0793	70.3395	41.8596	0.91148	0.00464118
Gm9903	2.07625	3.95188	5.21936	13.3805	9.04365	21.8812	1.98047	0.00464516
A530040E14Rik	59.1732	74.0977	82.4659	179.681	174.844	64.6921	0.957732	0.00470863
LOC101056073	17.6482	28.6511	22.9652	34.4069	40.194	76.1084	1.12071	0.0047716
Olfr99	17.6482	20.7473	17.7458	43.0086	40.194	31.3947	1.02757	0.00478635
U90926	8.30501	2.96391	4.17549	18.1592	6.0291	39.0056	2.03985	0.00480614
Gm7967	13.4956	15.8075	18.7897	50.6546	40.194	20.9298	1.21643	0.00483653
2900092C05Rik	2.07625	0	2.08774	6.69023	10.0485	11.4163	2.77558	0.00485841
Icam2	3.11438	0	0	12.4247	15.0727	2.85406	3.29715	0.00486043
Tnni1	4.15251	8.89172	3.13161	12.4247	17.0824	24.7352	1.73702	0.00486407
Tas1r3	25.9532	26.6752	24.009	89.8403	68.3298	22.8325	1.23899	0.00486793
Pla2r1	46.7157	59.2781	77.2465	71.6811	115.558	139.849	0.836167	0.00487116
Nlrp2	2.07625	0.987969	2.08774	11.469	5.02425	14.2703	2.58898	0.00488056
LOC105244102	44.6394	63.23	74.1149	97.4862	109.529	90.3787	0.707782	0.00491531
Azin2	29.0675	36.5548	22.9652	48.7431	41.1988	97.0382	1.07736	0.00492653
Gm39853	68.5164	40.5067	39.6671	66.9023	101.49	97.0382	0.836544	0.00493636
Sycp1-ps1	2.07625	0.987969	3.13161	7.64598	14.0679	10.4649	2.38412	0.00494996
Gm38851	2.07625	1.97594	3.13161	14.3362	12.0582	7.61084	2.24565	0.00497703
[truncated: 710 more rows]
