# Supplementary material for: Lysosome-mediated mitochondrial apoptosis induced by tea polysaccharides promotes colon cancer cell death
Source: Royal Society of Chemistry journal article supplement (doi:10.1039/d1fo00987g), 2021-01-01

**Supplement Figure 1. TP induced apoptosis in HCT-116 cells.** (A) HCT-116 cells apoptosis was characterized by AO-EB staining. (B) Quantification of AO-EB staining. The pictures were all examined under an inverted fluorescence microscope with a magnification of 400. \*\*,  $p < 0.01$ ; \*,  $p < 0.05$ .

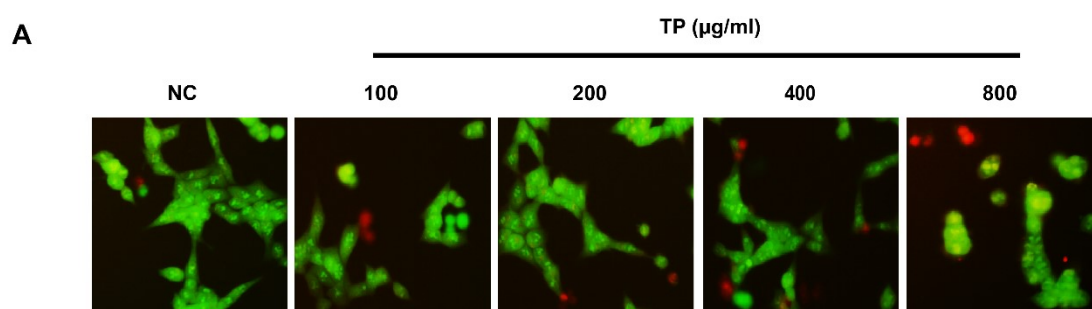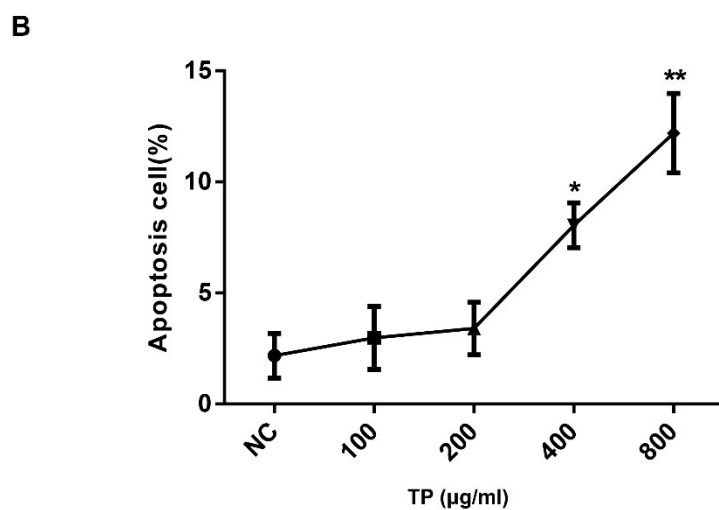

Supplement: d1fo00987g3.pdf [file d1fo00987g3.pdf]
